# Supplementary material for: Enantioselective cyclopropanation of (Z)-3-substituted-2-(4-pyridyl)-acrylonitriles catalyzed by Cinchona ammonium salts
Source: Royal Society of Chemistry journal article supplement (doi:10.1039/c6ob00154h), 2016-01-01
Supplement: c6ob00154h1.pdf [file c6ob00154h1.pdf]

## **Enantioselective cyclopropanation of (*Z*)-3-substituted-2-(4-pyridyl)-acrylonitriles catalyzed by *Chincona* ammonium salts.**

Claudia Del Fiandra, Maria Moccia and Mauro F. A. Adamo\*

Centre for Synthesis and Chemical Biology (CSCB), Department of Pharmaceutical and Medicinal Chemistry,  
the Royal College of Surgeons in Ireland, 123 St. Stephen's Green, Dublin 2, Ireland

Fax: (+353) 1 4022168

E-mail: [madamo@rcsi.ie](mailto:madamo@rcsi.ie),

### **Supporting Information**

## General Methods

$^1\text{H}$ ,  $^{13}\text{C}$  NMR spectra were recorded on a Bruker 400 instrument. Chemical shifts ( $\delta$ ) are reported in ppm relative to residual solvent signals for  $^1\text{H}$  and  $^{13}\text{C}$  NMR ( $^1\text{H}$  NMR: 7.26 ppm for  $\text{CDCl}_3$ , 3.34 ppm for  $\text{CD}_3\text{OD}$ ;  $^{13}\text{C}$  NMR: 77.0 ppm for  $\text{CDCl}_3$ , 49.00 ppm for  $\text{CD}_3\text{OD}$ ).  $^{13}\text{C}$  NMR spectra were acquired with  $^1\text{H}$  broad band decoupled mode. Coupling constants ( $J$ ) are in Hz. Multiplicities are reported as follows: s, singlet, d, doublet, dd, doublets of doublets, t, triplet, q, quartet, m, multiplet, c, complex, and br, broad. Mass spectra were recorded on a Micro mass LCT spectrometer using electrospray (ES) ionisation techniques. Optical rotations were measured on a Perkin-Elmer 241 polarimeter. The enantiomeric excess (*ee*) of the products was determined by chiral stationary phase CSP-HPLC (Daicel Chiralpak AD, Chiralcel OD and Chiralcel AS columns), using a UV detector operating at 254 nm and 210 nm. Infrared (IR) spectra were recorded as thin films between NaCl plates using a Bruker Tensor27 FT-IR instrument. Absorption maximum ( $\nu_{\text{max}}$ ) was reported in wavenumbers ( $\text{cm}^{-1}$ ) and only selected peaks are reported. The following abbreviations are used: w, weak, m, medium, s, strong and br, broad.

## Materials

Analytical grade solvents and commercially available reagents were used as received, unless otherwise stated. Reactions were checked for completion by TLC (EM Science, silica gel 60 F254). Flash chromatography was performed using silica gel 60 (0.040-0.063 mm, 230-400 mesh). Racemic samples were prepared using tetrabutylammonium bromide as a catalyst at room temperature.

### **Experimental procedure for the preparation of catalyst *N*-(3,5-bis (trifluoromethyl)) benzyl hydroquinidinium bromide (11).**

To a stirred suspension of hydroquinidine (2.00 g, 6.13 mmol) in acetone (35.0 mL), 3,5-bis(trifluoromethyl) benzyl bromide (1.18 ml, 6.44 mmol) was added. The resulting mixture was heated at 60 °C and stirred for 4 h at the same temperature. After cooling to r.t., the solvent was removed *in vacuo*. The residue was washed with  $\text{EtO}_2$  affording the title compound as a yellow solid (3.76 g, 97% yield), m.p. 195° (dec).

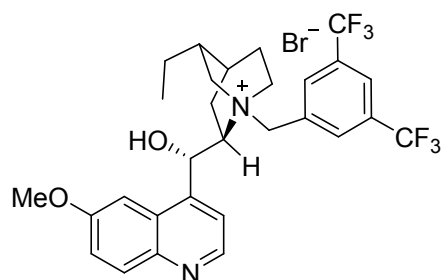

$[\alpha]_{\text{D}}^{20} = +350$  ( $c = 0.50$  in  $\text{CH}_3\text{Cl}$ );  $^1\text{H-NMR}$  (400 MHz,  $\text{CD}_3\text{OD}$ ): 8.79 (d,  $J = 4.8$  Hz, 1H), 8.42 (s, 2H), 8.25 (s, 1H), 8.05 (d,  $J = 9.2$  Hz, 1H), 7.93 (d,  $J = 4.8$  Hz, 1H), 7.57 (dd,  $J = 9.4$  Hz, 2.6 Hz, 1H), 7.49 (d,  $J = 2.4$  Hz, 1H), 6.58 (d,  $J = 1.6$  Hz, 1H), 5.25 (d,  $J = 12.4$  Hz, 1H), 5.05 (d,  $J = 12.8$  Hz, 1H), 4.25 (dt,  $J_{\text{d}} = 8.8$  Hz,  $J_{\text{t}} = 2.8$  Hz, 1H), 4.10 (s, 3H), 3.94 (t,  $J = 10.4$  Hz, 2H), 3.54 (t,  $J = 9.6$  Hz, 1H), 3.16-3.08 (m, 1H), 2.52 (t,  $J = 11.8$  Hz, 1H), 1.98 (m, 1H), 1.90-1.79 (m, 3H), 1.71-1.59 (m, 2H), 1.14-1.10 (m, 1H), 0.95 (t,  $J = 7.6$  Hz, 3H);  $^{13}\text{C-NMR}$  (100.6 MHz): 160.2, 148.3, 145.5, 144.7, 135.4, 133.8, 133.5, 132.1, 131.9, 127.5, 125.9, 125.6, 123.1, 122.6, 121.7, 103.4, 69.9, 67.0, 63.4, 58.3, 58.2, 56.6, 36.8, 30.6, 25.9, 25.3, 25.2, 22.2, 11.6; HRMS:  $m/z$  found  $[\text{M-Br}]^+$  553.2275,  $\text{C}_{29}\text{H}_{31}\text{F}_6\text{N}_2\text{O}_2$  requires 553.2284.

Catalysts **4a-j** have been prepared according to the procedure reported in the literature.<sup>1</sup>

Catalyst **4k** has been prepared according to the procedure reported in the literature.<sup>2</sup>

### Experimental procedure for the preparation of diethyl-2-bromomalonate (**2b**)

A solution of bromide (1.3 mL, 25.2 mmol, 1.10 eq) in  $\text{CCl}_4$  (16 mL) was added dropwise to a stirred mixture of diethyl bromomalonate (3.8 mL, 25.0 mmol, 1.0 eq) and  $\text{CCl}_4$  (10 mL) in a two-neck flask equipped with a reflux condenser. After six drops of the bromine solution had been added, the reaction was initiated by irradiating the flask with a 100W incandescent bulb. The remaining bromide solution was added over 15 min to maintain an orange-red color in the reaction mixture. Then the reaction mixture was refluxed for 6h at 100 °C. The reaction mixture was diluted with an equal volume of  $\text{CCl}_4$ , washed with 5%  $\text{NaHCO}_3$  (2 x 50 mL), dried over  $\text{MgSO}_4$ , filtered and evaporated *in vacuo*. The residue was purified by flash chromatography on silica gel eluting with Petroleum Ether/AcOEt 95:5 affording the product as a colourless liquid (5.04 g, 84% yield).

<sup>1</sup> C. Del Fiandra, M. Moccia, V. Cerulli, M. F. A. Adamo, *Chem. Commun.* **2016**, 52(8), 1697 doi: 10.1039/C5CC08105J.

<sup>2</sup> T. Furukawa, N. Shibata, S. Mizuta, S. Nakamura, T. Toru, M. Shiro, *Angew. Chem. Int. Ed.* **2008**, 47, 8051.

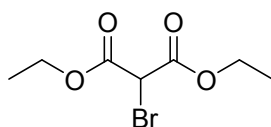

$^1\text{H-NMR}$  (400 MHz,  $\text{CDCl}_3$ ): 4.81 (s, 1H), 4.28 (q,  $J = 7.2$  Hz, 4H), 1.30 (t,  $J = 7.2$  Hz, 6H);  
 $^{13}\text{C-NMR}$  (100.6 MHz): 164.7, 63.3, 42.5, 14.0; HRMS:  $m/z$  found  $[\text{M}+\text{H}]^+$  238.9935,  
 $\text{C}_7\text{H}_{11}\text{BrO}_4$  requires 237.9841.

**(2*R*,3*R*)-dimethyl 2-cyano-3-phenyl-2-(pyridin-4-yl)cyclopropane-1,1-dicarboxylate (3)**

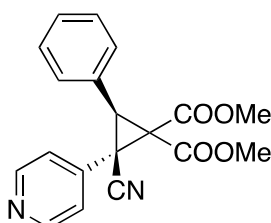

Reaction time: 120 h. Column chromatography (Solvents DCM:Et<sub>2</sub>O 7:3) afforded **3** as a yellow crystals (30.3 mg, 90% yield) m.p. 102-105 °C. The *ee* of the product was determined by CSP-HPLC using a Chiralpak AS column (*n*-hexane/*i*-PrOH 90:10, flow rate 0.75 mL/min,  $t_{\text{maj}} = 26.28$  min,  $t_{\text{min}} = 31.42$  min, 78% *ee*);  $[\alpha]_{\text{D}}^{20} = +35$  ( $c = 0.29$  in  $\text{CHCl}_3$ );  $^1\text{H-NMR}$  (400 MHz,  $\text{CDCl}_3$ ): 8.69 (s, 2H), 7.48-7.38 (m, 7H), 4.06 (s, 1H), 3.75 (s, 3H), 3.51 (s, 3H);  $^{13}\text{C-NMR}$  (100.6 MHz): 164.1, 163.4, 150.5, 141.5, 130.2, 129.0, 128.9, 123.7, 115.8, 63.0, 47.5, 35.8, 31.0, 13.9; IR (NaCl) /  $\text{cm}^{-1}$ : 2241 s, 1734 s; HRMS:  $m/z$  found  $[\text{M}]^+$  336.1121,  $\text{C}_{19}\text{H}_{16}\text{N}_2\text{O}_4$  requires 336.1110.

**(2*R*,3*R*)-di-*tert*-butyl 2-cyano-3-phenyl-2-(pyridin-4-yl)cyclopropane-1,1-dicarboxylate (13)**

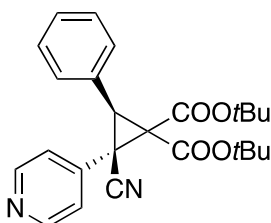

Reaction time: 120 h. Column chromatography (Solvents DCM:Et<sub>2</sub>O 7:3) afforded **13** as a yellow oil (37.7 mg, 90% yield). The *ee* of the product was determined by CSP-HPLC using a Chiralpak AD column (*n*-hexane/*i*-PrOH 90:10, flow rate 0.50 mL/min, *t*<sub>maj</sub> = 13.65 min, *t*<sub>min</sub> = 19.05 min, 64% *ee*); [ $\alpha$ ]<sub>D</sub><sup>20</sup> = +37 (c = 0.40 in CHCl<sub>3</sub>); <sup>1</sup>H-NMR (400 MHz, CDCl<sub>3</sub>): 8.69 (s, 2H), 7.48-7.38 (m, 7H), 4.06 (s, 1H), 1.49 (s, 9H), 1.11 (s, 9H); <sup>13</sup>C-NMR (100.6 MHz): 169.4, 166.0, 150.5, 141.5, 130.2, 129.0, 128.9, 123.7, 115.8, 81.6, 80.8, 47.5, 35.8, 31.0, 13.9; IR (NaCl) / cm<sup>-1</sup>: 2236 s, 1728 s; HRMS: *m/z* found [M]<sup>+</sup> 420.2156, C<sub>25</sub>H<sub>28</sub>N<sub>2</sub>O<sub>4</sub> requires 420.2049.

Prepared following general procedure using (*Z*)-3-(2,3-dihydrobenzo[*b*][1,4]dioxin-5-yl)-2-(4-pyridyl)acrylonitrile **1i** (26.4 mg, 0.10 mmol) and catalyst **11**. Reaction time: 144 h. Column chromatography (Solvents DCM:Et<sub>2</sub>O 7:3) afforded **12i** as a yellow oil (32.3 mg, 76% yield). The *ee* of the product was determined by CSP-HPLC using a Chiralcel OD column (*n*-hexane/*i*-PrOH 80:20, flow rate 1.00 mL/min, *t*<sub>maj</sub> = 24.98 min, *t*<sub>min</sub> = 40.40 min, 60% *ee*); [ $\alpha$ ]<sub>D</sub><sup>20</sup> = +27 (c = 0.25 in CHCl<sub>3</sub>); <sup>1</sup>H-NMR (400 MHz, CDCl<sub>3</sub>): 8.66 (d, *J* = 6.0 Hz, 2H), 7.40 (d, *J* = 6.2 Hz, 2H), 6.98-6.86 (m, 3H), 4.26 (s, 6H), 4.00-3.89 (m, 3H), 1.24 (t, *J* = 7.2 Hz, 3H), 1.00 (t, *J* = 7.1 Hz, 3H); <sup>13</sup>C-NMR (100.6 MHz): 164.1, 163.4, 150.6, 144.2, 143.9, 141.3, 123.6, 123.0, 122.1, 118.1, 117.9, 115.8, 64.5, 64.4, 63.1, 63.0, 47.4, 35.3, 31.2, 13.9, 13.8; IR (NaCl) / cm<sup>-1</sup>: 2237 s, 1742 s; HRMS: *m/z* found [M+H]<sup>+</sup> 423.1561, C<sub>23</sub>H<sub>23</sub>N<sub>2</sub>O<sub>6</sub> requires 423.1556.

**(2*R*,3*R*)-Diethyl  
dicarboxylate (12k)**

**2-cyano-3-(4-nitrophenyl)-2-(pyridin-4-yl)cyclopropane-1,1-**

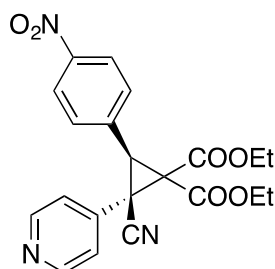

Prepared following general procedure using (*Z*)-3-(4-nitrophenyl)-2-(pyridin-4-yl)acrylonitrile **1k** (25.1 mg, 0.10 mmol) and catalyst **11**. Reaction time: 192 h. Column

chromatography (Solvents DCM:Et<sub>2</sub>O 7:3) afforded **12k** as a wine red oil (29.4 mg, 72% yield).

The *ee* of the product was determined by CSP-HPLC using a Chiralcel OD column (*n*-hexane/*i*-PrOH 90:10, flow rate 1.00 mL/min, *t*<sub>maj</sub> = 57.53 min, *t*<sub>min</sub> = 49.23 min, 16% *ee*); [ $\alpha$ ]<sub>D</sub><sup>20</sup> = +17 (c = 0.28 in CHCl<sub>3</sub>); <sup>1</sup>H-NMR (400 MHz, CDCl<sub>3</sub>): 8.72 (d, *J* = 5.6 Hz, 2H), 8.29 (d, *J* = 8.7 Hz, 2H), 7.69 (d, *J* = 8.9 Hz, 2H), 7.47 (d, *J* = 6.1 Hz, 2H), 4.29-4.21 (m, 2H), 4.09 (s, 1H), 4.05-3.93 (m, 2H), 1.23 (t, *J* = 7.2 Hz, 3H), 1.04 (t, *J* = 7.1 Hz, 3H); <sup>13</sup>C-NMR (100.6 MHz): 163.5, 162.8, 150.2, 148.2, 141.1, 137.4, 130.3, 124.2, 123.6, 115.1, 63.6, 63.5, 47.6, 35.2, 31.2, 13.9, 13.8; IR (NaCl) / cm<sup>-1</sup>: 2245 s, 1740 s; HRMS: *m/z* found [M+Na]<sup>+</sup> 432.1172, C<sub>21</sub>H<sub>19</sub>N<sub>3</sub>O<sub>6</sub> requires 409.1274.

**(2*R*,3*R*)-Diethyl 3-(2-chlorophenyl)-2-cyano-2-(pyridin-4-yl)cyclopropane-1,1-dicarboxylate (12l)**

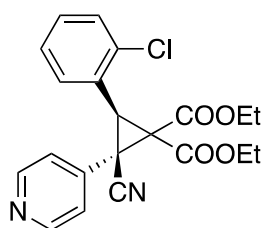

Prepared following general procedure using (*Z*)-3-(2-chlorophenyl)-2-(pyridin-4-yl)acrylonitrile **11** (24.1 mg, 0.10 mmol) and catalyst **11**. Reaction time: 144 h. Column chromatography (Solvents DCM:Et<sub>2</sub>O 7:3) afforded **12l** as a yellow oil (27.5 mg, 69% yield).

The *ee* of the product was determined by CSP-HPLC using a Chiralpak AS column (*n*-hexane/*i*-PrOH 95:5, flow rate 0.75 mL/min, *t*<sub>maj</sub> = 21.76 min, *t*<sub>min</sub> = 29.11 min, 52% *ee*); [ $\alpha$ ]<sub>D</sub><sup>20</sup> = +5 (c = 0.35 in CHCl<sub>3</sub>); <sup>1</sup>H-NMR (400 MHz, CDCl<sub>3</sub>): 8.69 (d, *J* = 5.9 Hz, 2H), 7.55-7.47 (m, 4H), 7.38-7.29 (m, 2H), 4.26 (qd, *J* = 7.1, 1.7 Hz, 2H), 4.09 (s, 1H), 4.01-3.84 (m, 2H), 1.21 (t, *J* = 7.1 Hz, 3H), 0.98 (t, *J* = 7.1 Hz, 3H); <sup>13</sup>C-NMR (100.6 MHz): 163.8, 163.4, 149.9, 141.6, 135.7, 130.3, 130.2, 129.9, 128.7, 127.2, 123.8, 115.6, 63.2, 63.1, 47.6, 34.8, 31.7, 13.8, 13.7; IR (NaCl) / cm<sup>-1</sup>: 2235 s, 1742 s; HRMS: *m/z* found [M+Na]<sup>+</sup> 421.0918, C<sub>21</sub>H<sub>19</sub>ClN<sub>2</sub>O<sub>4</sub> requires 398.1033.

**(2*R*,3*R*)-Diethyl 2-cyano-3-hexyl-2-(pyridin-4-yl)cyclopropane-1,1-dicarboxylate (12m)**

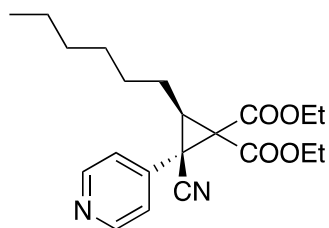

Prepared following general procedure using (*Z*)-2-(4-pyridyl)non-2-enenitrile **1m** (21.4 mg, 0.10 mmol) and catalyst **11**. Reaction time: 168 h. Column chromatography (Solvents DCM:Et<sub>2</sub>O 7:3) afforded **12m** as a yellow oil (34.3 mg, 92% yield). The *ee* of the product was determined by CSP-HPLC using a Chiralpak AD column (*n*-hexane/*i*-PrOH 90:10, flow rate 0.75 mL/min,  $t_{\text{maj}} = 9.86$  min,  $t_{\text{min}} = 8.79$  min, 82% *ee*);  $[\alpha]_{\text{D}}^{20} = +32$  ( $c = 0.45$  in CHCl<sub>3</sub>); <sup>1</sup>H-NMR (400 MHz, CDCl<sub>3</sub>): 8.62 (d,  $J = 6.0$  Hz, 2H), 7.29 (d,  $J = 4.4$  Hz, 2H), 4.36-4.26 (m, 2H), 3.95-3.87 (m, 2H), 2.70 (t,  $J = 7.2$  Hz, 1H), 1.64-1.59 (m, 1H), 1.45-1.41 (m, 2H), 1.37-1.29 (m, 10H), 0.97 (t,  $J = 7.2$  Hz, 3H), 0.88 (t,  $J = 6.8$  Hz, 3H); <sup>13</sup>C-NMR (100.6 MHz): 164.3, 163.8, 150.4, 129.1, 123.7, 116.1, 63.3, 62.8, 46.3, 42.5, 32.7, 31.6, 31.0, 29.0, 28.3, 26.2, 22.6, 14.1, 14.0; IR (NaCl) / cm<sup>-1</sup>: 2243 s, 1744 s; HRMS:  $m/z$  found [M+H]<sup>+</sup> 373.2134, C<sub>21</sub>H<sub>29</sub>N<sub>2</sub>O<sub>4</sub> requires 373.2127.

**(2*R*,3*R*)-Diethyl 2-cyano-3-heptyl-2-(pyridin-4-yl)cyclopropane-1,1-dicarboxylate (12n)**

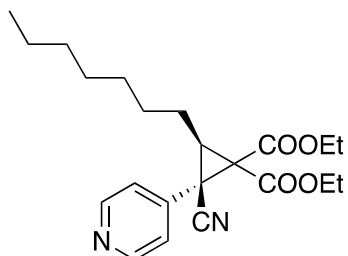

Prepared following general procedure using (*Z*)-2-(4-pyridyl)dec-2-enenitrile **1n** (22.8 mg, 0.10 mmol) and catalyst **11**. Reaction time: 192 h. Column chromatography (Solvents DCM:Et<sub>2</sub>O 7:3) afforded **12n** as a yellow oil (27.0 mg, 70% yield). The *ee* of the product was determined by CSP-HPLC using a Chiralpak AD column (*n*-hexane/*i*-PrOH 90:10, flow rate 0.75 mL/min,  $t_{\text{maj}} = 9.64$  min,  $t_{\text{min}} = 8.35$  min, 83% *ee*);  $[\alpha]_{\text{D}}^{20} = +16$  ( $c = 0.22$  in CHCl<sub>3</sub>); <sup>1</sup>H-NMR (400 MHz, CDCl<sub>3</sub>): 8.62 (d,  $J = 4.4$  Hz, 2H), 7.29 (d,  $J = 4.4$  Hz, 2H), 4.40-4.31 (m, 2H), 3.94-3.84 (m, 2H), 2.70 (t,  $J = 7.4$  Hz, 1H), 1.90-1.86 (m, 1H), 1.73-1.59 (m, 4H), 1.47-1.42 (m, 2H), 1.35 (t,  $J = 7.0$  Hz, 3H), 1.31-1.29 (m, 5H), 0.97 (t,  $J = 7.2$  Hz, 3H), 0.88 (t,  $J = 6.8$  Hz, 3H); <sup>13</sup>C-NMR (100.6 MHz): 164.3, 163.8, 150.4, 140.9, 123.7, 116.1, 62.9, 62.8,

46.3, 32.7, 31.8, 31.0, 29.3, 29.2, 28.4, 26.3, 22.7, 14.2, 14.1, 13.7; IR (NaCl) /  $\text{cm}^{-1}$ : 2245 s, 1746 s; HRMS:  $m/z$  found  $[\text{M}+\text{H}]^+$  387.2288,  $\text{C}_{22}\text{H}_{31}\text{N}_2\text{O}_4$  requires 387.2284.

**(2*R*,3*R*)-Diethyl 2-cyano-3-ethyl-2-(pyridin-4-yl)cyclopropane-1,1-dicarboxylate (12o)**

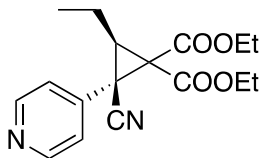

Prepared following general procedure using (*Z*)-2-(pyridin-4-yl)pent-2-enitrile **1o** (15.8 mg, 0.10 mmol) and catalyst **11**. Reaction time: 192 h. Column chromatography (Solvents DCM:Et<sub>2</sub>O 7:3) afforded **12o** as a yellow oil (19.8 mg, 68% yield).

The *ee* of the product was determined by CSP-HPLC using a Chiralpak AD column (*n*-hexane/*i*-PrOH 95:5, flow rate 0.50 mL/min,  $t_{\text{maj}}$  = 16.02 min,  $t_{\text{min}}$  = 15.03 min, 21% *ee*);  $[\alpha]_{\text{D}}^{20}$  = +10 ( $c$  = 0.20 in  $\text{CHCl}_3$ ); <sup>1</sup>H-NMR (400 MHz,  $\text{CDCl}_3$ ): 8.62 (d,  $J$  = 6.1 Hz, 2H), 7.30 (d,  $J$  = 6.2 Hz, 2H), 4.41-4.31 (m, 2H), 3.95-3.85 (m, 2H), 2.67 (dd,  $J$  = 8.7, 6.2 Hz, 1H), 1.98-1.89 (m, 1H), 1.80-1.69 (m, 1H), 1.35 (t,  $J$  = 7.1 Hz, 3H), 1.25 (t,  $J$  = 7.4 Hz, 3H), 0.98 (t,  $J$  = 7.1 Hz, 3H); <sup>13</sup>C-NMR (100.6 MHz): 164.3, 163.8, 150.5, 141.0, 123.7, 116.0, 62.9, 62.8, 46.5, 34.2, 30.9, 19.9, 14.1, 13.8, 12.7; IR (NaCl) /  $\text{cm}^{-1}$ : 2240 s, 1736 s; HRMS:  $m/z$  found  $[\text{M}+\text{H}]^+$  317.1516,  $\text{C}_{17}\text{H}_{20}\text{N}_2\text{O}_4$  requires 316.1423.

**Procedure for the preparation of 3-phenyl-2-pyridin-4-yl-cyclopropane-1,1,2-tricarboxylic acid diethyl ester 16**

To a solution of (*2R,3R*)-diethyl 2-cyano-3-phenyl-2-(4-pyridyl)cyclopropane-1,1-dicarboxylate **12a** (30.0 mg, 0.09 mmol, 1.0 eq) in 500  $\mu\text{L}$  of water, NaOH was added (16.0 mg, 0.4 mmol, 4.5 eq) and the mixture was refluxed for 24 h. After cooling to 0  $^{\circ}\text{C}$ , concentrated hydrochloric acid was added until the solution was neutral and the solvent was removed *in vacuo* affording the title compound **16** as a white solid in 98% yield (28.5 mg). m.p. 127-129 $^{\circ}\text{C}$ .



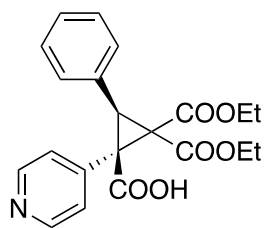

$[\alpha]_D^{20} = +26$  ( $c = 0.50$  in  $\text{CHCl}_3$ );  $^1\text{H-NMR}$  (400 MHz,  $\text{CD}_3\text{OD}$ ): 8.51 (d,  $J = 4.8$  Hz, 2H), 7.71 (d,  $J = 4.8$  Hz, 1H), 7.66-7.61 (m, 2H), 7.55-7.49 (m, 1H), 7.40-7.37 (m, 1H), 7.35 (t,  $J = 7.2$  Hz, 1H), 7.28 (t,  $J = 7.4$  Hz, 1H), 4.21 (dq,  $J = 7.2$  Hz,  $J = 1.6$  Hz, 2H), 4.01-3.90 (m, 2H), 3.37 (s, 1H), 1.16 (t,  $J = 7.2$  Hz, 3H), 1.01 (t,  $J = 7.2$  Hz, 3H);  $^{13}\text{C-NMR}$  (100.6 MHz): 185.1, 174.9, 174.5, 150.1, 144.2, 134.5, 130.2, 129.8, 129.1, 126.7, 63.1, 63.0, 54.8, 51.8, 45.4, 13.9, 13.8; IR (NaCl) /  $\text{cm}^{-1}$ : 2239, 1724 s, 1705 s; HRMS:  $m/z$  found  $[\text{M}+\text{H}]^+$  384.1441,  $\text{C}_{21}\text{H}_{22}\text{NO}_6$  requires 384.1447.

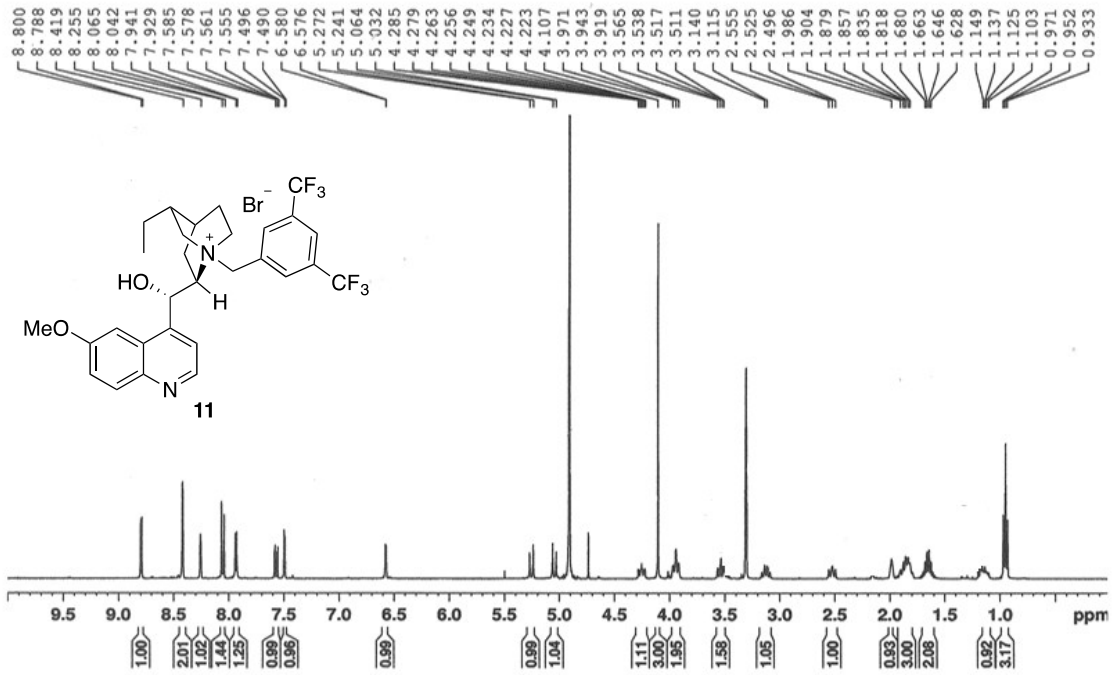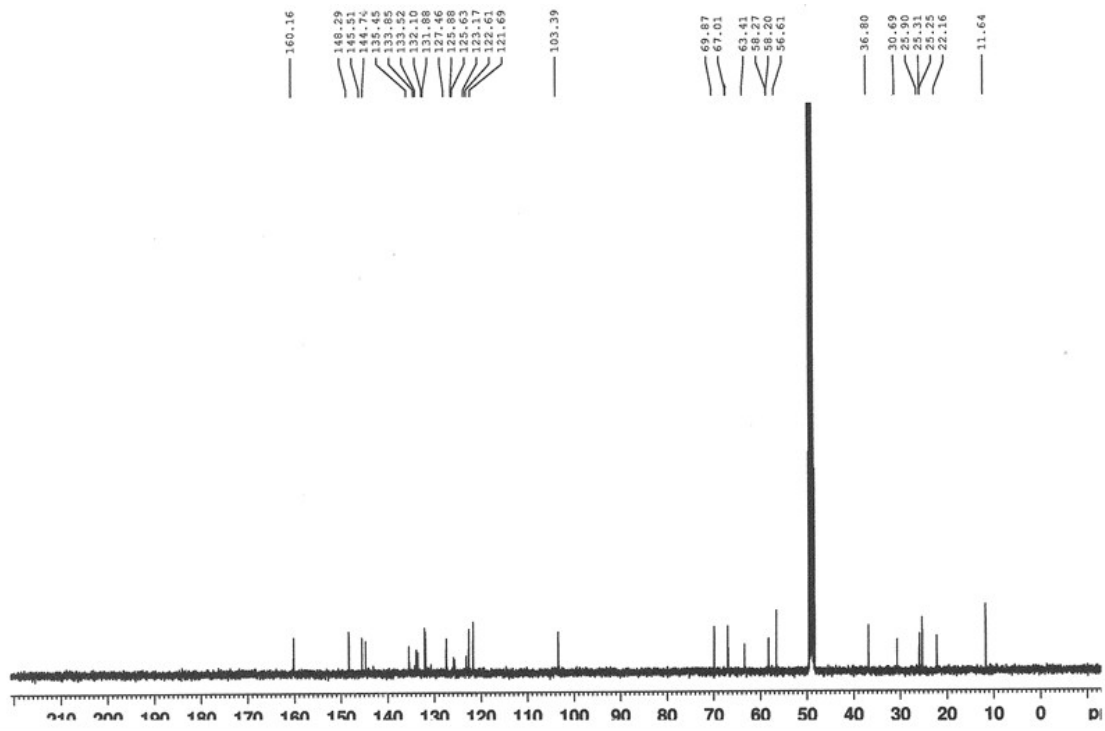

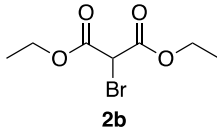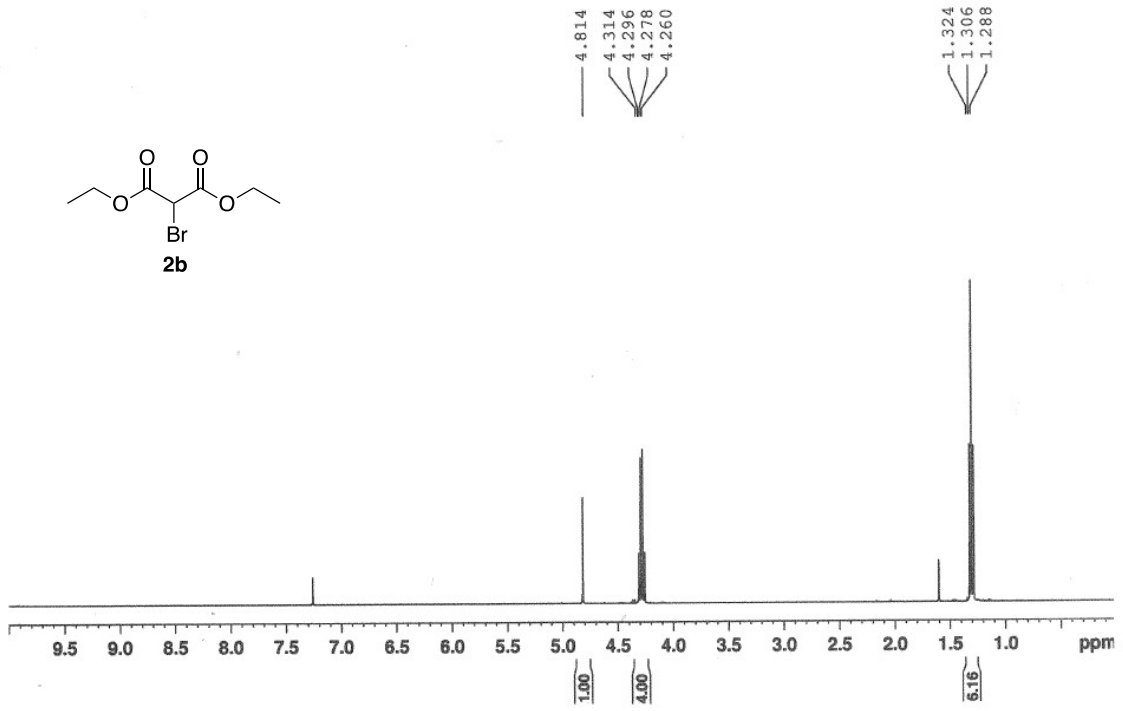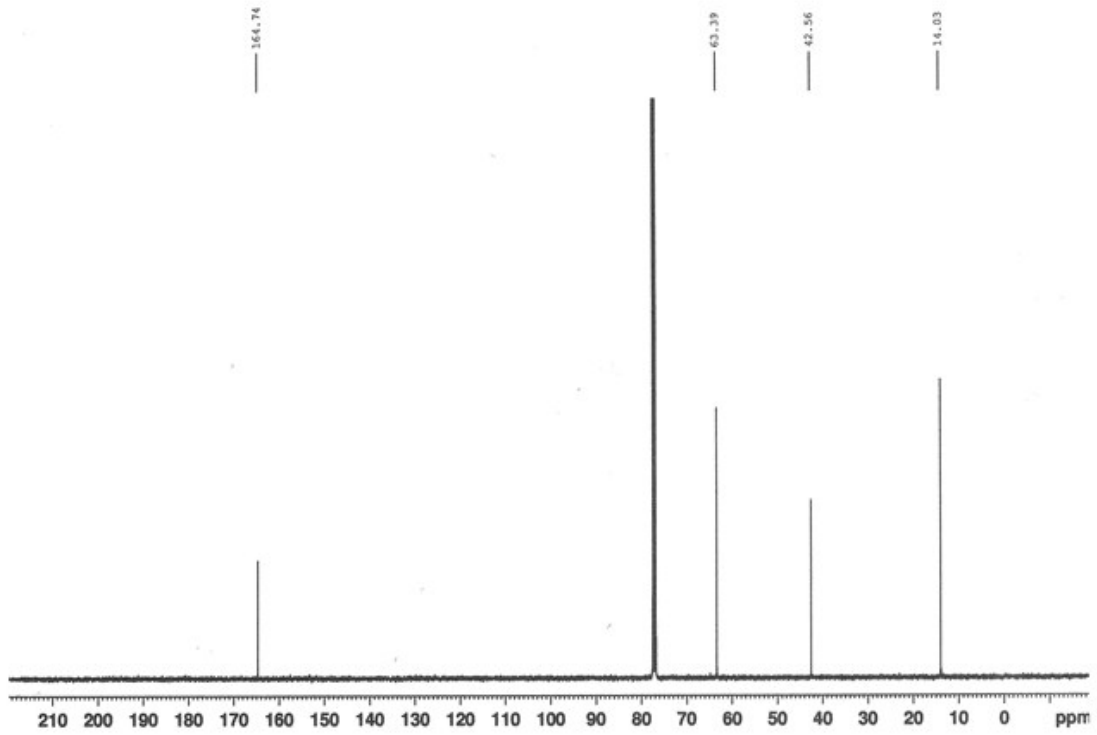

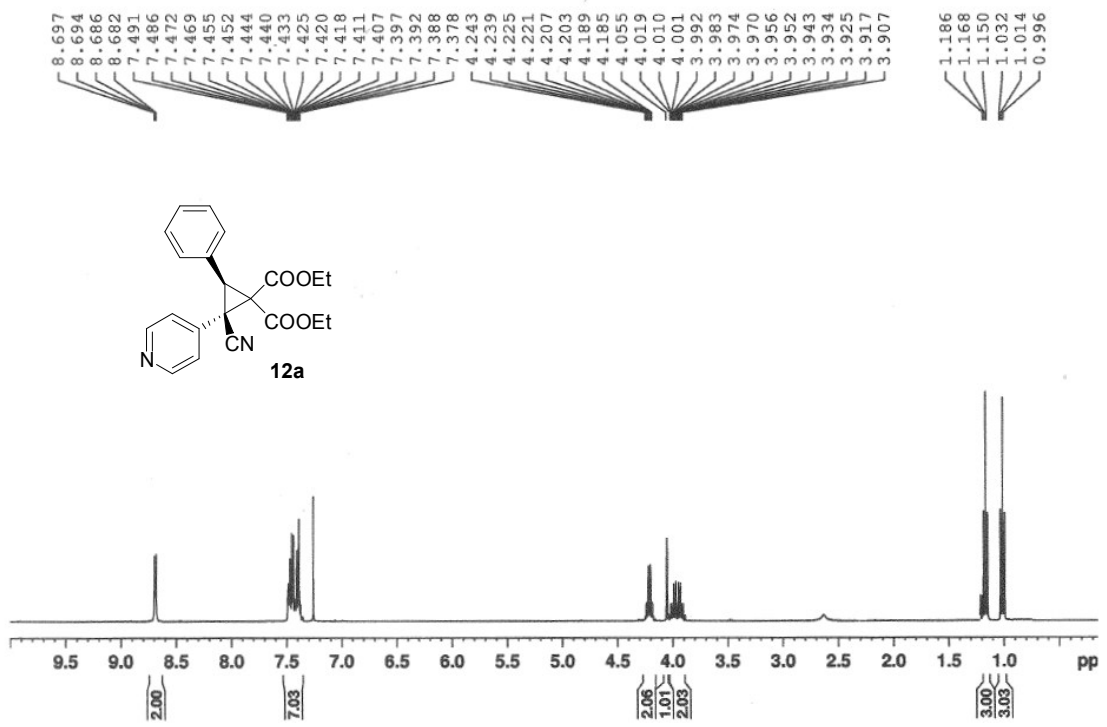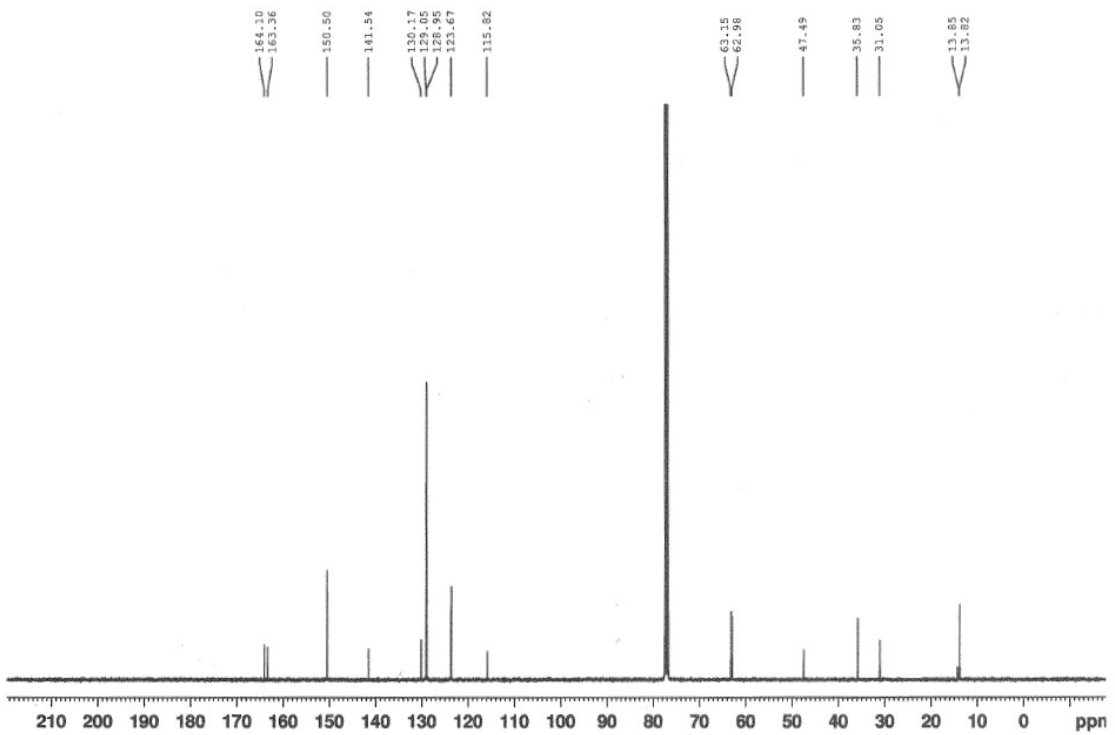

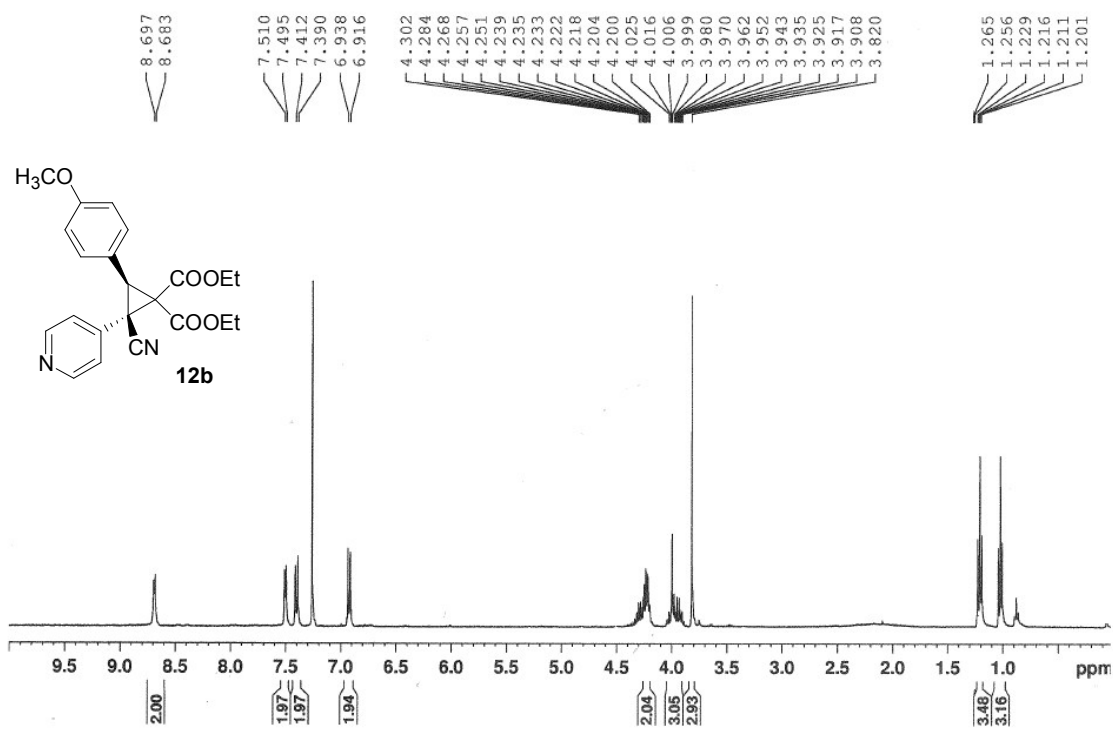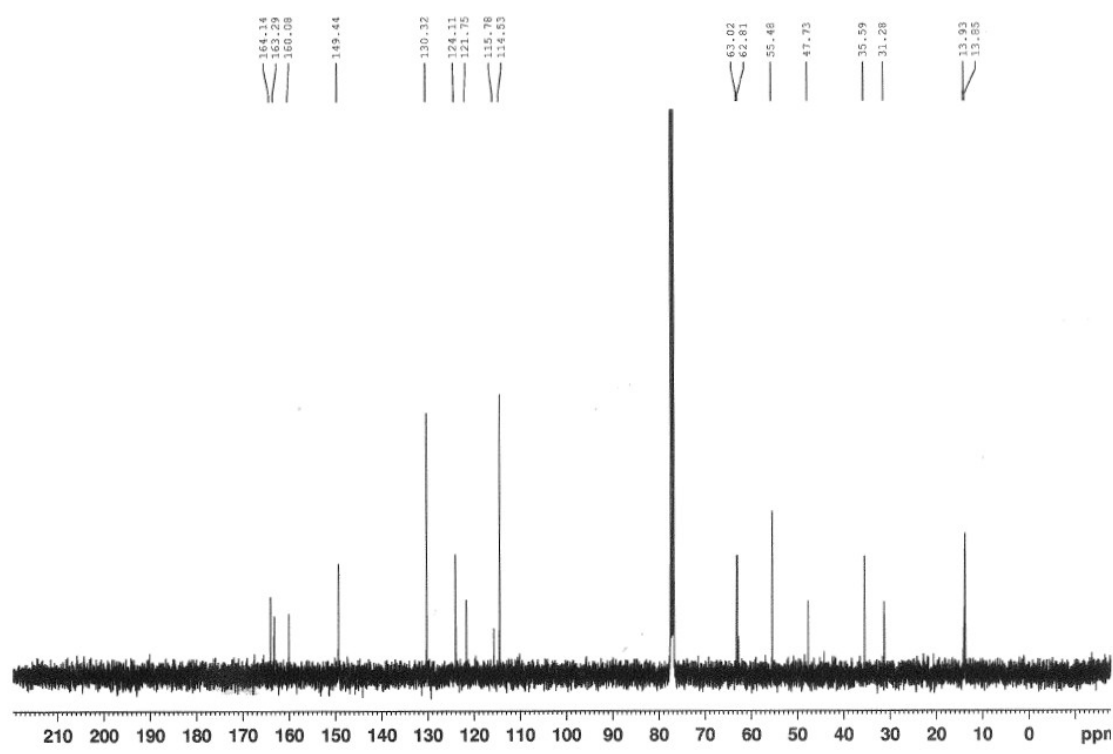

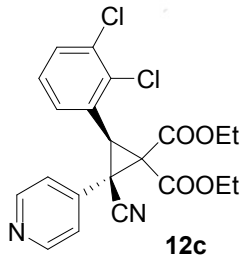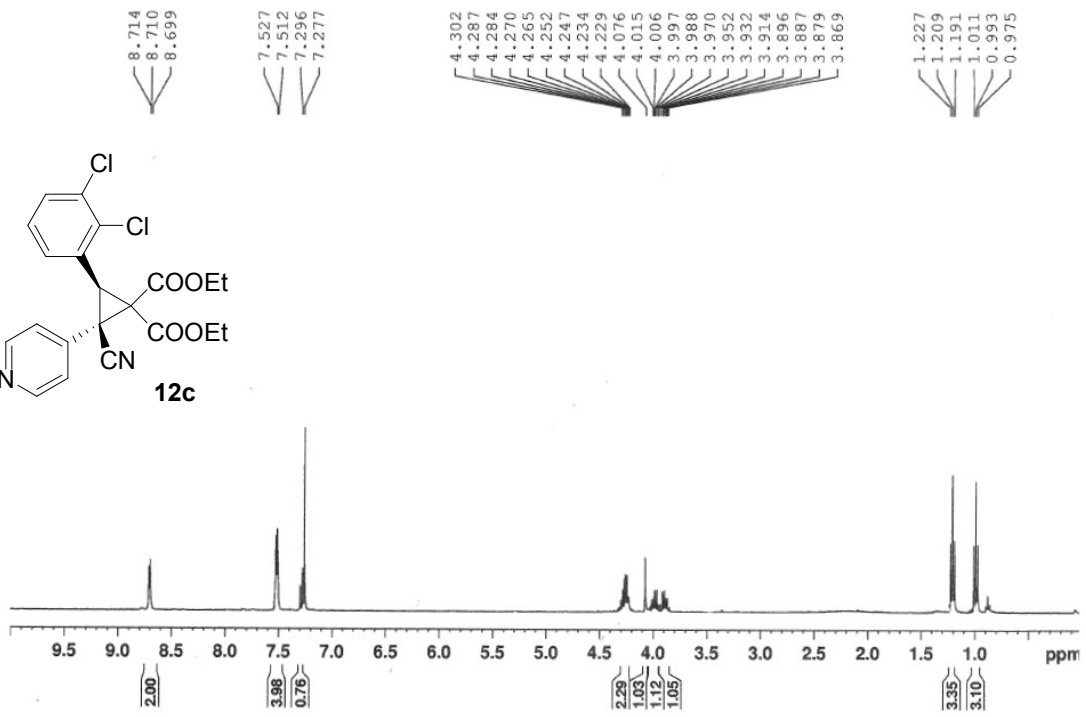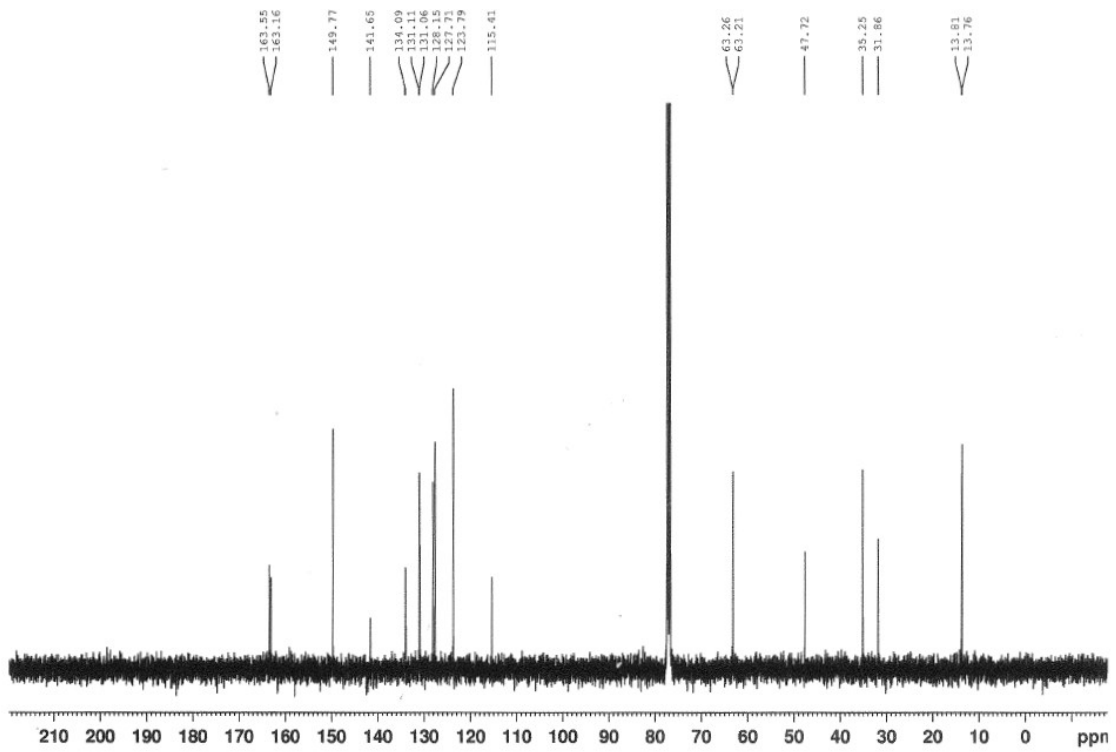

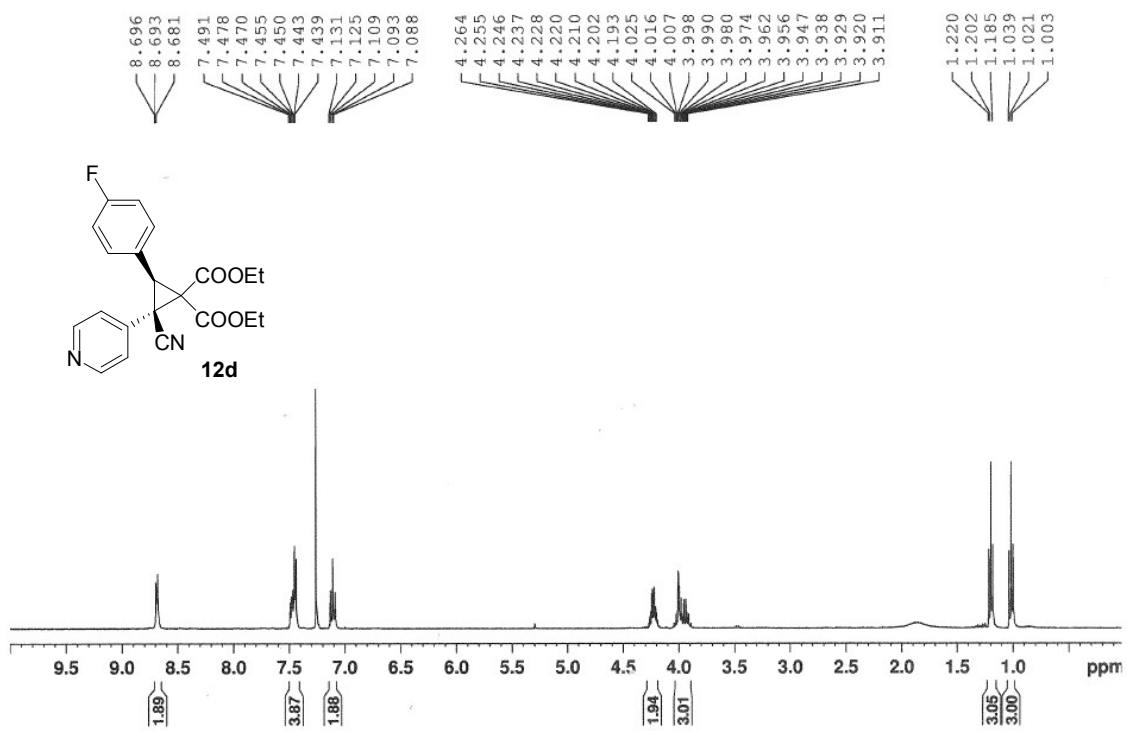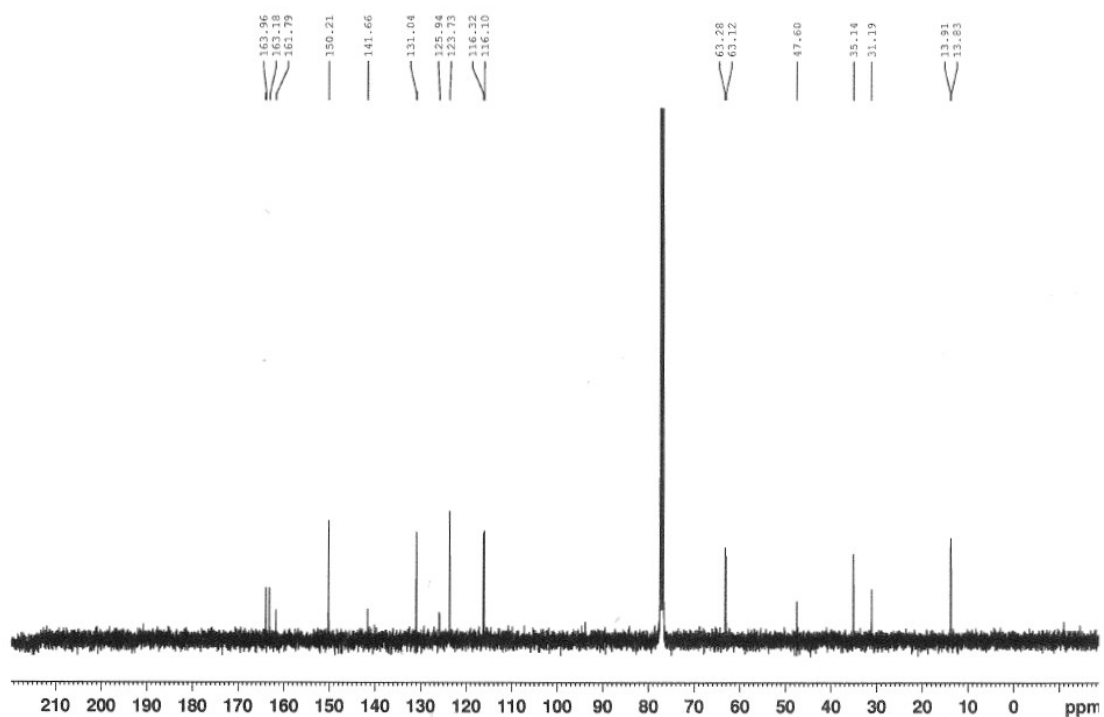

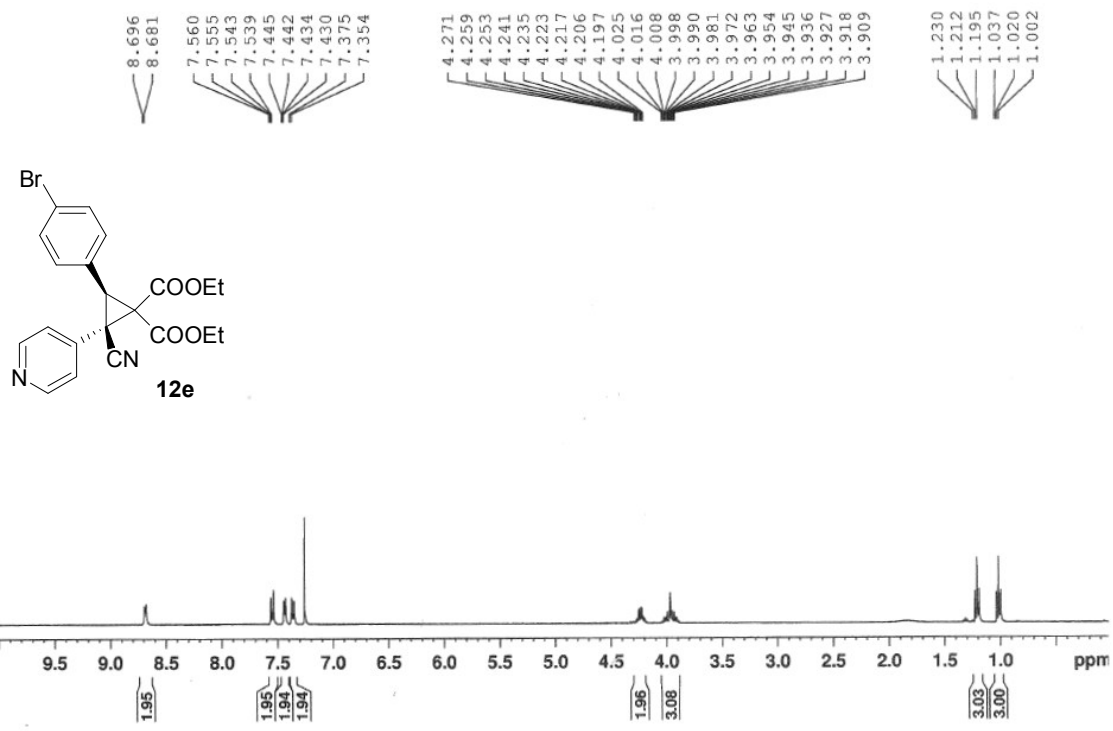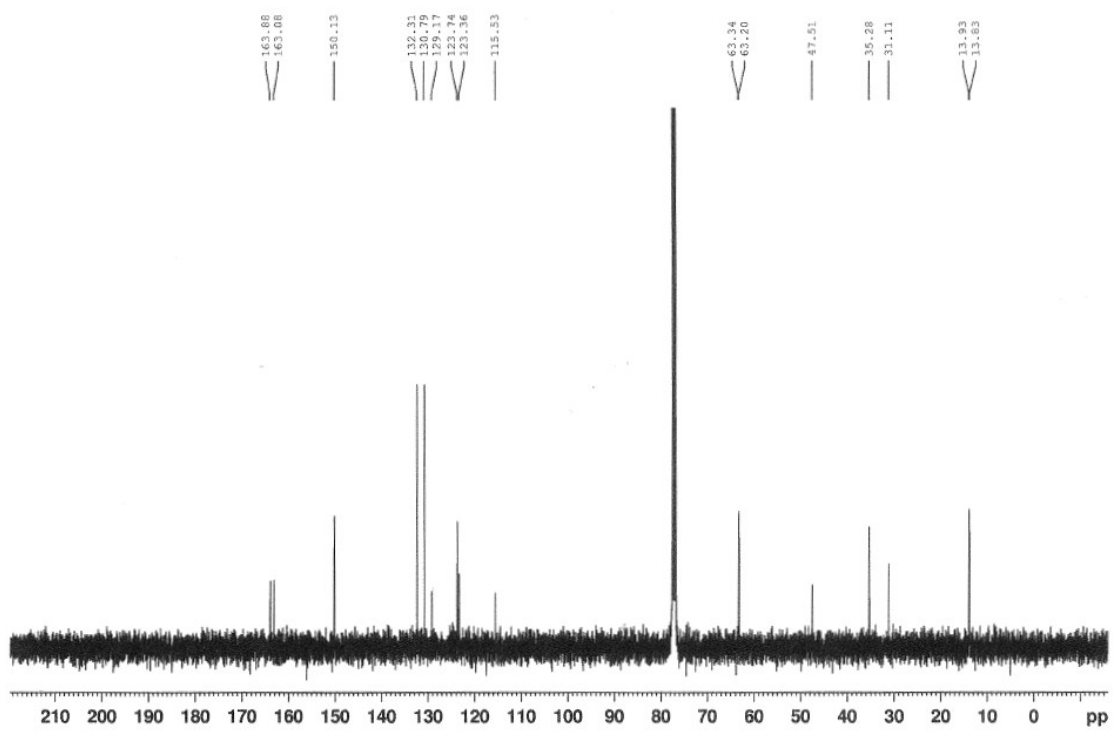



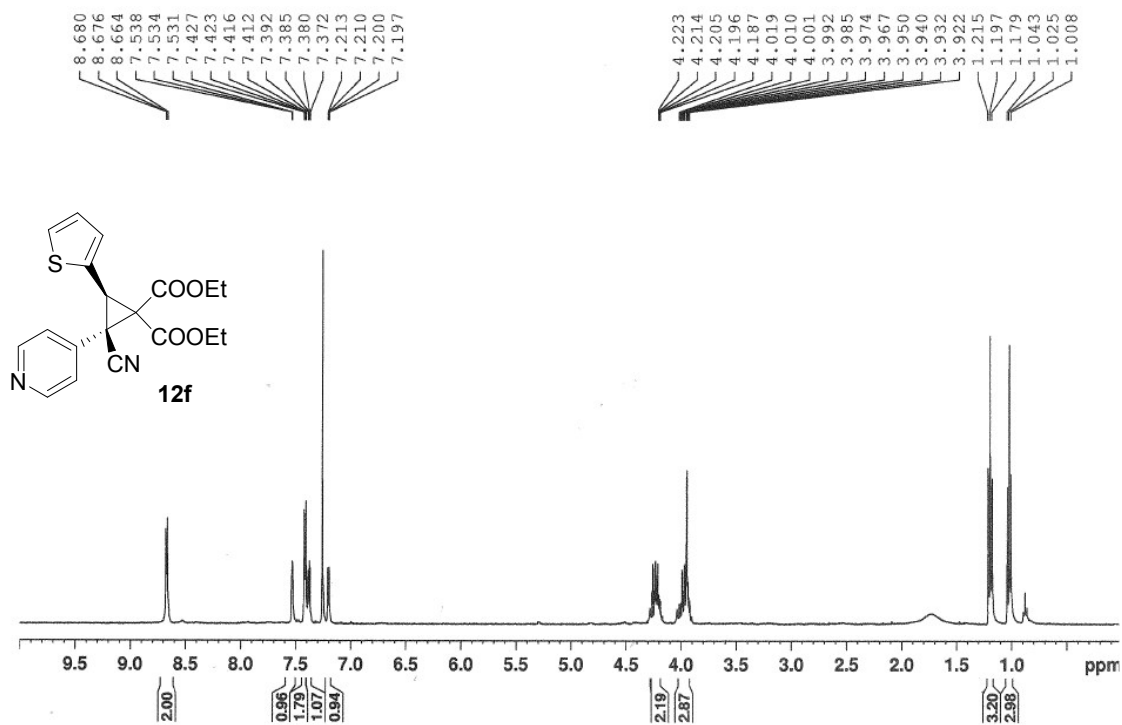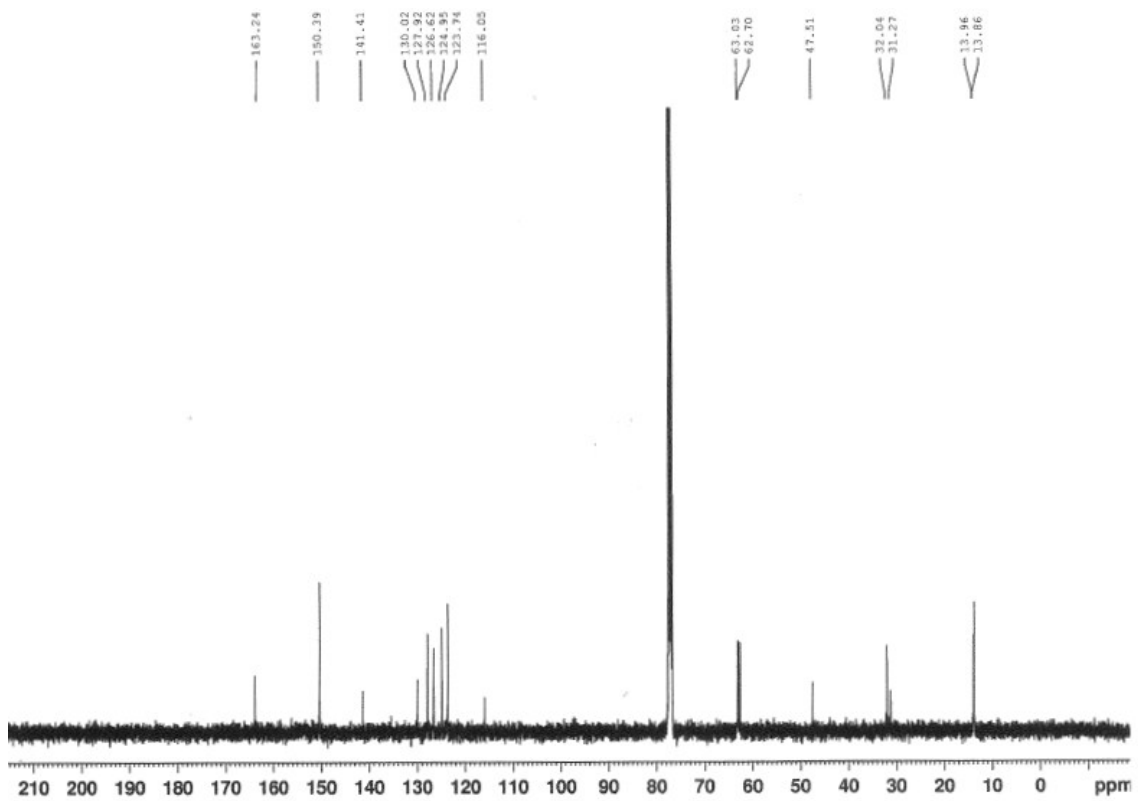

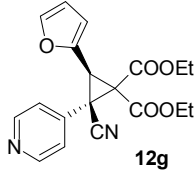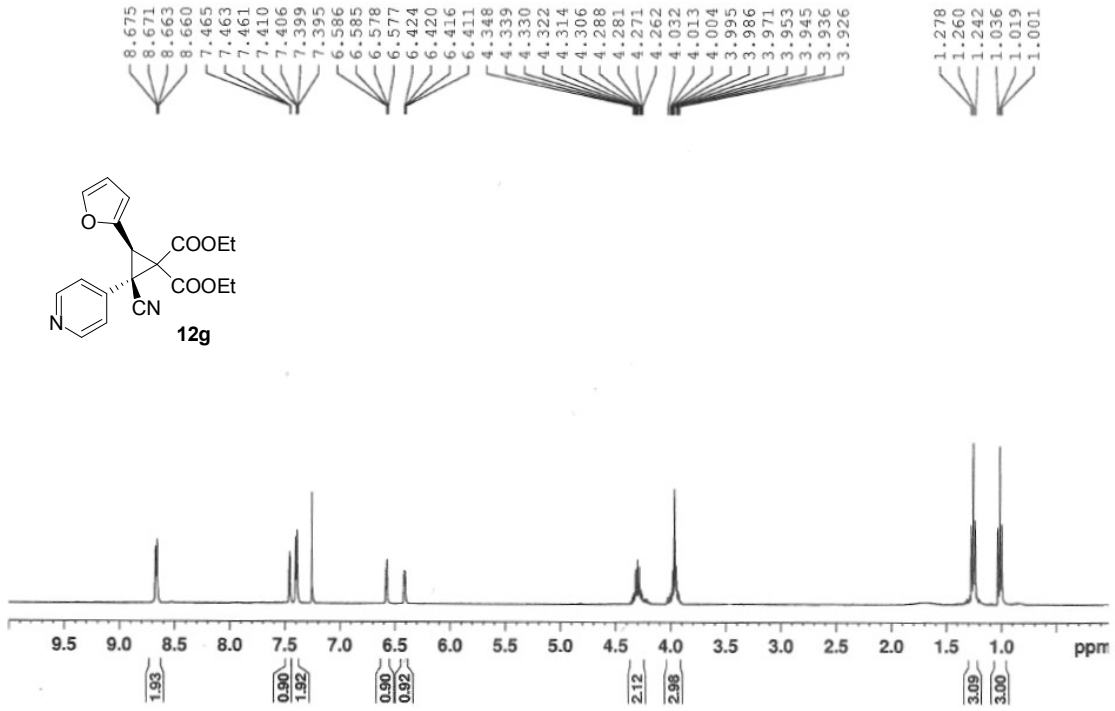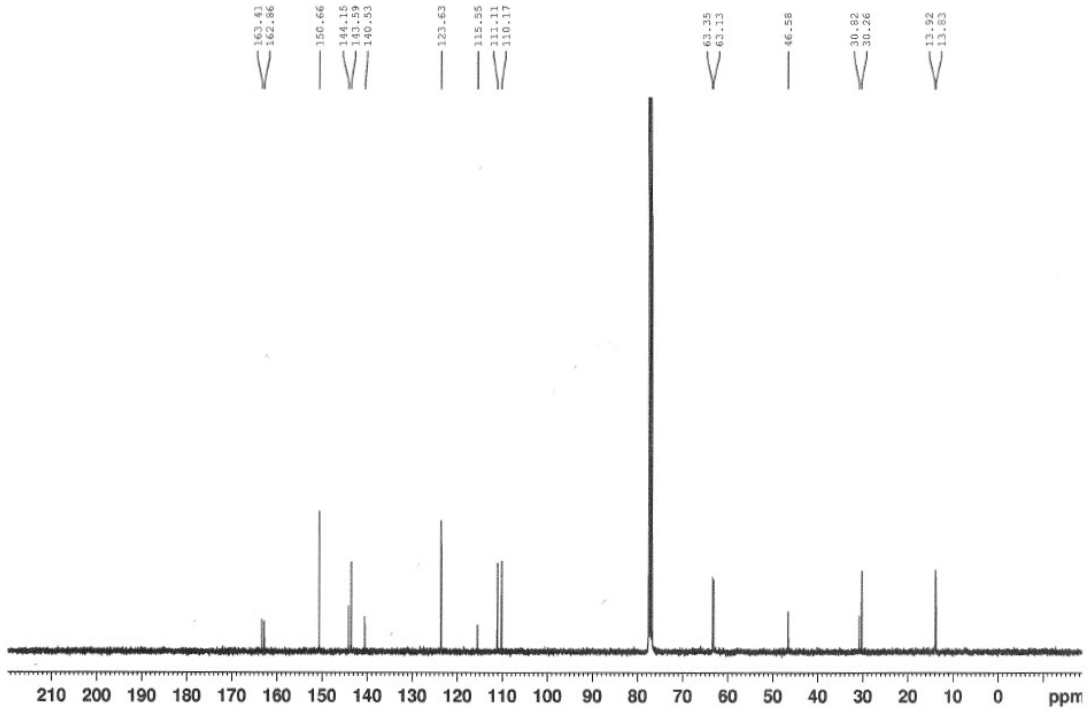

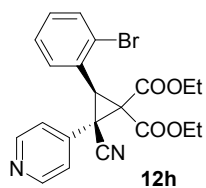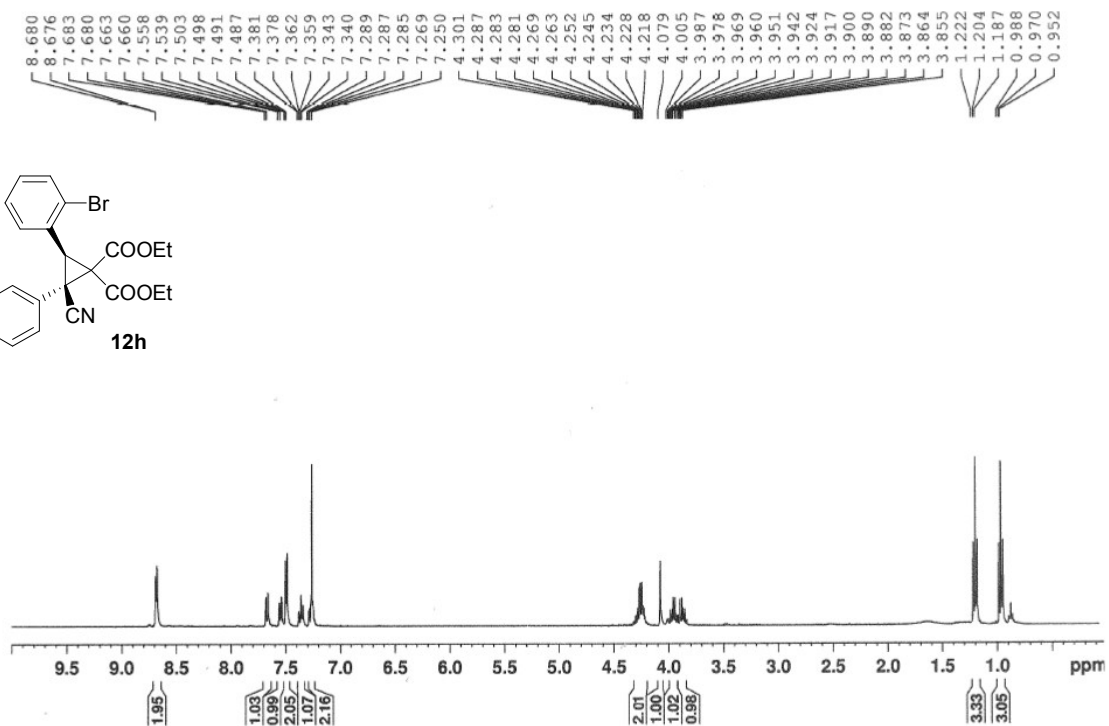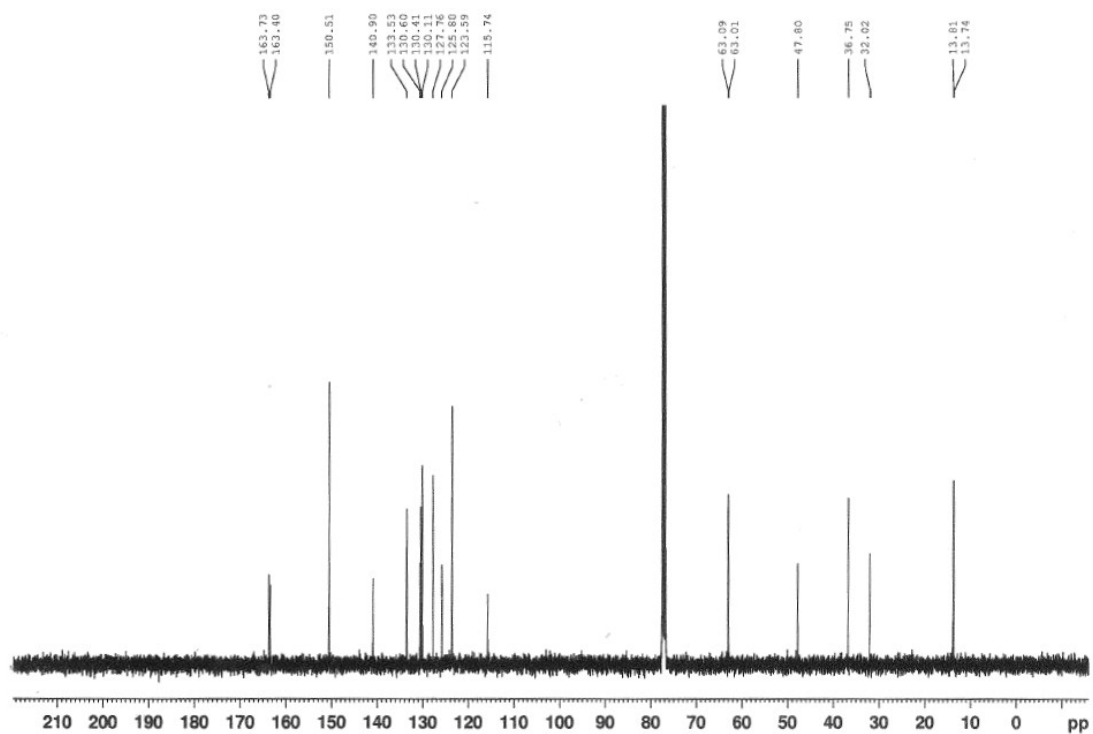

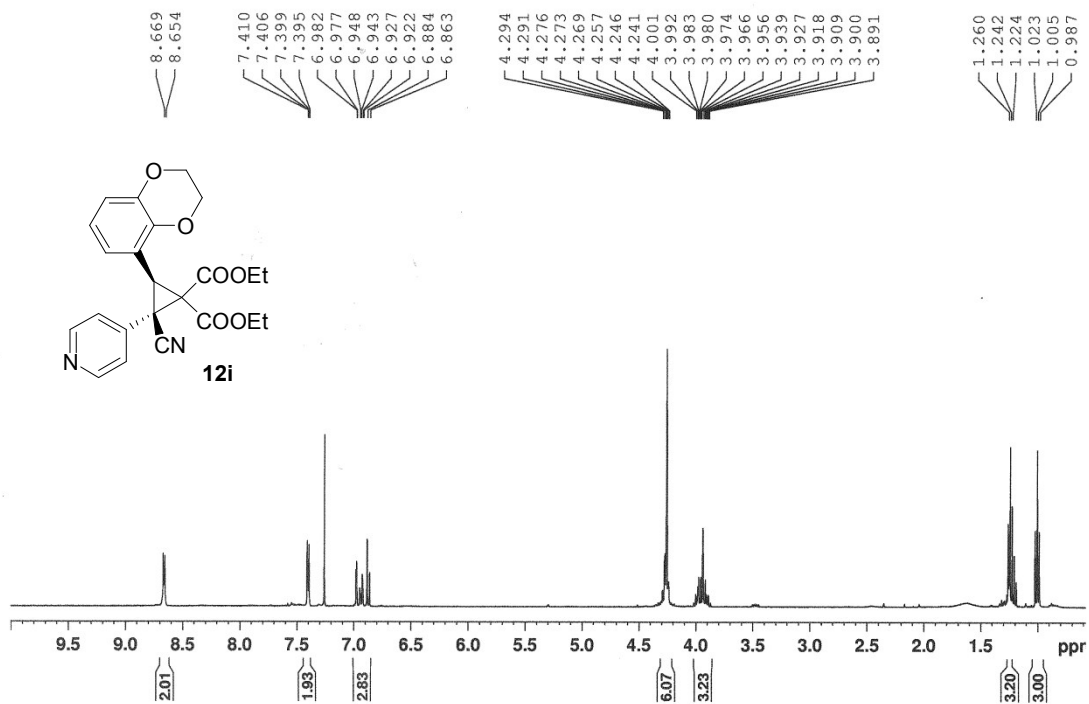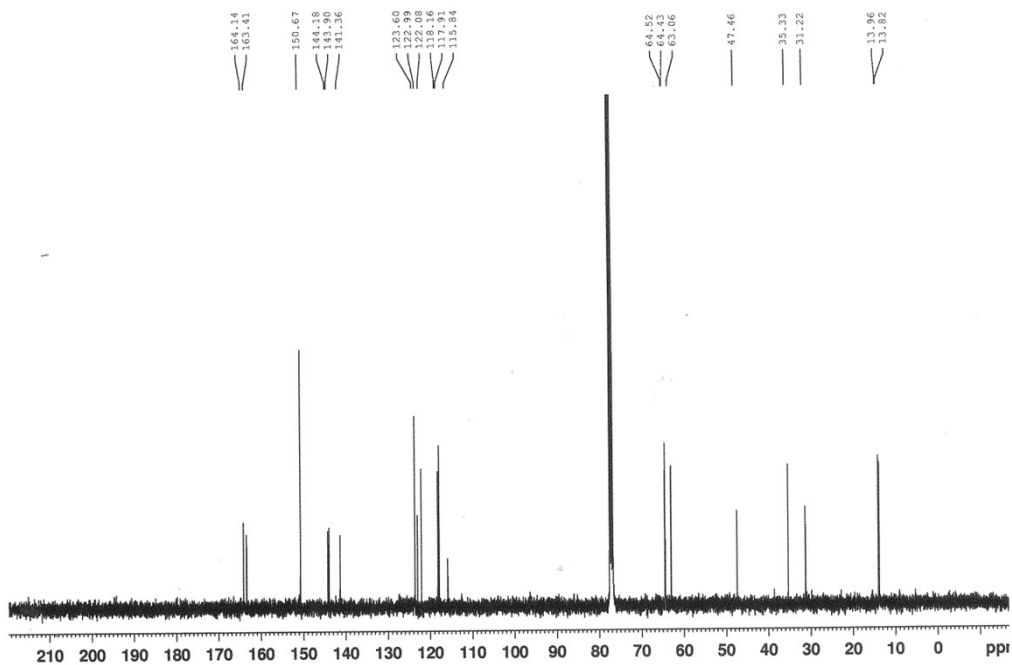

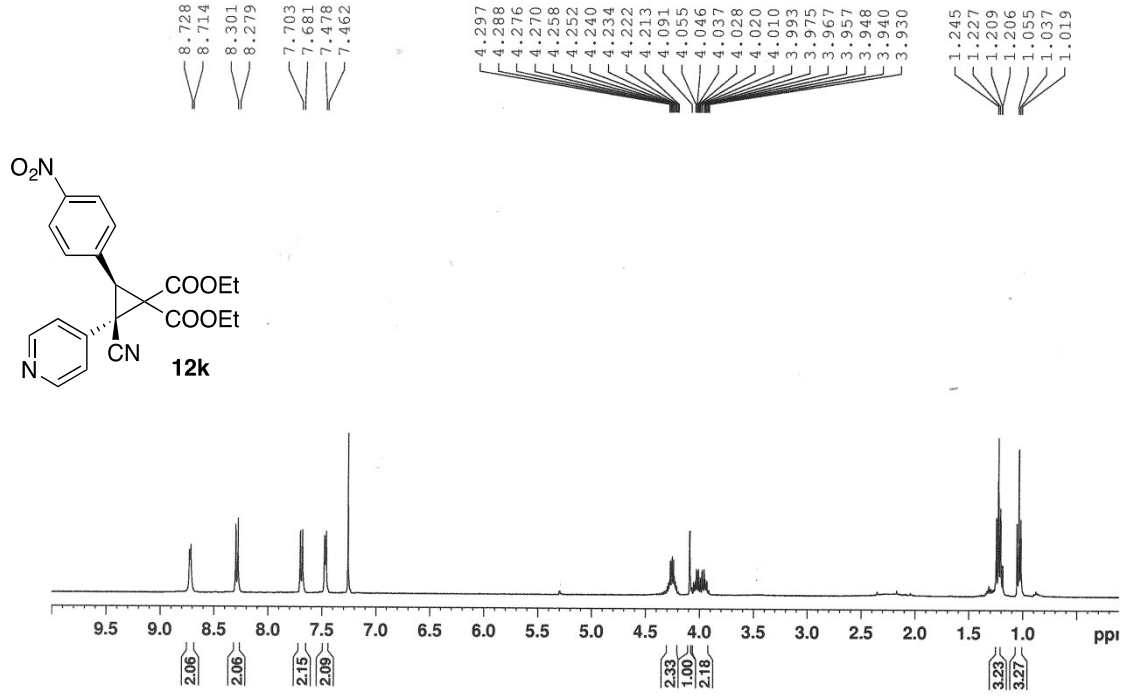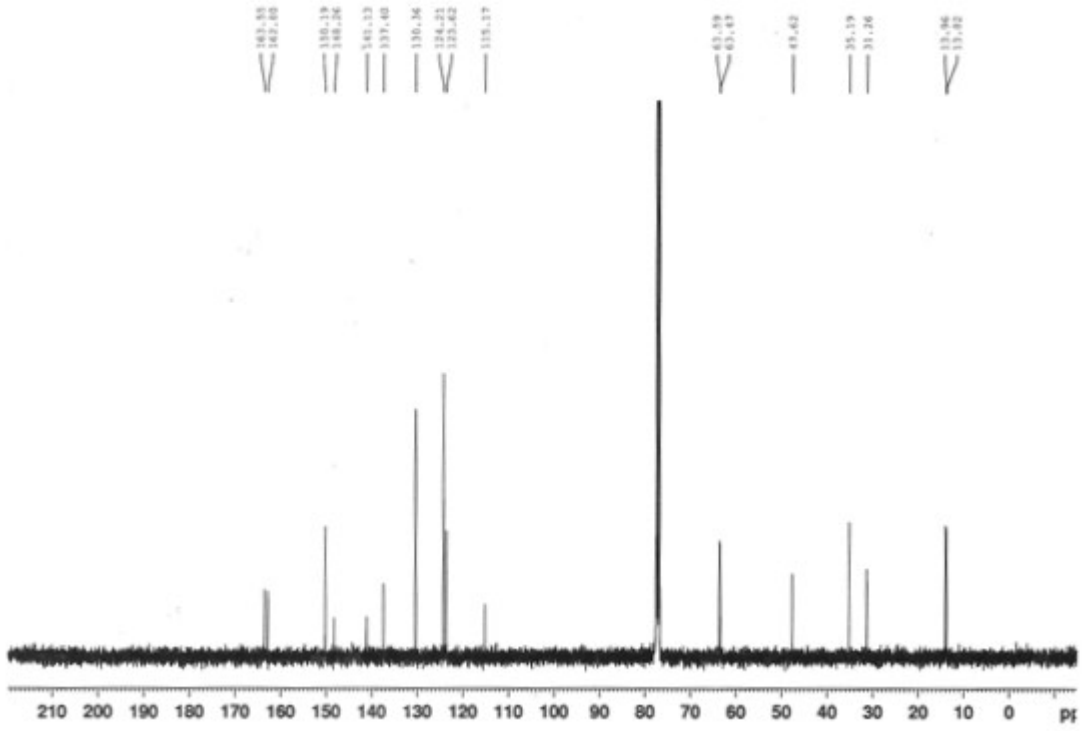

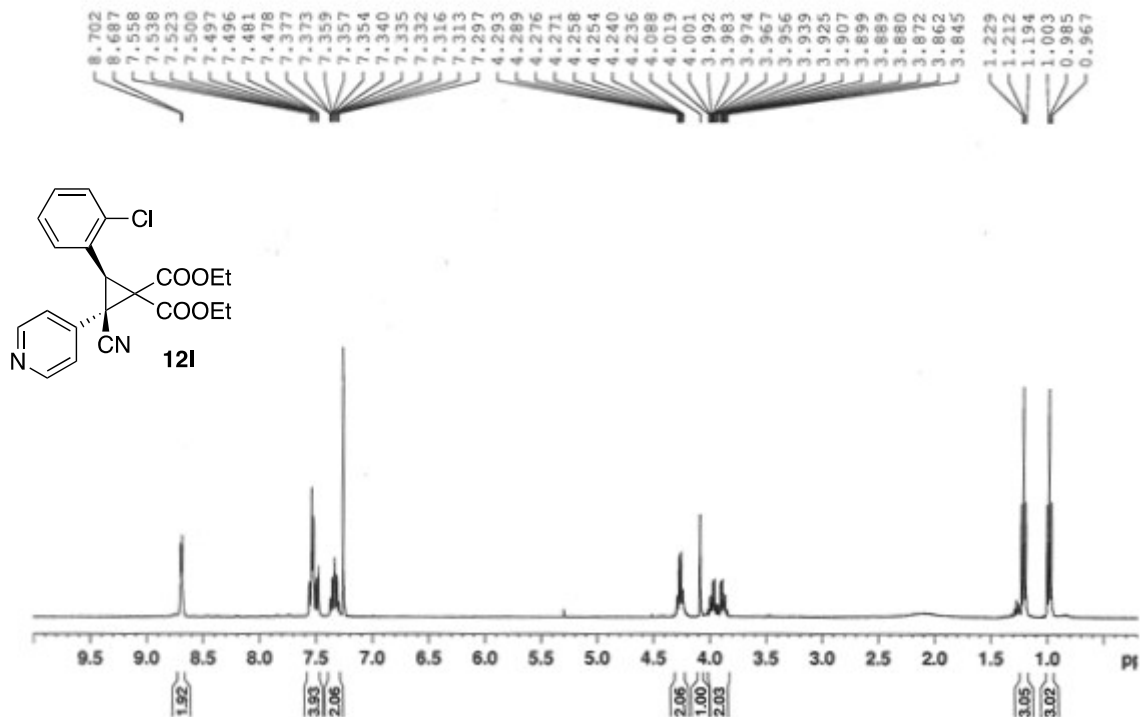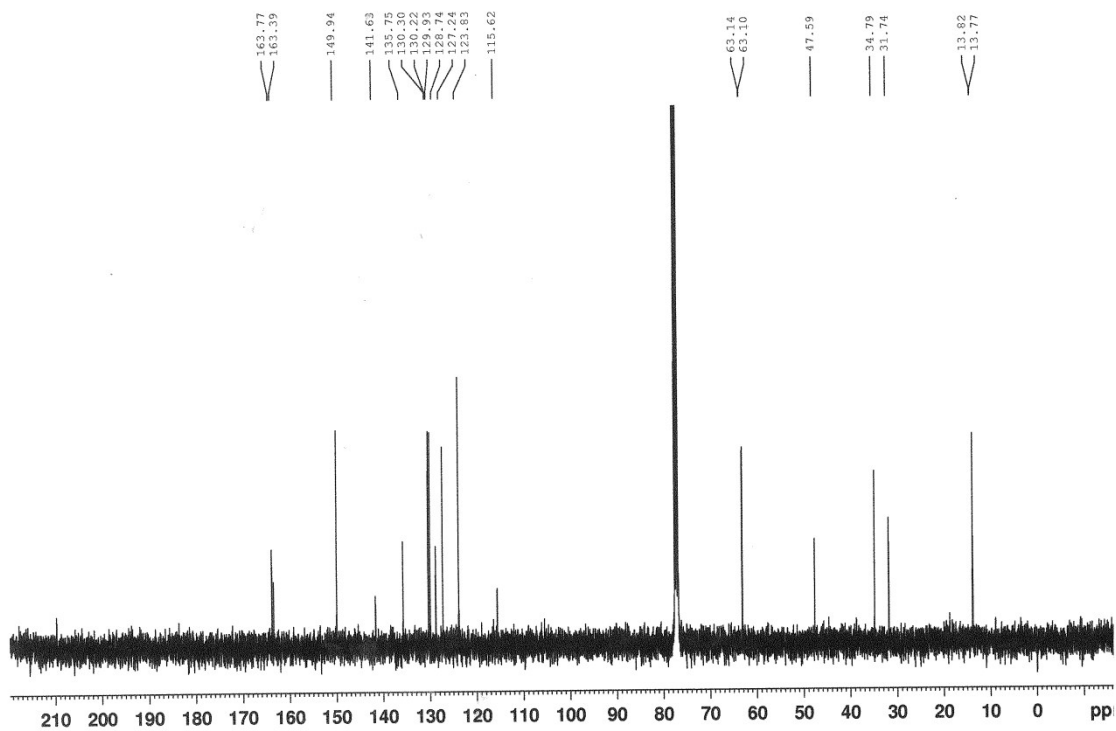

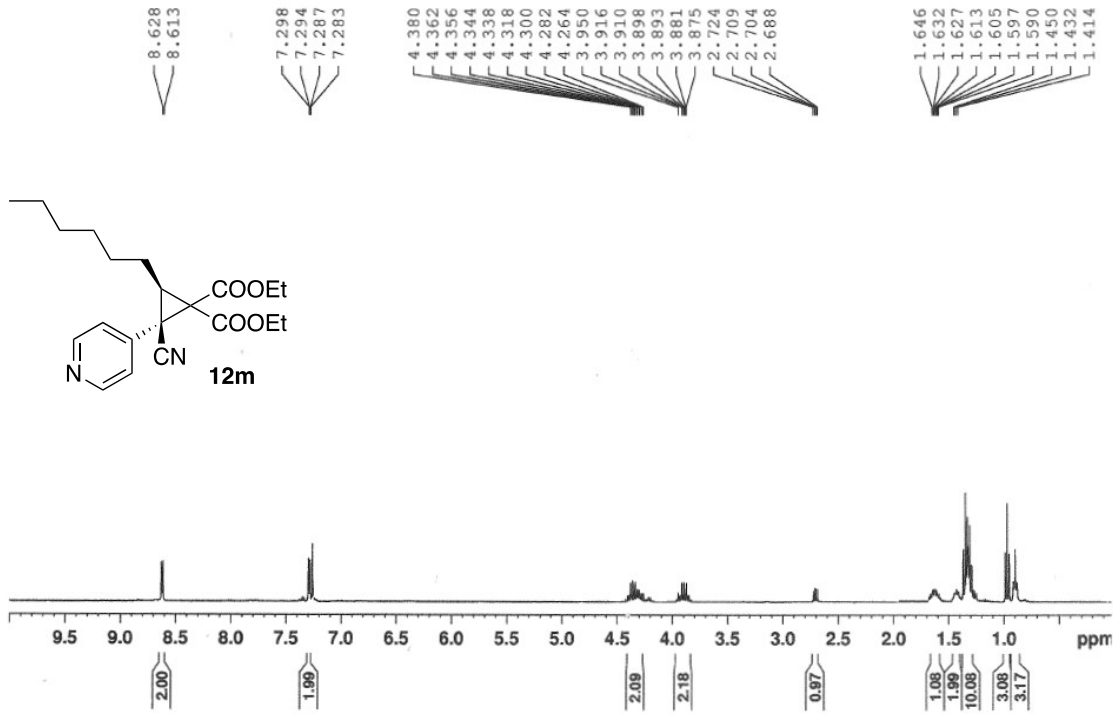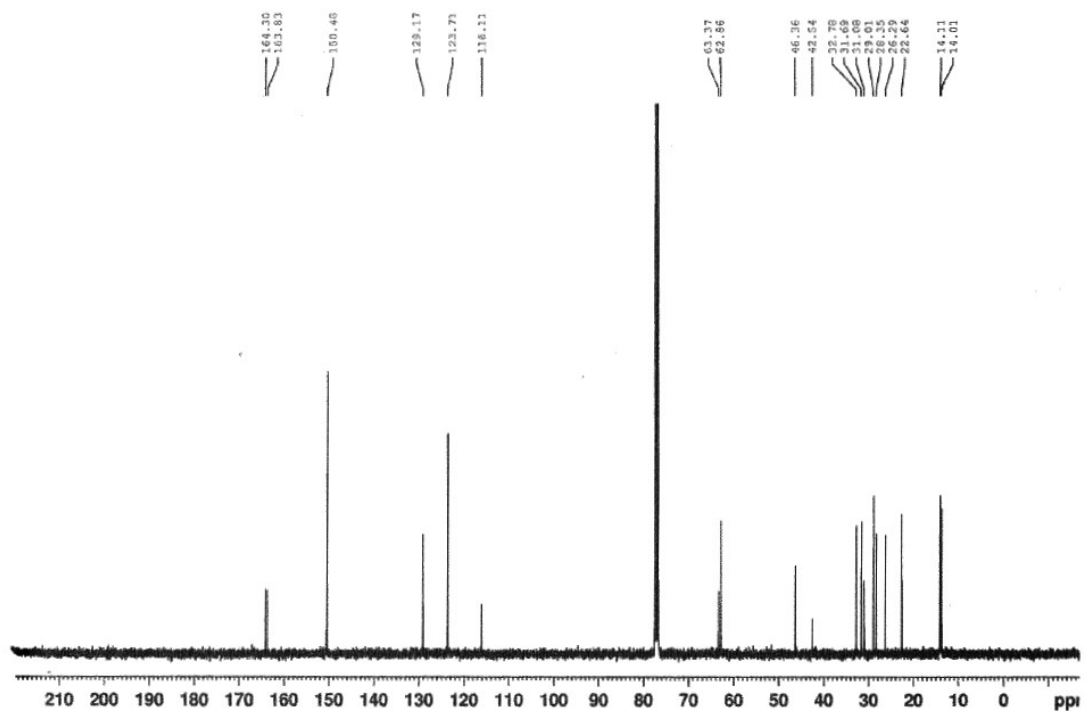

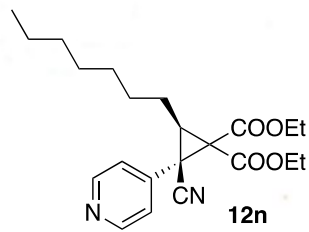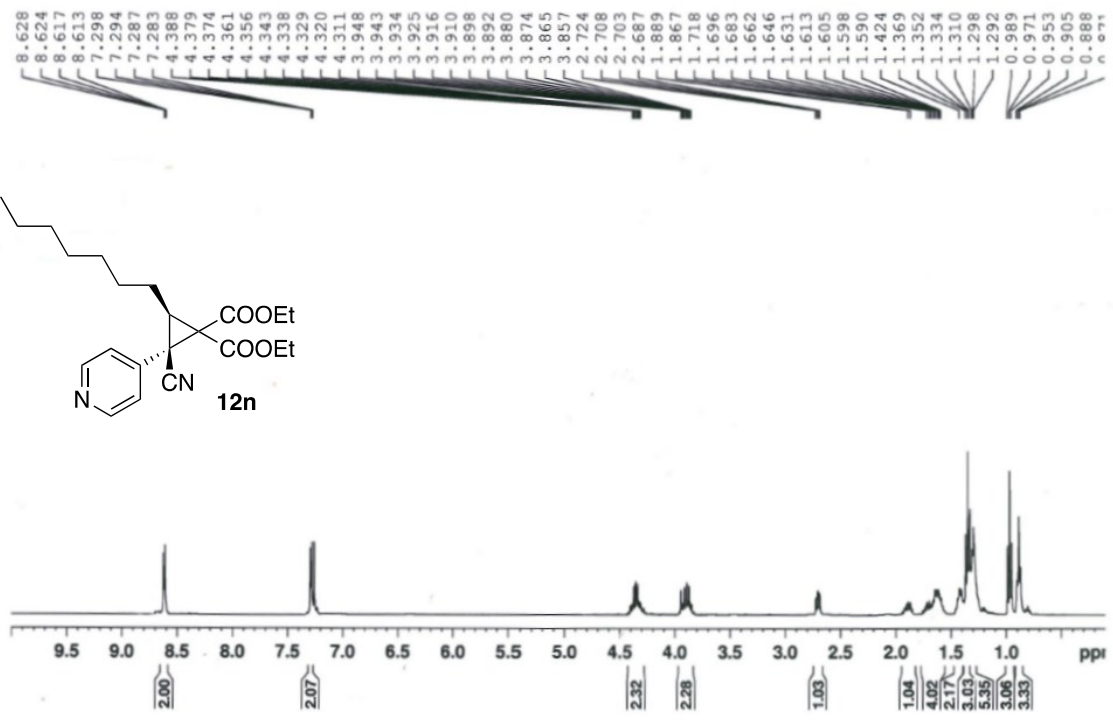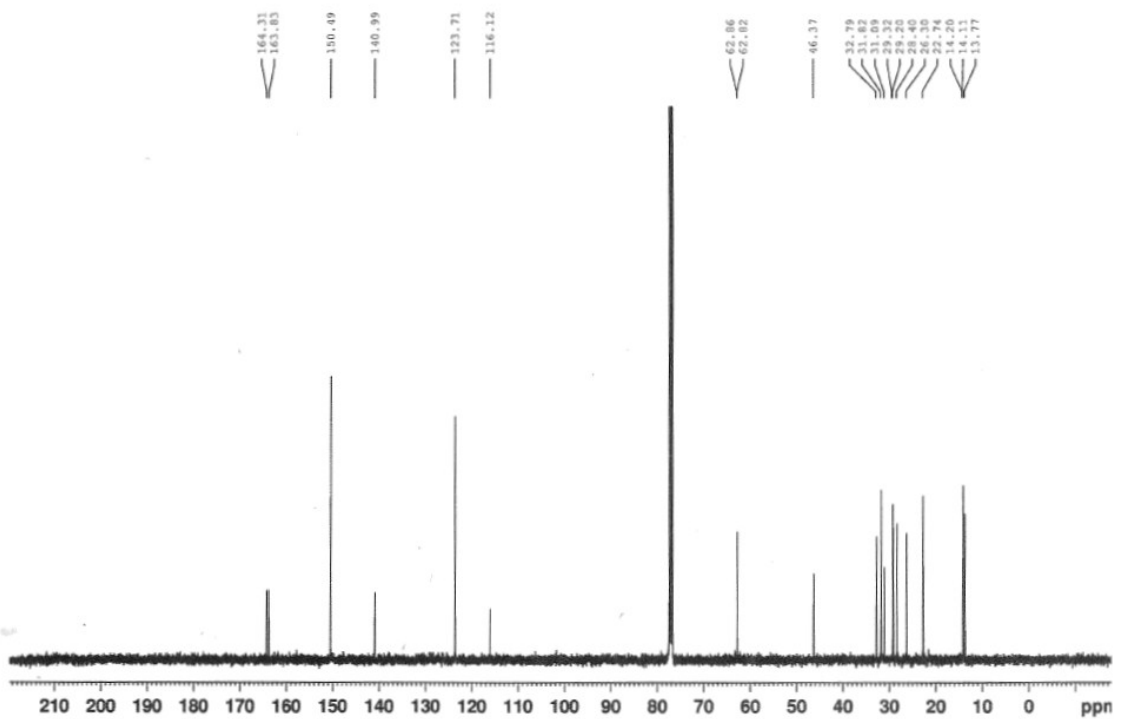



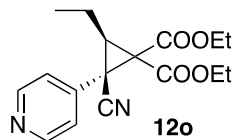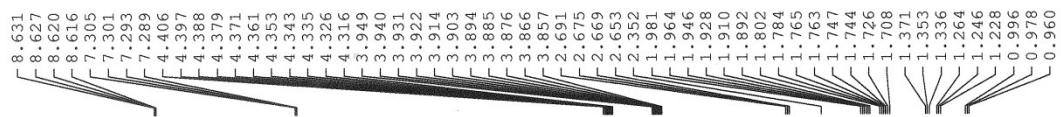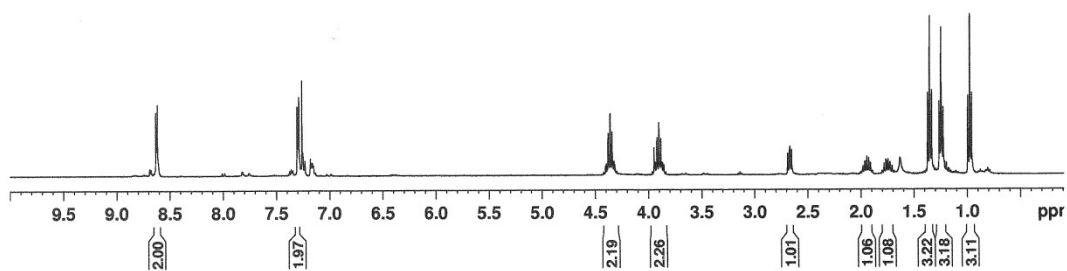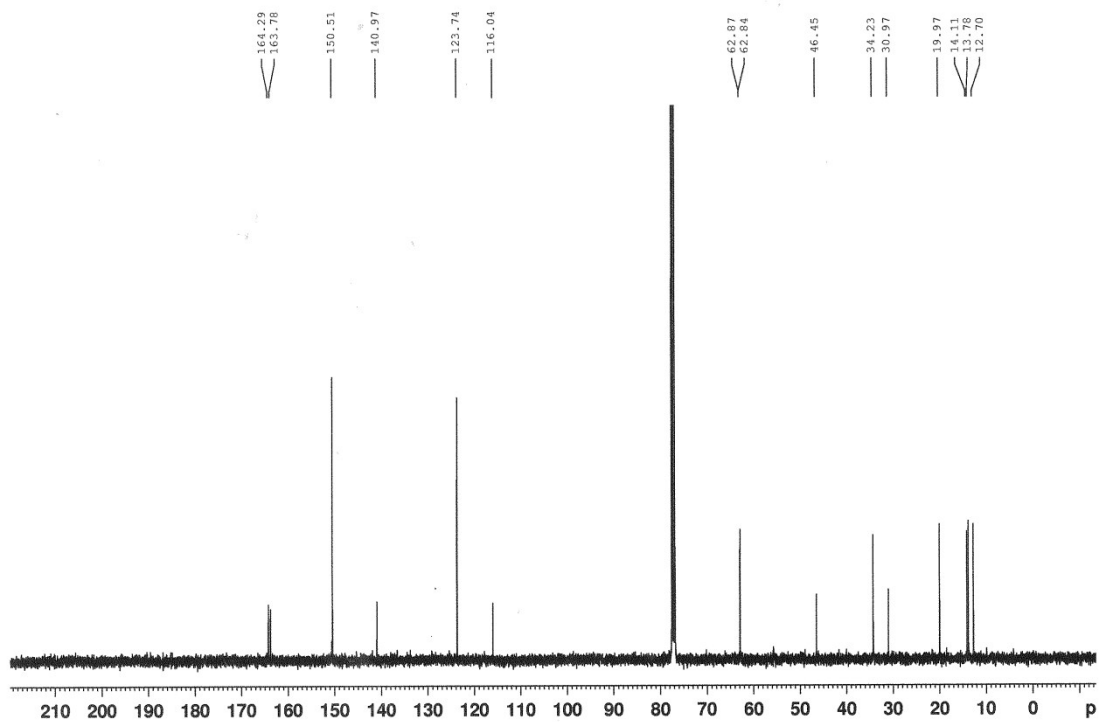

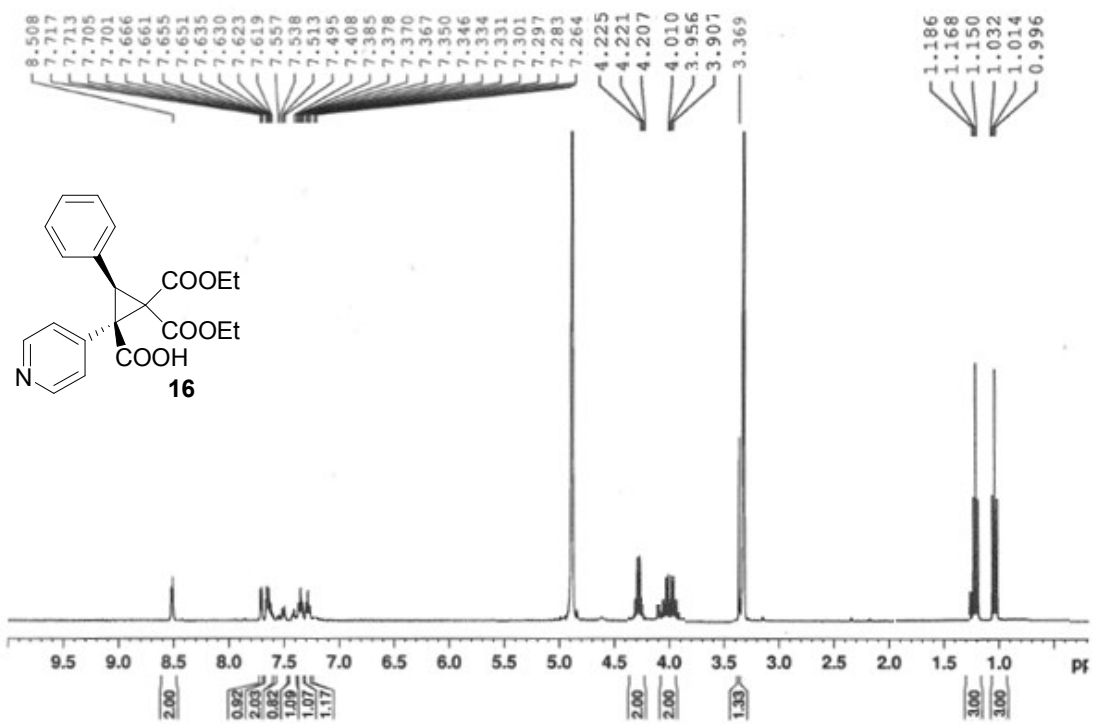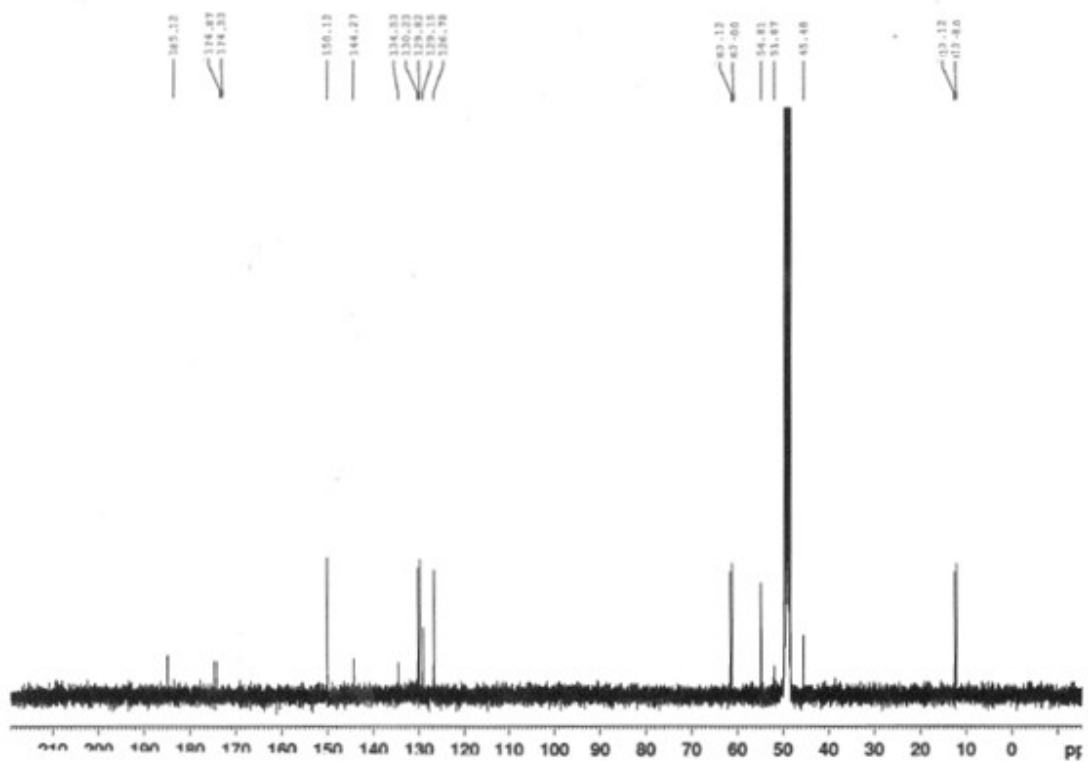

# Compound 12a

## DEFAULT REPORT

| Peak # | Component Name | Time [min] | Area [uV*sec] | Height [uV] | Area [%] | Norm. Area [%] | Cal. Range | Volt Range | BL  | Raw Amount | Adjusted Amount |
|--------|----------------|------------|---------------|-------------|----------|----------------|------------|------------|-----|------------|-----------------|
| 1      |                | 29.590     | 6658711.60    | 55616.78    | 90.89    | 90.89          |            |            | *MM | 6.6587     | 6.6587          |
| 2      |                | 36.036     | 667627.28     | 7277.34     | 9.11     | 9.11           |            |            | *MM | 0.6676     | 0.6676          |
|        |                |            | 7326338.88    | 62894.12    | 100.00   | 100.00         |            |            |     | 7.3263     | 7.3263          |

Missing Component Report  
Component Expected Retention (Calibration File)

All components were found

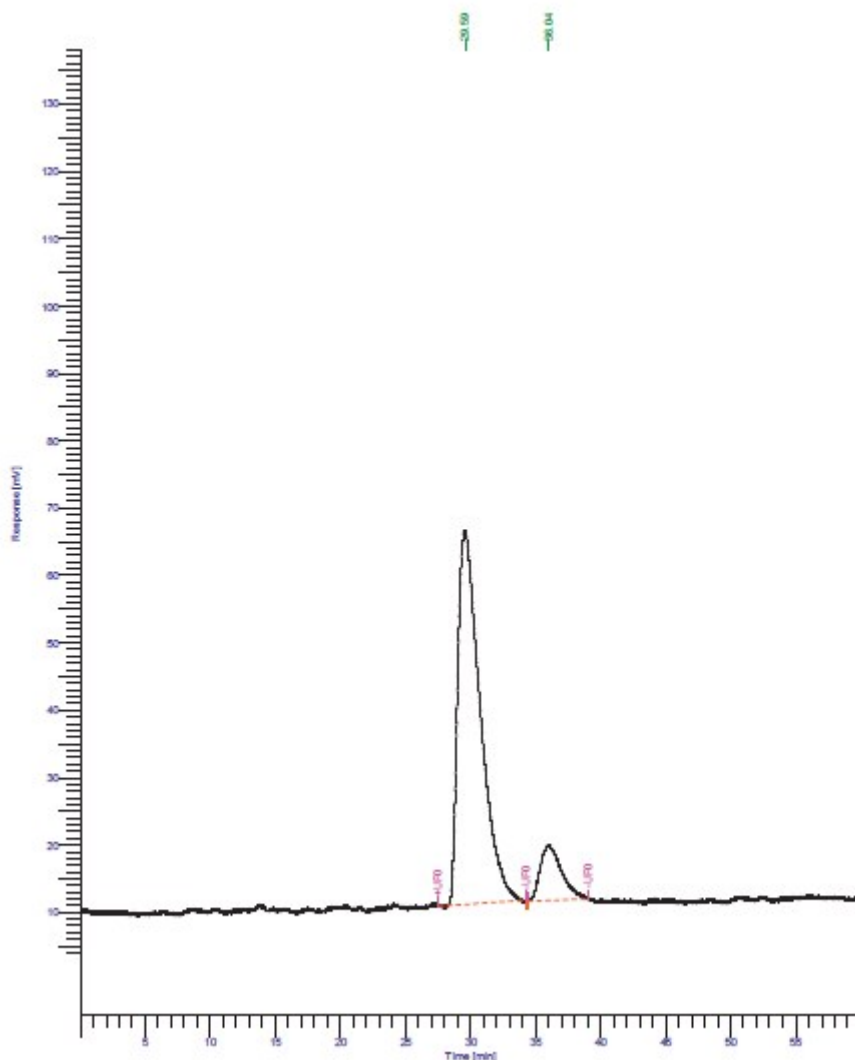

# DEFAULT REPORT

| Peak # | Component Name | Time [min] | Area [uV*sec] | Height [uV] | Area [%] | Norm. Area [%] | Cal. Range | Volt Range | BL  | Raw Amount | Adjusted Amount |
|--------|----------------|------------|---------------|-------------|----------|----------------|------------|------------|-----|------------|-----------------|
| 1      |                | 29.641     | 17103345.39   | 152855.60   | 50.62    | 50.62          |            |            | *MM | 17.1033    | 17.1033         |
| 2      |                | 35.046     | 16686611.01   | 126044.75   | 49.38    | 49.38          |            |            | *MM | 16.6866    | 16.6866         |
|        |                |            | 33789956.40   | 278900.35   | 100.00   | 100.00         |            |            |     | 33.7900    | 33.7900         |

Missing Component Report  
Component Expected Retention (Calibration File)

All components were found

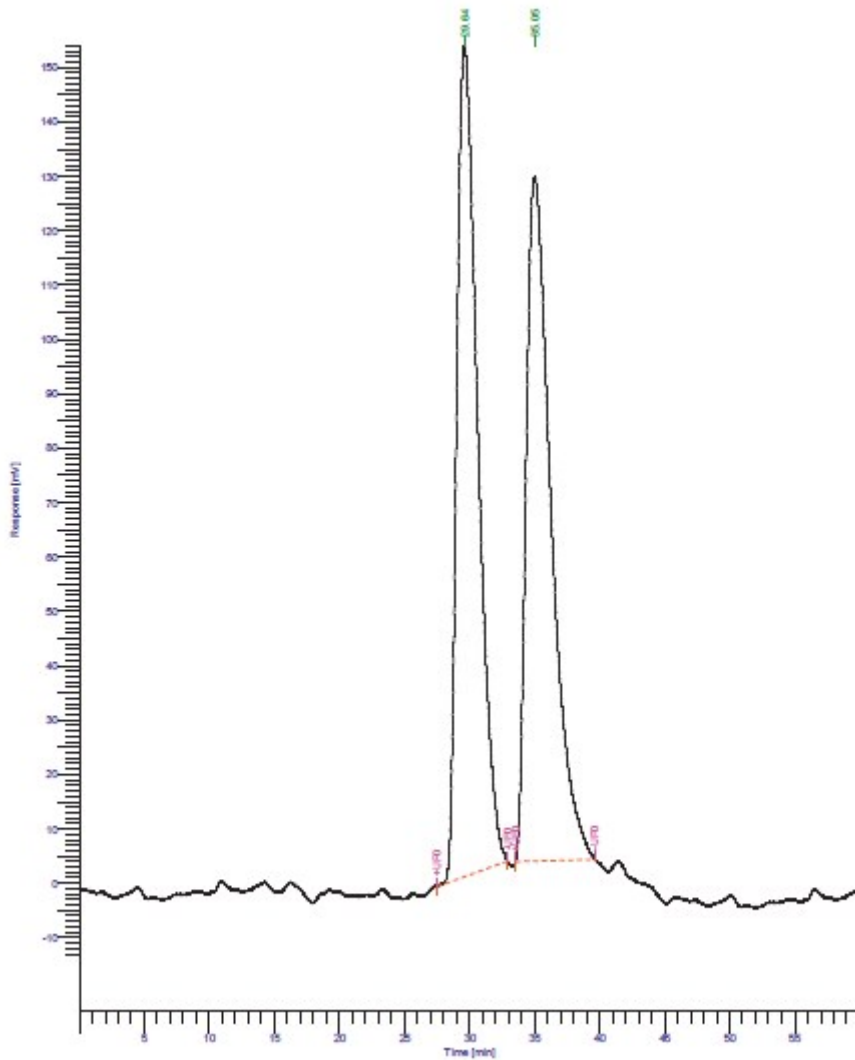

# Compound 12b

## DEFAULT REPORT

| Peak # | Component Name | Time [min] | Area [uV*sec] | Height [uV] | Area [%] | Norm. Area [%] | Cal. Range | Volt Range | BL  | Raw Amount | Adjusted Amount |
|--------|----------------|------------|---------------|-------------|----------|----------------|------------|------------|-----|------------|-----------------|
| 1      |                | 32.663     | 13956764.61   | 117952.32   | 87.39    | 87.39          |            |            | *MM | 13.9568    | 13.9568         |
| 2      |                | 50.571     | 2013462.91    | 13006.68    | 12.61    | 12.61          |            |            | *MM | 2.0135     | 2.0135          |
|        |                |            | 15970227.52   | 130959.00   | 100.00   | 100.00         |            |            |     | 15.9702    | 15.9702         |

Missing Component Report  
Component Expected Retention (Calibration File)

All components were found

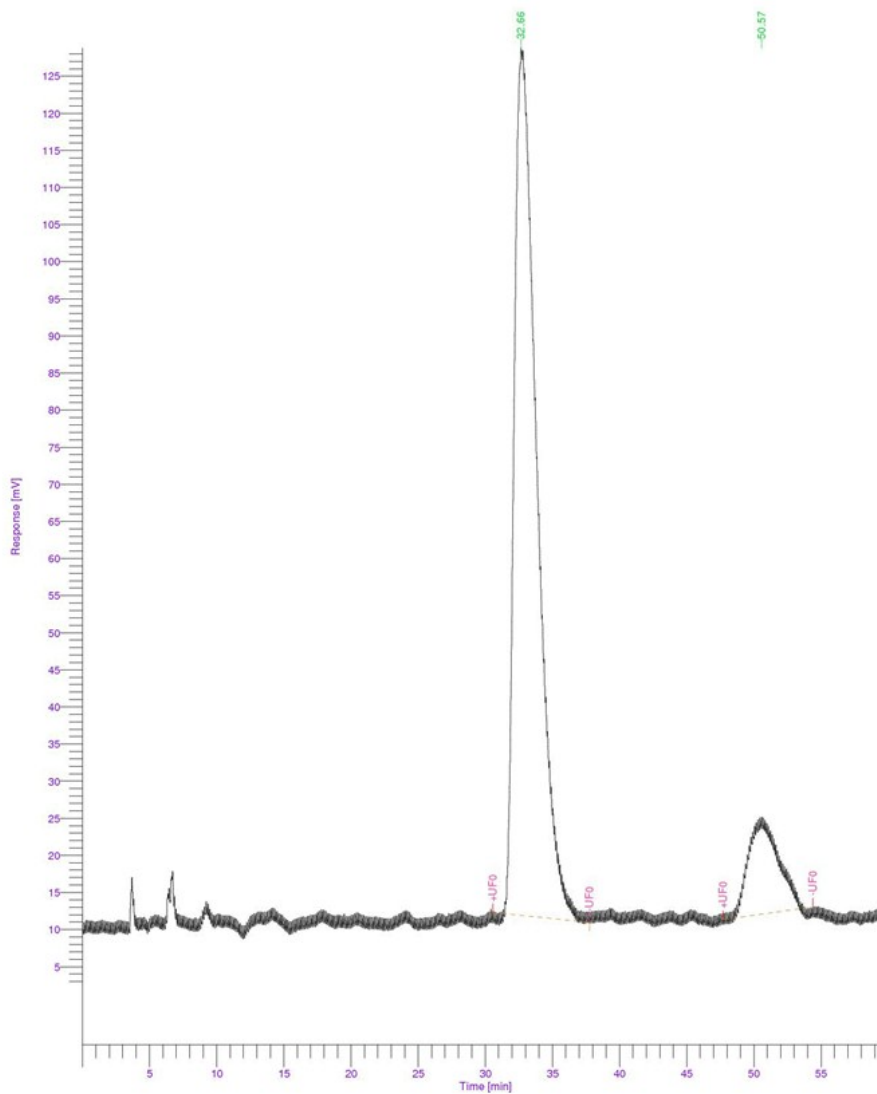

# DEFAULT REPORT

| Peak # | Component Name | Time [min] | Area [uV*sec] | Height [uV] | Area [%] | Norm. Area [%] | Cal. Range | Volt Range | BL  | Raw Amount | Adjusted Amount |
|--------|----------------|------------|---------------|-------------|----------|----------------|------------|------------|-----|------------|-----------------|
| 1      |                | 33.191     | 9632264.83    | 82780.62    | 50.63    | 50.63          |            |            | *MM | 9.6323     | 9.6323          |
| 2      |                | 50.571     | 9391953.78    | 53658.68    | 49.37    | 49.37          |            |            | *MM | 9.3920     | 9.3920          |
|        |                |            | 19024218.61   | 136439.30   | 100.00   | 100.00         |            |            |     | 19.0242    | 19.0242         |

Missing Component Report  
Component Expected Retention (Calibration File)

All components were found

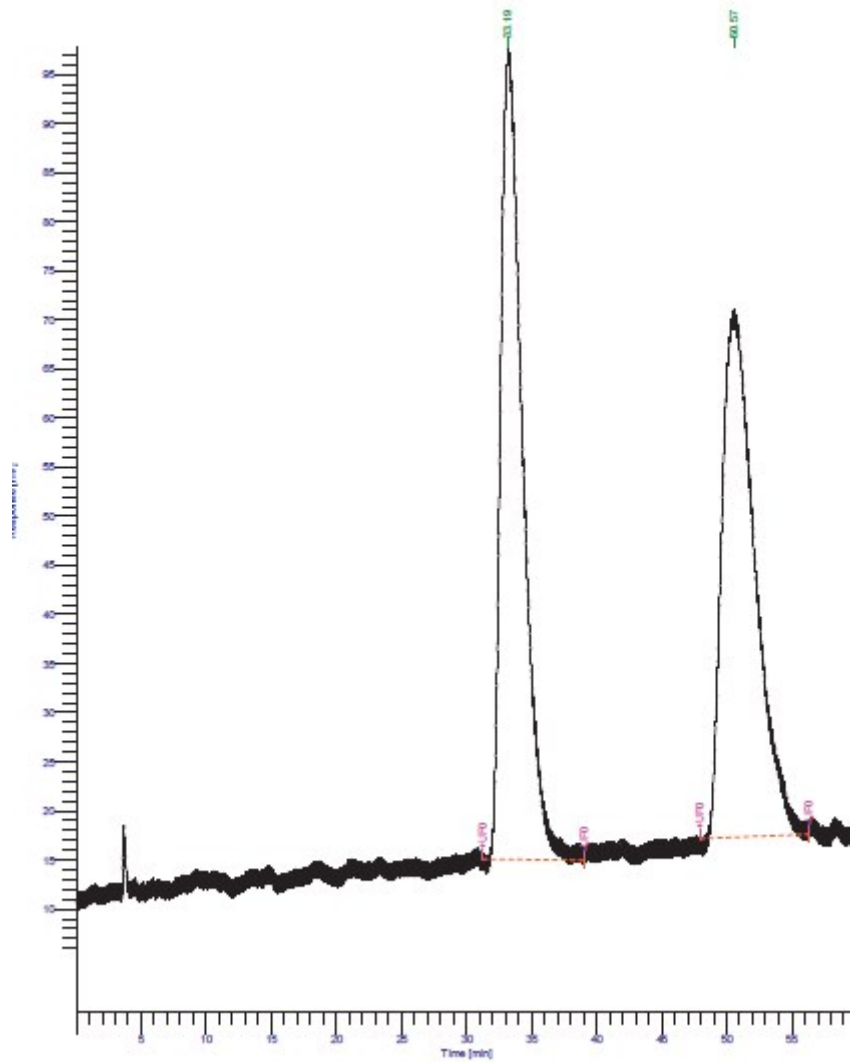

# Compound 12c

## DEFAULT REPORT

| Peak # | Component Name | Time [min] | Area [uV*sec] | Height [uV] | Area [%] | Norm. Area [%] | Cal. Range | Volt Range | BL  | Raw Amount | Adjusted Amount |
|--------|----------------|------------|---------------|-------------|----------|----------------|------------|------------|-----|------------|-----------------|
| 1      |                | 25.593     | 57478230.29   | 569861.78   | 81.59    | 81.59          |            |            | *MM | 57.4782    | 57.4782         |
| 2      |                | 31.255     | 12965404.05   | 120474.21   | 18.41    | 18.41          |            |            | *MM | 12.9654    | 12.9654         |
|        |                |            | 70443634.34   | 690335.99   | 100.00   | 100.00         |            |            |     | 70.4436    | 70.4436         |

Missing Component Report  
Component Expected Retention (Calibration File)

All components were found

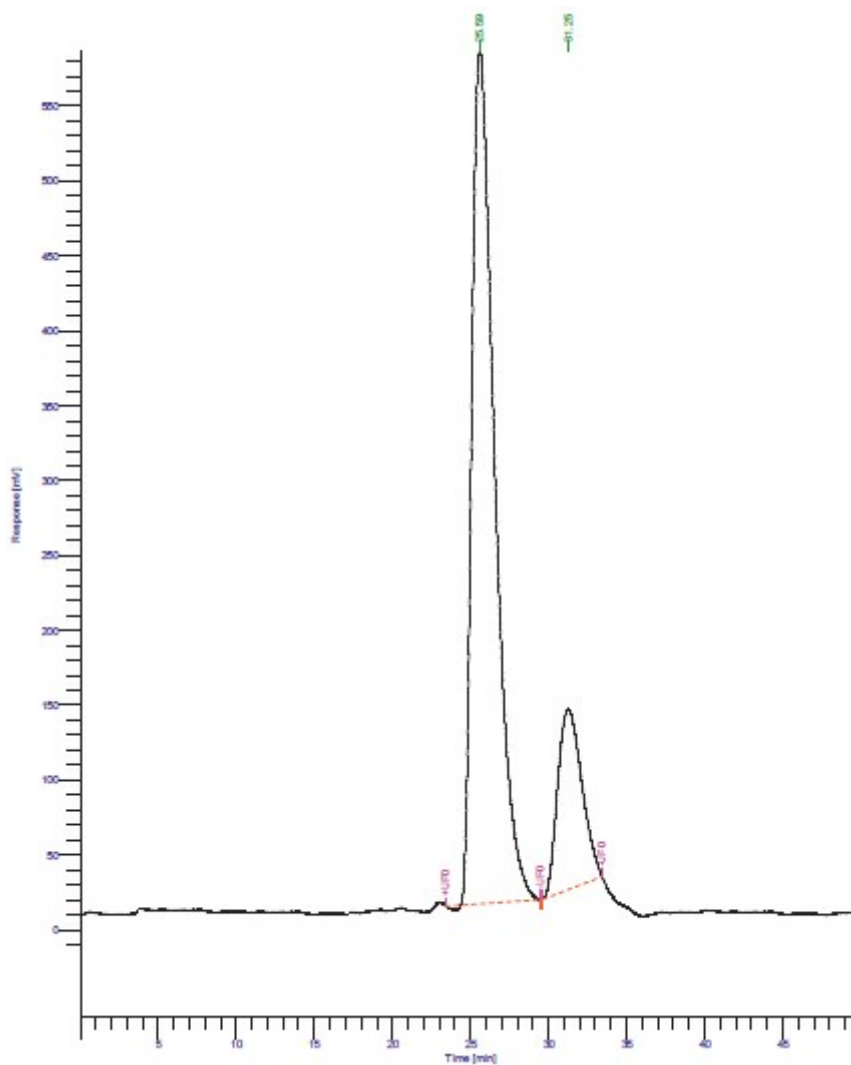

# DEFAULT REPORT

| Peak # | Component Name | Time [min] | Area [uV*sec] | Height [uV] | Area [%] | Norm. Area [%] | Cal. Range | Volt Range | BL  | Raw Amount | Adjusted Amount |
|--------|----------------|------------|---------------|-------------|----------|----------------|------------|------------|-----|------------|-----------------|
| 1      |                | 26.239     | 21714383.49   | 217732.43   | 49.95    | 49.95          |            |            | *MM | 21.7144    | 21.7144         |
| 2      |                | 31.511     | 21759818.66   | 167039.66   | 50.05    | 50.05          |            |            | *MM | 21.7598    | 21.7598         |
|        |                |            | 43474202.15   | 384772.09   | 100.00   | 100.00         |            |            |     | 43.4742    | 43.4742         |

Missing Component Report  
Component Expected Retention (Calibration File)

All components were found

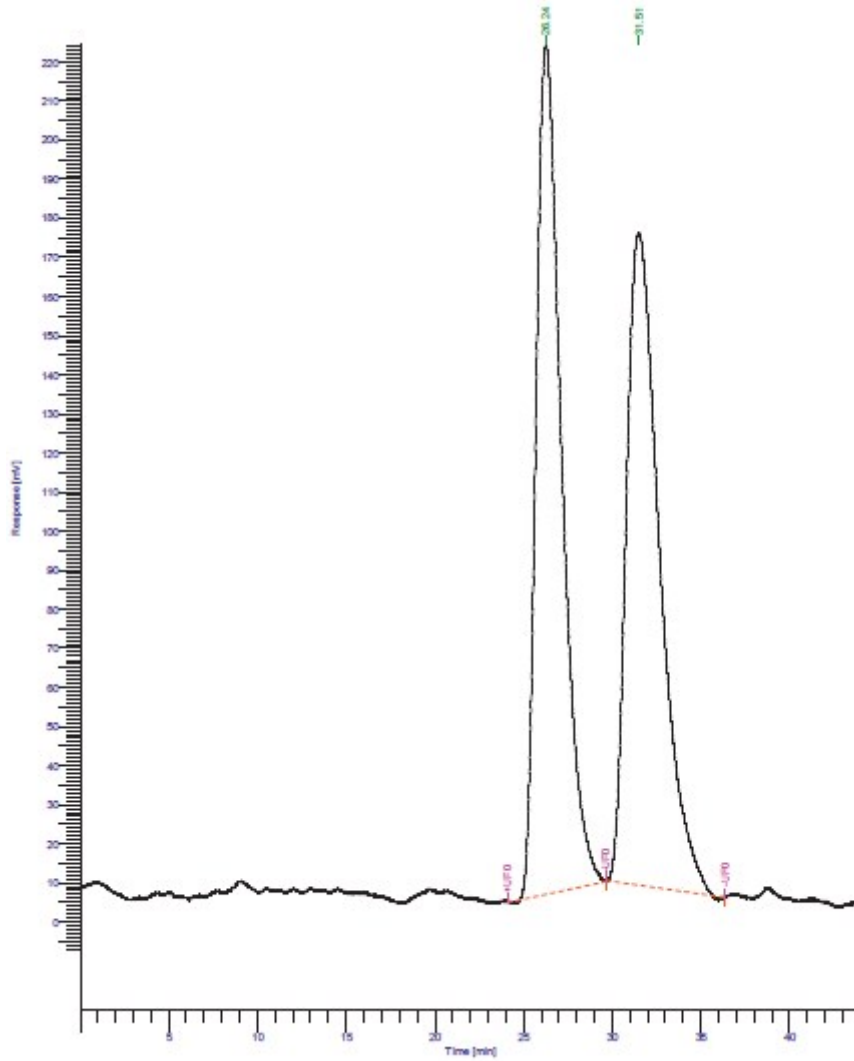



# Compound 12d

## DEFAULT REPORT

| Peak # | Component Name | Time [min] | Area [uV*sec] | Height [uV] | Area [%] | Norm. Area [%] | Cal. Range | Volt Range | BL  | Raw Amount | Adjusted Amount |
|--------|----------------|------------|---------------|-------------|----------|----------------|------------|------------|-----|------------|-----------------|
| 1      |                | 30.485     | 57043275.80   | 403527.46   | 87.84    | 87.84          |            |            | *MM | 57.0433    | 57.0433         |
| 2      |                | 38.911     | 7898797.70    | 58523.16    | 12.16    | 12.16          |            |            | *MM | 7.8988     | 7.8988          |
|        |                |            | 64942073.50   | 462050.62   | 100.00   | 100.00         |            |            |     | 64.9421    | 64.9421         |

Missing Component Report  
Component Expected Retention (Calibration File)

All components were found

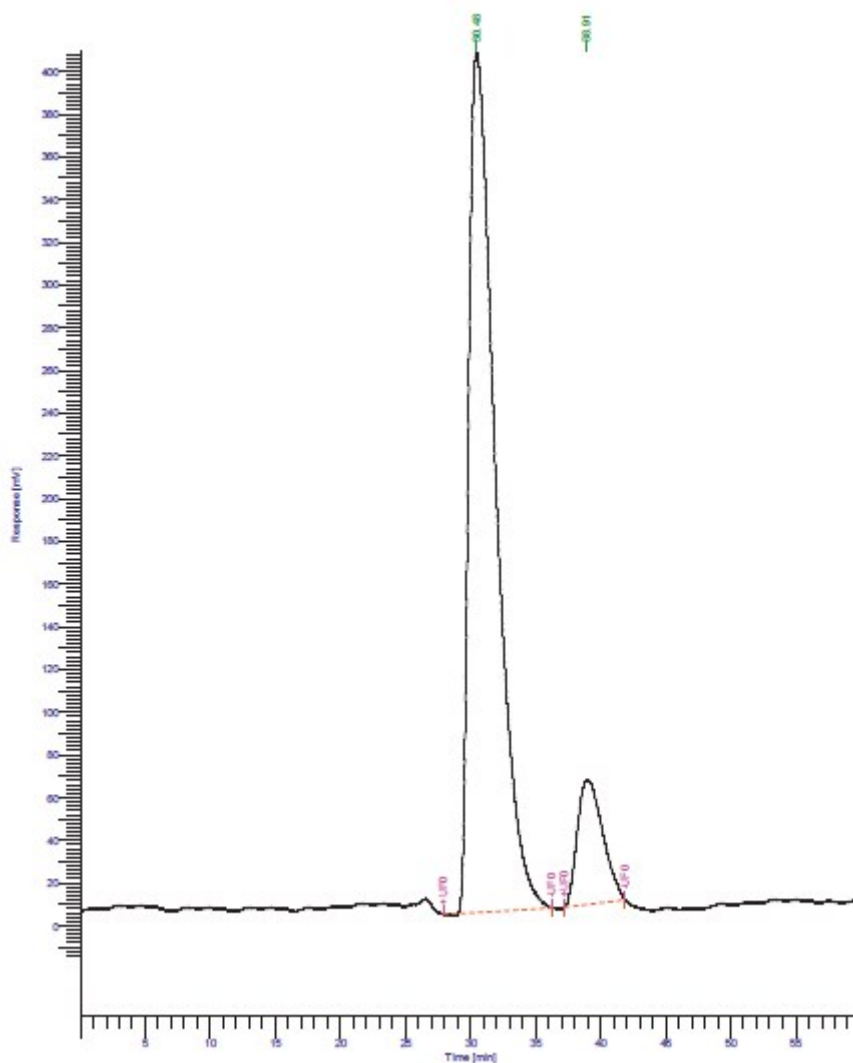

# DEFAULT REPORT

| Peak # | Component Name | Time [min] | Area [uV*sec] | Height [uV] | Area [%] | Norm. Area [%] | Cal. Range | Volt Range | BL  | Raw Amount | Adjusted Amount |
|--------|----------------|------------|---------------|-------------|----------|----------------|------------|------------|-----|------------|-----------------|
| 1      |                | 31.533     | 32802594.52   | 239042.29   | 49.59    | 49.59          |            |            | *MM | 32.8026    | 32.8026         |
| 2      |                | 37.928     | 33346888.49   | 208196.13   | 50.41    | 50.41          |            |            | *MM | 33.3469    | 33.3469         |
|        |                |            | 66149483.02   | 447238.42   | 100.00   | 100.00         |            |            |     | 66.1495    | 66.1495         |

Missing Component Report  
Component Expected Retention (Calibration File)

All components were found

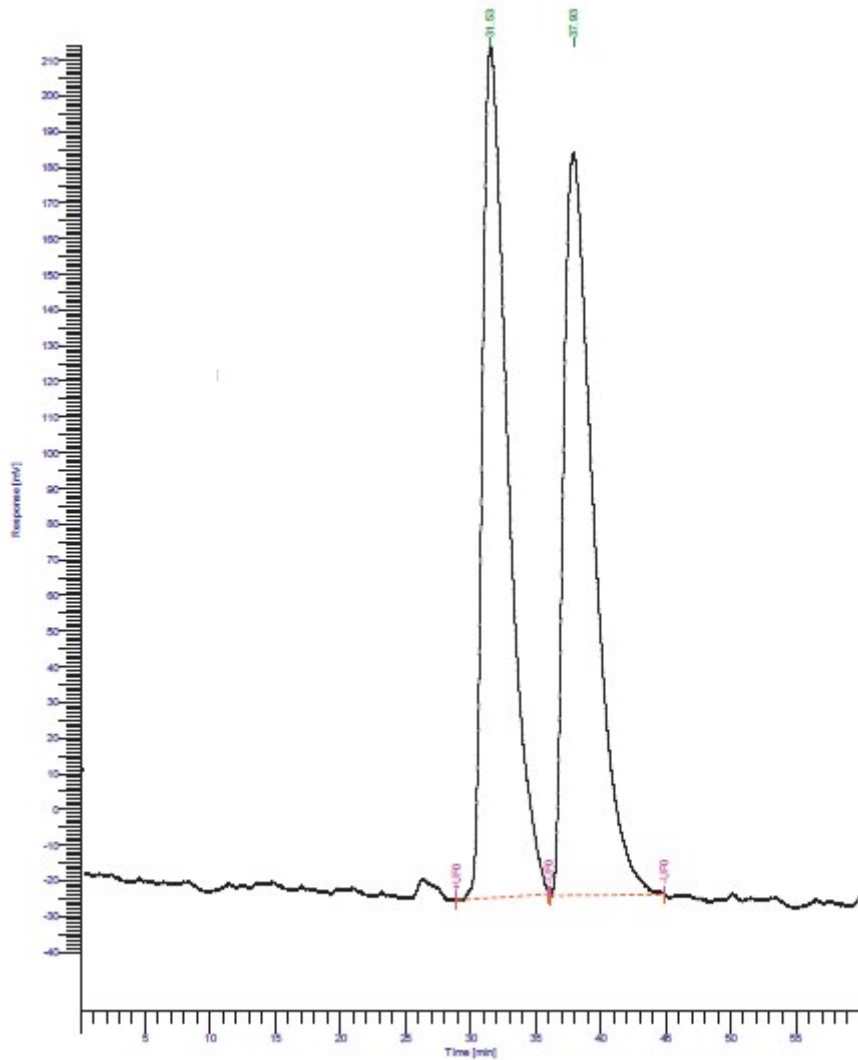

# Compound 12e

## DEFAULT REPORT

| Peak # | Component Name | Time [min] | Area [uV*sec] | Height [uV] | Area [%] | Norm. Area [%] | Cal. Range | Volt Range | BL  | Raw Amount | Adjusted Amount |
|--------|----------------|------------|---------------|-------------|----------|----------------|------------|------------|-----|------------|-----------------|
| 1      |                | 33.704     | 47825175.84   | 293198.75   | 88.47    | 88.47          |            |            | *MM | 47.8252    | 47.8252         |
| 2      |                | 47.263     | 6231561.04    | 35576.34    | 11.53    | 11.53          |            |            | *MM | 6.2316     | 6.2316          |
|        |                |            | 54056736.88   | 328775.09   | 100.00   | 100.00         |            |            |     | 54.0567    | 54.0567         |

Missing Component Report  
Component Expected Retention (Calibration File)

All components were found

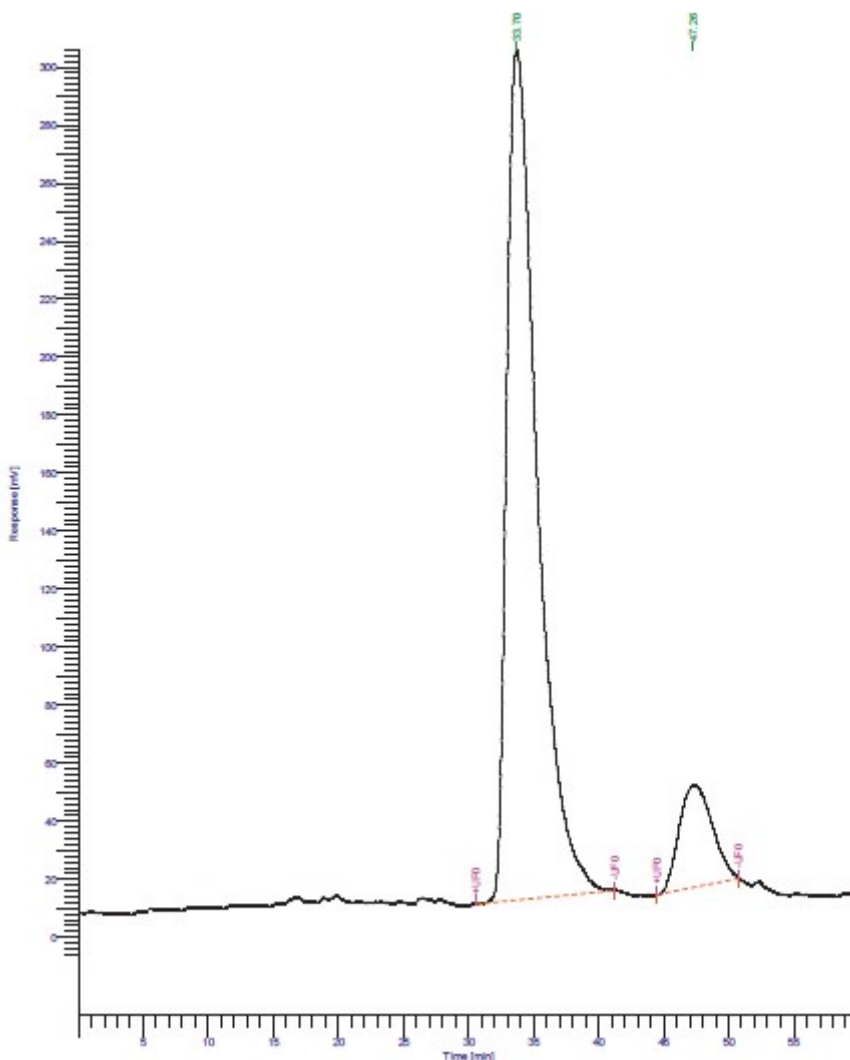

# DEFAULT REPORT

| Peak # | Component Name | Time [min] | Area [uV*sec] | Height [uV] | Area [%] | Norm. Area [%] | Cal. Range | Volt Range | BL  | Raw Amount | Adjusted Amount |
|--------|----------------|------------|---------------|-------------|----------|----------------|------------|------------|-----|------------|-----------------|
| 1      |                | 34.899     | 33864006.91   | 199778.99   | 50.08    | 50.08          |            |            | *MM | 33.8640    | 33.8640         |
| 2      |                | 47.667     | 33755004.42   | 152240.85   | 49.92    | 49.92          |            |            | *MM | 33.7550    | 33.7550         |
|        |                |            | 67619011.33   | 352019.84   | 100.00   | 100.00         |            |            |     | 67.6190    | 67.6190         |

Missing Component Report  
Component Expected Retention (Calibration File)

All components were found

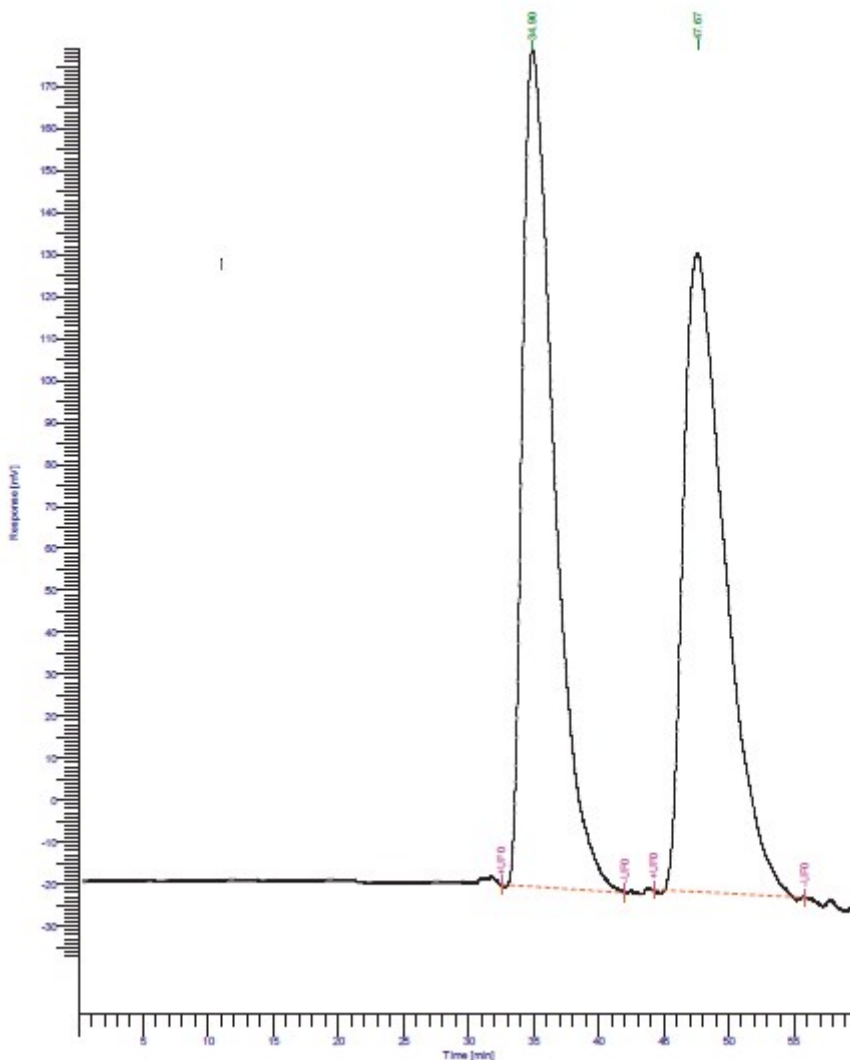

# Compound 12f

## DEFAULT REPORT

| Peak # | Component Name | Time [min] | Area [uV*sec] | Height [uV] | Area [%] | Norm. Area [%] | Cal. Range | Volt Range | BL  | Raw Amount | Adjusted Amount |
|--------|----------------|------------|---------------|-------------|----------|----------------|------------|------------|-----|------------|-----------------|
| 1      |                | 34.613     | 37103064.69   | 325522.29   | 88.80    | 88.80          |            |            | *MM | 37.1031    | 37.1031         |
| 2      |                | 43.831     | 4677467.07    | 39760.95    | 11.20    | 11.20          |            |            | *MM | 4.6775     | 4.6775          |
|        |                |            | 41780531.77   | 365283.24   | 100.00   | 100.00         |            |            |     | 41.7805    | 41.7805         |

Missing Component Report  
Component Expected Retention (Calibration File)

All components were found

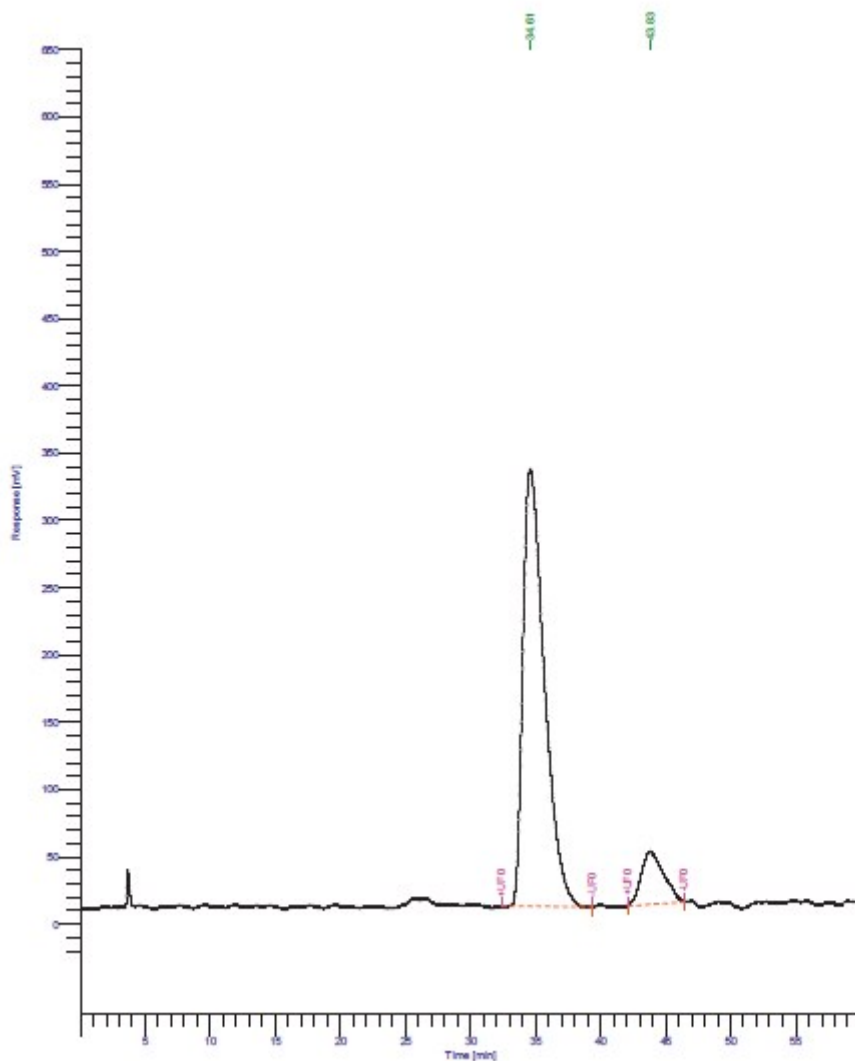

# DEFAULT REPORT

| Peak # | Component Name | Time [min] | Area [uV*sec] | Height [uV] | Area [%] | Norm. Area [%] | Cal. Range | Volt Range | BL  | Raw Amount | Adjusted Amount |
|--------|----------------|------------|---------------|-------------|----------|----------------|------------|------------|-----|------------|-----------------|
| 1      |                | 35.207     | 26563135.61   | 226695.04   | 50.36    | 50.36          |            |            | *MM | 26.5631    | 26.5631         |
| 2      |                | 43.927     | 26179152.07   | 188835.90   | 49.64    | 49.64          |            |            | *MM | 26.1792    | 26.1792         |
|        |                |            | 52742287.68   | 415530.95   | 100.00   | 100.00         |            |            |     | 52.7423    | 52.7423         |

Missing Component Report  
Component Expected Retention (Calibration File)

All components were found

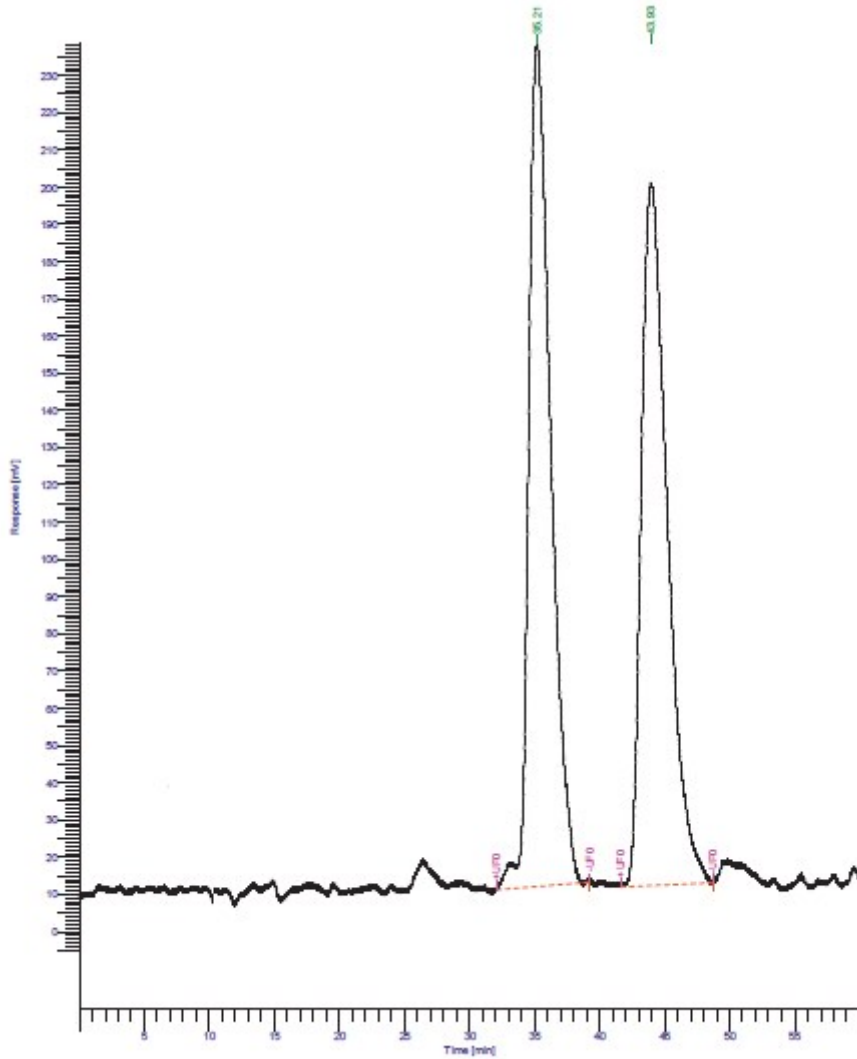

# Compound 12g

## DEFAULT REPORT

| Peak # | Component Name | Time [min] | Area [uV*sec] | Height [uV] | Area [%] | Norm. Area [%] | Cal. Range | Volt Range | BL  | Raw Amount | Adjusted Amount |
|--------|----------------|------------|---------------|-------------|----------|----------------|------------|------------|-----|------------|-----------------|
| 1      |                | 25.674     | 4448985.24    | 50324.09    | 11.12    | 11.12          |            |            | *MM | 4.4490     | 4.4490          |
| 2      |                | 36.989     | 35562382.71   | 139722.87   | 88.88    | 88.88          |            |            | *MM | 35.5624    | 35.5624         |
|        |                |            | 40011367.95   | 190046.96   | 100.00   | 100.00         |            |            |     | 40.0114    | 40.0114         |

Missing Component Report  
Component Expected Retention (Calibration File)

All components were found

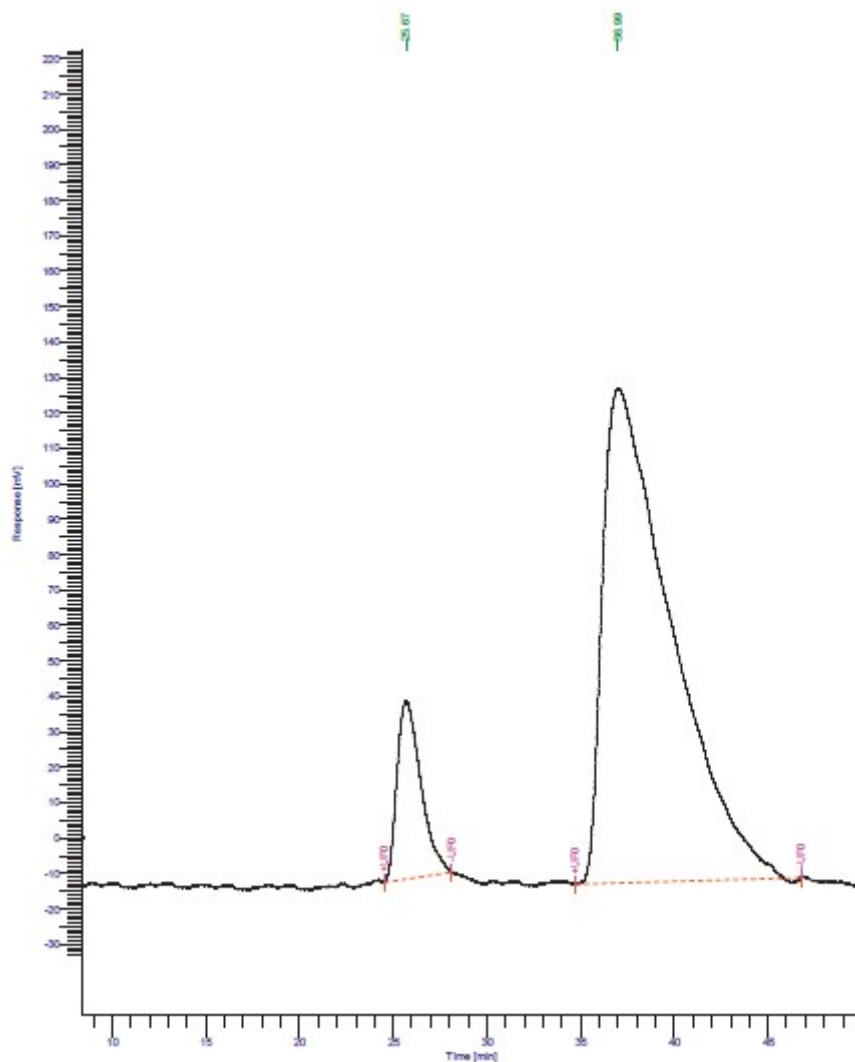

# DEFAULT REPORT

| Peak # | Component Name | Time [min] | Area [uV*sec] | Height [uV] | Area [%] | Norm. Area [%] | Cal. Range | Volt Range | BL  | Raw Amount | Adjusted Amount |
|--------|----------------|------------|---------------|-------------|----------|----------------|------------|------------|-----|------------|-----------------|
| 1      |                | 24.911     | 18370503.68   | 204976.06   | 49.32    | 49.32          |            |            | *MM | 18.3705    | 18.3705         |
| 2      |                | 37.598     | 18877094.71   | 92203.47    | 50.68    | 50.68          |            |            | *MM | 18.8771    | 18.8771         |
|        |                |            | 37247598.39   | 297179.53   | 100.00   | 100.00         |            |            |     | 37.2476    | 37.2476         |

Missing Component Report  
Component Expected Retention (Calibration File)

All components were found

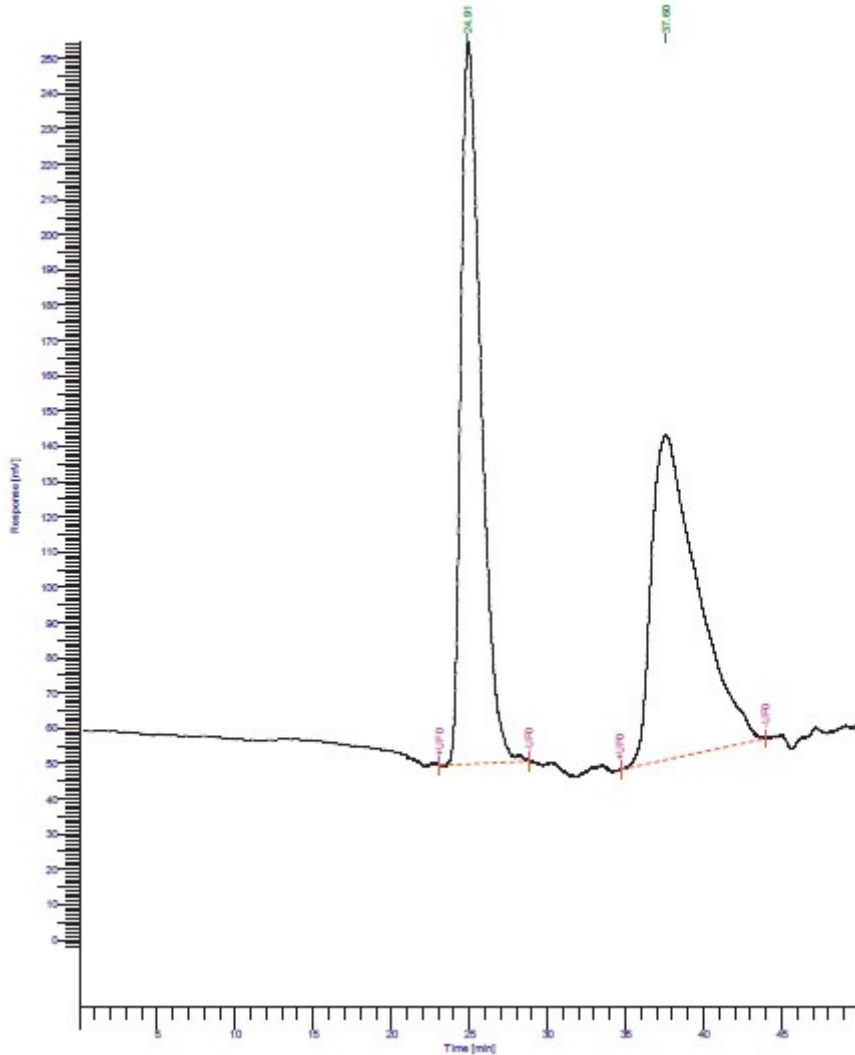



# Compound 12h

## DEFAULT REPORT

| Peak # | Component Name | Time [min] | Area [uV*sec] | Height [uV] | Area [%] | Norm. Area [%] | Cal. Range | Volt Range | BL  | Raw Amount | Adjusted Amount |
|--------|----------------|------------|---------------|-------------|----------|----------------|------------|------------|-----|------------|-----------------|
| 1      |                | 23.203     | 27189471.95   | 297123.05   | 81.83    | 81.83          |            |            | *MM | 27.1895    | 27.1895         |
| 2      |                | 33.337     | 6037084.29    | 52537.60    | 18.17    | 18.17          |            |            | *MM | 6.0371     | 6.0371          |
|        |                |            | 33226556.24   | 349660.65   | 100.00   | 100.00         |            |            |     | 33.2266    | 33.2266         |

Missing Component Report  
Component Expected Retention (Calibration File)

All components were found

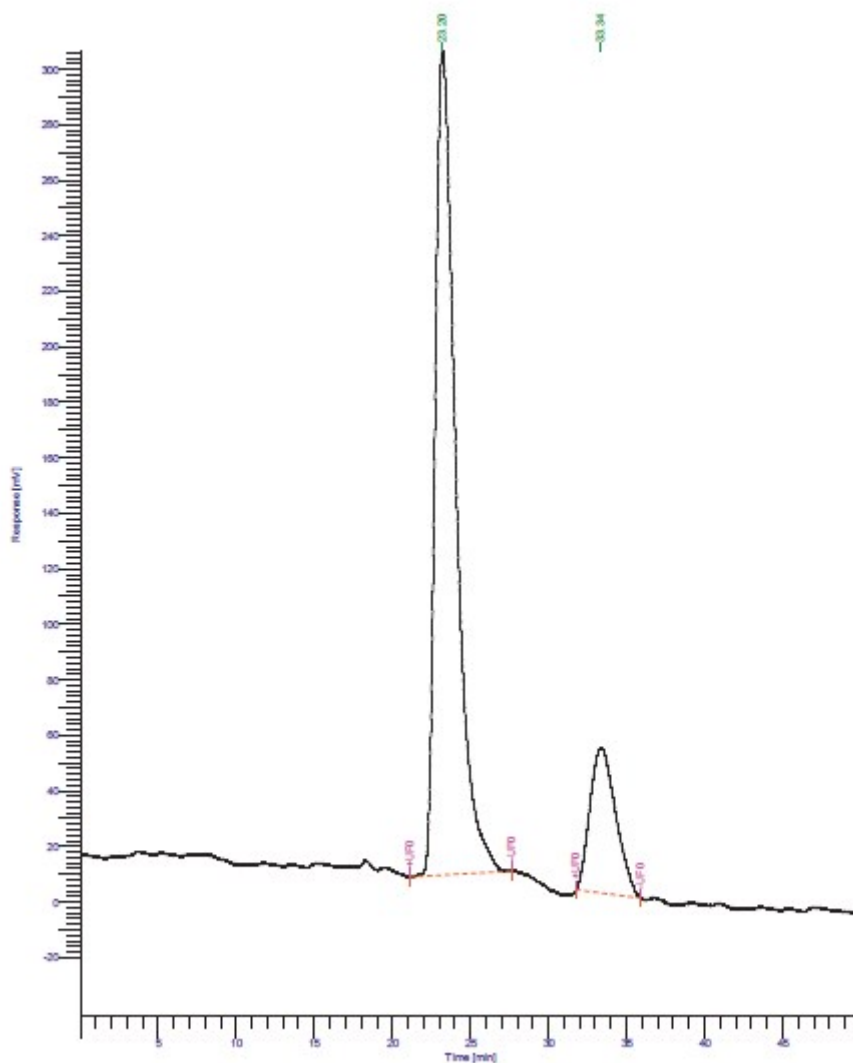

# DEFAULT REPORT

| Peak # | Component Name | Time [min] | Area [uV*sec] | Height [uV] | Area [%] | Norm. Area [%] | Cal. Range | Volt Range | BL  | Raw Amount | Adjusted Amount |
|--------|----------------|------------|---------------|-------------|----------|----------------|------------|------------|-----|------------|-----------------|
| 1      |                | 23.533     | 19635723.09   | 223053.22   | 50.23    | 50.23          |            |            | *MM | 19.6357    | 19.6357         |
| 2      |                | 33.147     | 19456369.47   | 152430.82   | 49.77    | 49.77          |            |            | *MM | 19.4564    | 19.4564         |
|        |                |            | 39092092.56   | 375484.04   | 100.00   | 100.00         |            |            |     | 39.0921    | 39.0921         |

Missing Component Report  
Component Expected Retention (Calibration File)

All components were found

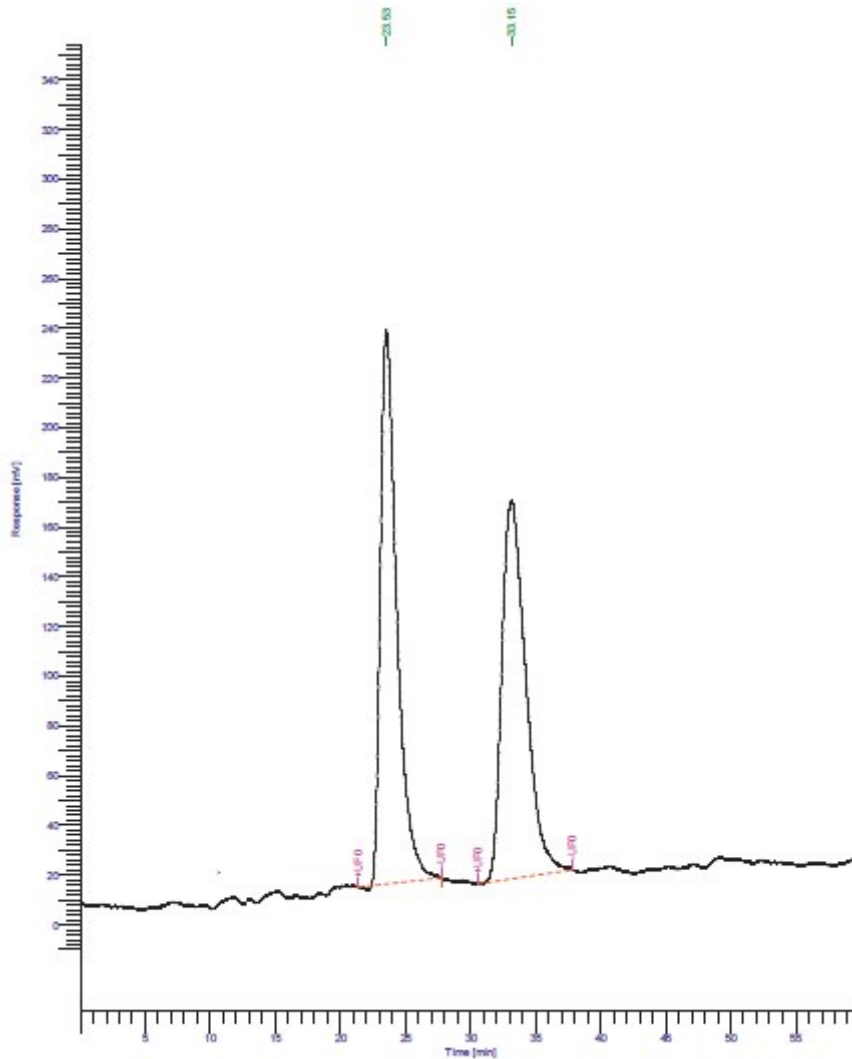

# Compound 12i

## DEFAULT REPORT

| Peak # | Component Name | Time [min] | Area [uV*sec] | Height [uV] | Area [%] | Norm. Area [%] | Cal. Range | Volt Range | BL  | Raw Amount | Adjusted Amount |
|--------|----------------|------------|---------------|-------------|----------|----------------|------------|------------|-----|------------|-----------------|
| 1      |                | 24.985     | 57735652.32   | 582720.26   | 78.47    | 78.47          |            |            | *MM | 57.7357    | 57.7357         |
| 2      |                | 40.399     | 15844162.34   | 103273.21   | 21.53    | 21.53          |            |            | *MM | 15.8442    | 15.8442         |
|        |                |            | 73579814.66   | 685993.47   | 100.00   | 100.00         |            |            |     | 73.5798    | 73.5798         |

Missing Component Report  
Component Expected Retention (Calibration File)

All components were found

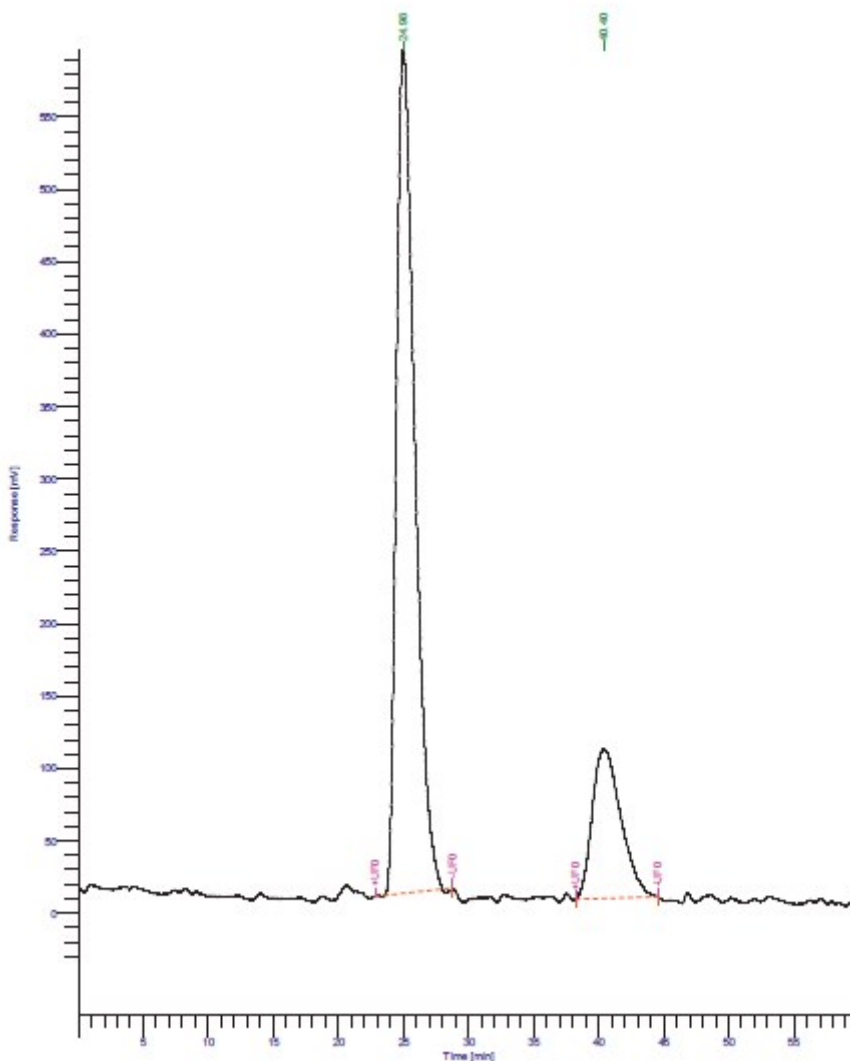

# DEFAULT REPORT

| Peak # | Component Name | Time [min] | Area [uV*sec] | Height [uV] | Area [%] | Norm. Area [%] | Cal. Range | Volt Range | BL  | Raw Amount | Adjusted Amount |
|--------|----------------|------------|---------------|-------------|----------|----------------|------------|------------|-----|------------|-----------------|
| 1      |                | 25.315     | 23737183.13   | 245816.76   | 49.75    | 49.75          |            |            | *MM | 23.7372    | 23.7372         |
| 2      |                | 40.627     | 23973885.17   | 154552.27   | 50.25    | 50.25          |            |            | *MM | 23.9739    | 23.9739         |
|        |                |            | 47711068.30   | 400369.03   | 100.00   | 100.00         |            |            |     | 47.7111    | 47.7111         |

Missing Component Report  
Component Expected Retention (Calibration File)

All components were found

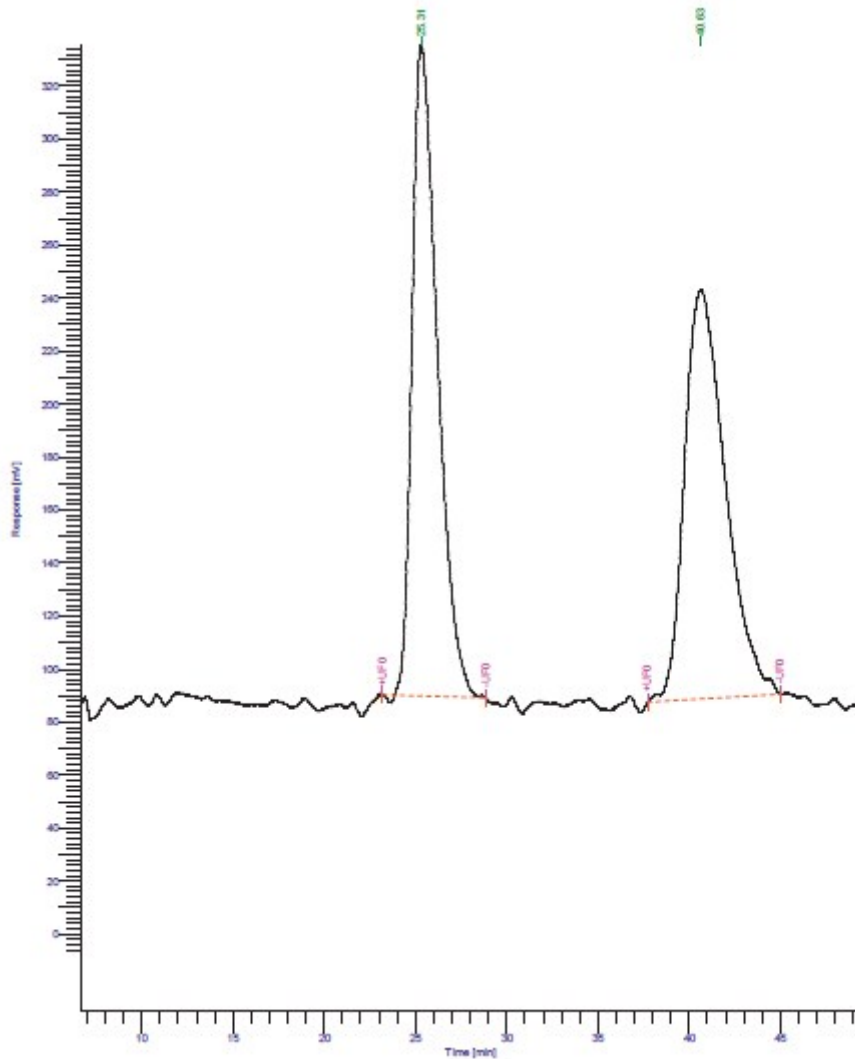

# Compound 12k

## DEFAULT REPORT

| Peak # | Component Name | Time [min] | Area [uV*sec] | Height [uV] | Area [%] | Norm. Area [%] | Cal. Range | Volt Range | BL  | Raw Amount | Adjusted Amount |
|--------|----------------|------------|---------------|-------------|----------|----------------|------------|------------|-----|------------|-----------------|
| 1      |                | 49.229     | 15949776.94   | 86099.11    | 42.05    | 42.05          |            |            | *MM | 15.9498    | 15.9498         |
| 2      |                | 57.530     | 21983489.96   | 100903.09   | 57.95    | 57.95          |            |            | *MM | 21.9835    | 21.9835         |
|        |                |            | 37933266.89   | 187002.21   | 100.00   | 100.00         |            |            |     | 37.9333    | 37.9333         |

### Missing Component Report

Component Expected Retention (Calibration File)

All components were found

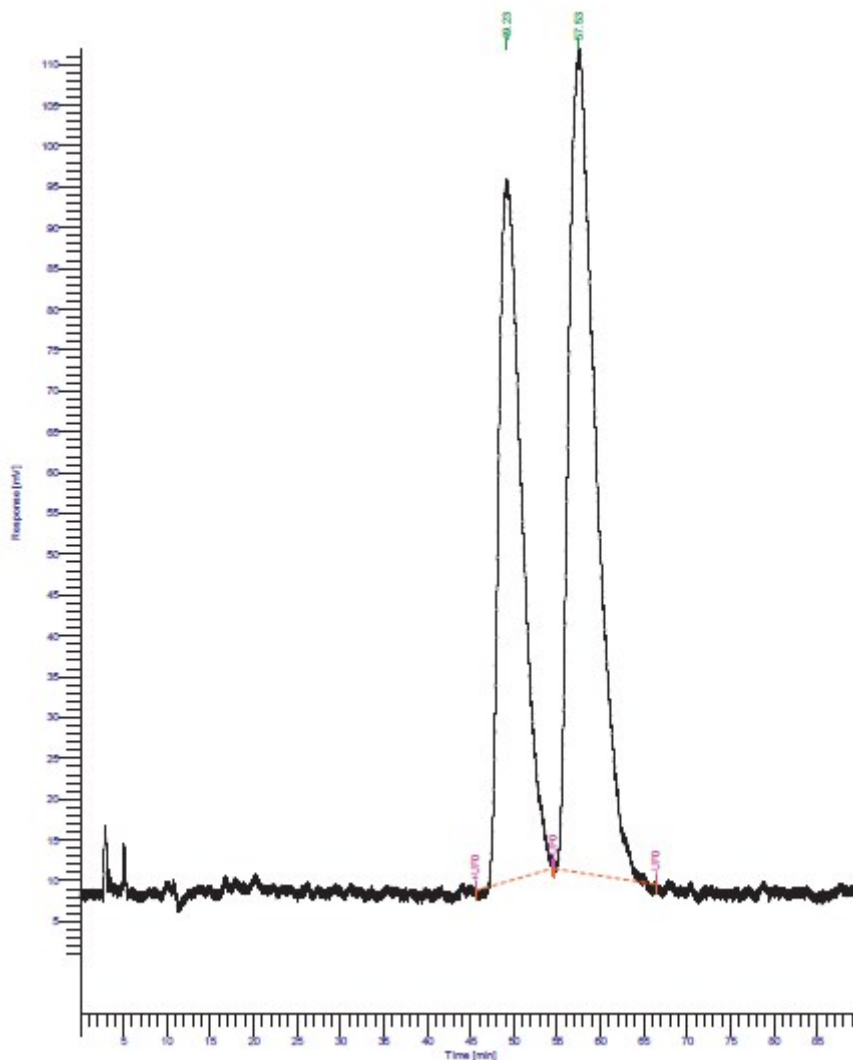

# DEFAULT REPORT

| Peak # | Component Name | Time [min] | Area [uV*sec] | Height [uV] | Area [%] | Norm. Area [%] | Cal. Range | Voit Range | BL  | Raw Amount | Adjusted Amount |
|--------|----------------|------------|---------------|-------------|----------|----------------|------------|------------|-----|------------|-----------------|
| 1      |                | 48.547     | 12429462.41   | 70311.34    | 50.53    | 50.53          |            |            | *MM | 12.4295    | 12.4295         |
| 2      |                | 57.046     | 12168215.36   | 56666.62    | 49.47    | 49.47          |            |            | *MM | 12.1682    | 12.1682         |
|        |                |            | 24597677.77   | 126977.96   | 100.00   | 100.00         |            |            |     | 24.5977    | 24.5977         |

Missing Component Report  
Component Expected Retention (Calibration File)

All components were found

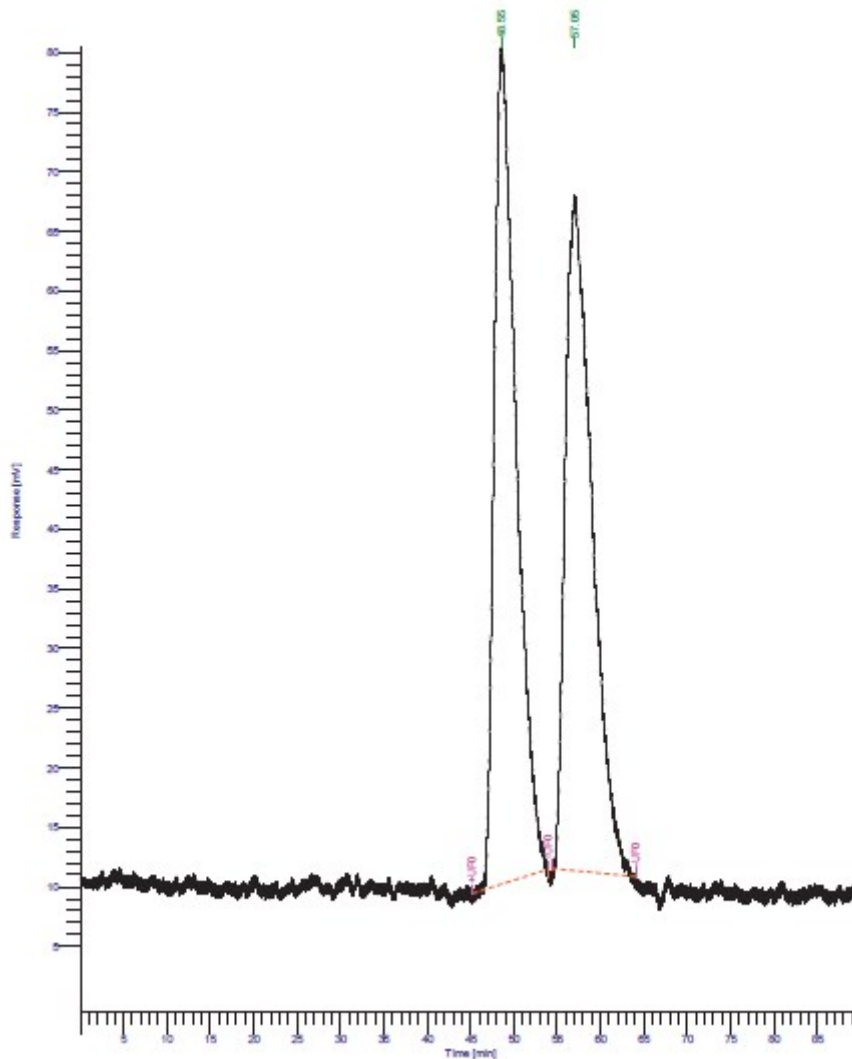

# Compound 121

## DEFAULT REPORT

| Peak # | Component Name | Time [min] | Area [uV*sec] | Height [uV] | Area [%] | Norm. Area [%] | Cal. Range | Volt Range | BL  | Raw Amount | Adjusted Amount |
|--------|----------------|------------|---------------|-------------|----------|----------------|------------|------------|-----|------------|-----------------|
| 1      |                | 21.758     | 32223943.20   | 405645.44   | 75.70    | 75.70          |            |            | *MM | 32.2239    | 32.2239         |
| 2      |                | 29.113     | 10346614.71   | 102926.26   | 24.30    | 24.30          |            |            | *MM | 10.3466    | 10.3466         |
|        |                |            | 42570557.90   | 508571.70   | 100.00   | 100.00         |            |            |     | 42.5706    | 42.5706         |

Missing Component Report  
Component Expected Retention (Calibration File)

All components were found

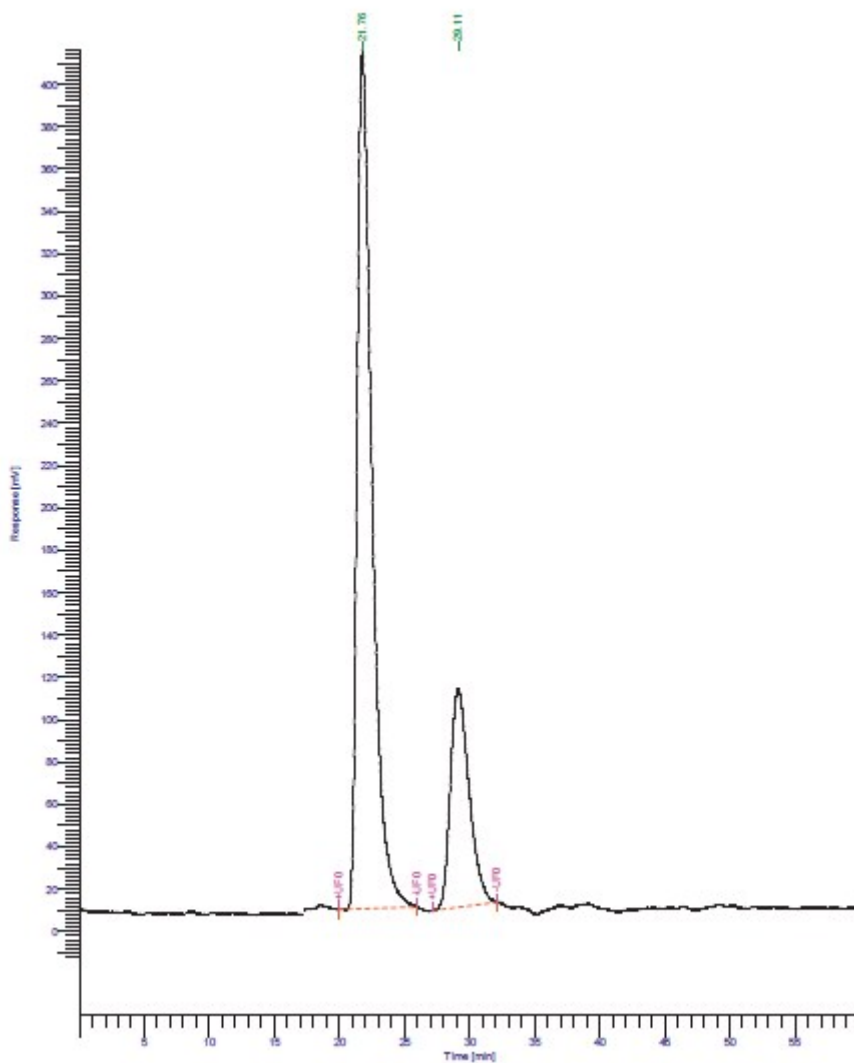

# DEFAULT REPORT

| Peak # | Component Name | Time [min] | Area [uV*sec] | Height [uV] | Area [%] | Norm. Area [%] | Cal. Range | Volt Range | BL  | Raw Amount | Adjusted Amount |
|--------|----------------|------------|---------------|-------------|----------|----------------|------------|------------|-----|------------|-----------------|
| 1      |                | 22.858     | 12787494.65   | 151790.77   | 49.48    | 49.48          |            |            | *MM | 12.7875    | 12.7875         |
| 2      |                | 30.367     | 13057762.31   | 117275.23   | 50.52    | 50.52          |            |            | *MM | 13.0578    | 13.0578         |
|        |                |            | 25845256.97   | 269066.00   | 100.00   | 100.00         |            |            |     | 25.8453    | 25.8453         |

Missing Component Report  
 Component Expected Retention (Calibration File)

All components were found

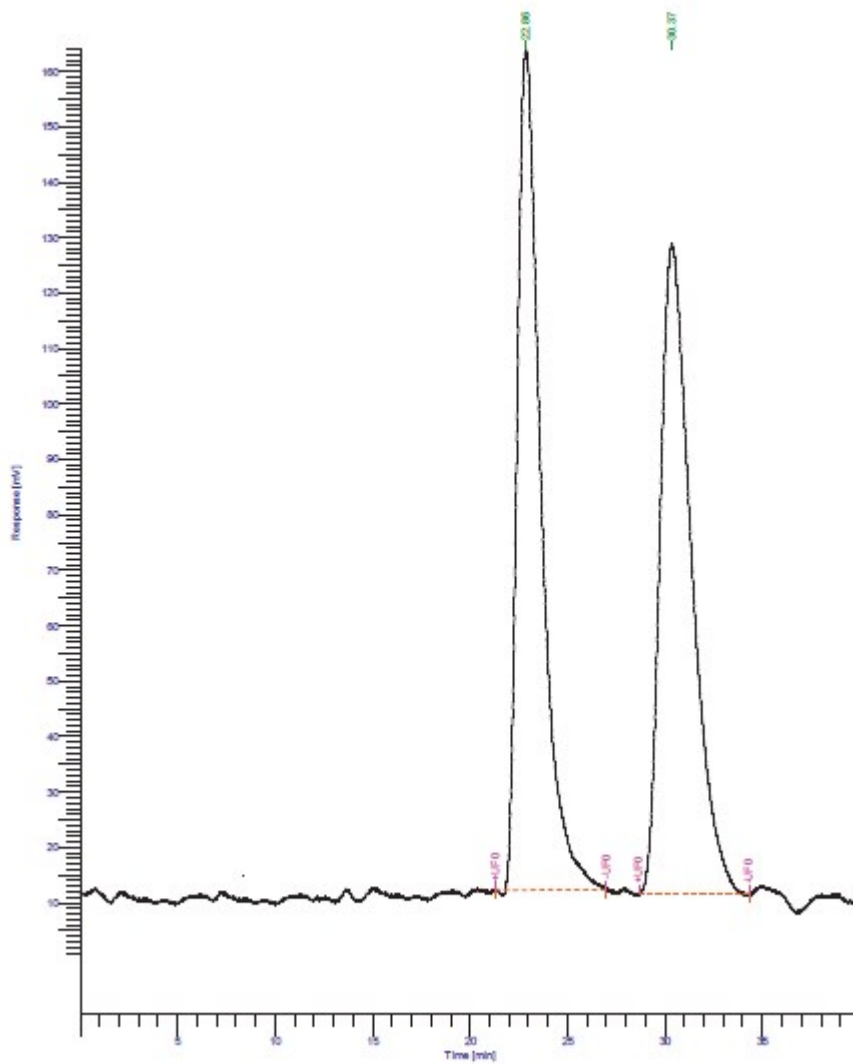



# Compound 12m

## DEFAULT REPORT

| Peak # | Component Name | Time [min] | Area [uV*sec] | Height [uV] | Area [%] | Norm. Area [%] | Cal. Range | Volt Range | BL  | Raw Amount | Adjusted Amount |
|--------|----------------|------------|---------------|-------------|----------|----------------|------------|------------|-----|------------|-----------------|
| 1      |                | 8.793      | 779367.04     | 61732.12    | 9.03     | 9.03           |            |            | *MM | 0.7794     | 0.7794          |
| 2      |                | 9.863      | 7852353.06    | 380237.86   | 90.97    | 90.97          |            |            | *MM | 7.8524     | 7.8524          |
|        |                |            | 8631720.11    | 441969.98   | 100.00   | 100.00         |            |            |     | 8.6317     | 8.6317          |

Missing Component Report  
Component Expected Retention (Calibration File)

All components were found

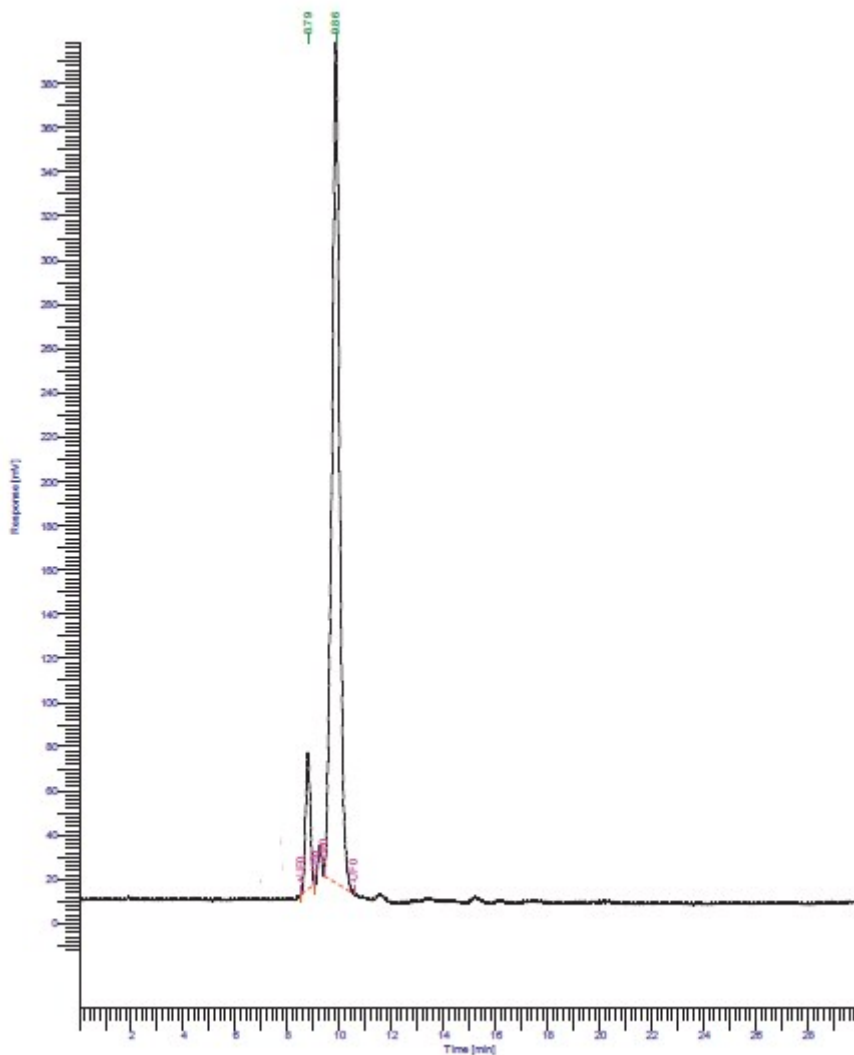

# DEFAULT REPORT

| Peak # | Component Name | Time [min] | Area [uV*sec] | Height [uV] | Area [%] | Norm. Area [%] | Cal. Range | Volt Range | BL  | Raw Amount | Adjusted Amount |
|--------|----------------|------------|---------------|-------------|----------|----------------|------------|------------|-----|------------|-----------------|
| 1      |                | 8.741      | 20650676.04   | 1.22e+06    | 49.48    | 49.48          |            |            | *MM | 20.6507    | 20.6507         |
| 2      |                | 9.922      | 21086575.66   | 1.17e+06    | 50.52    | 50.52          |            |            | *MM | 21.0866    | 21.0866         |
|        |                |            | 41737251.70   | 2.40e+06    | 100.00   | 100.00         |            |            |     | 41.7373    | 41.7373         |

Missing Component Report  
Component Expected Retention (Calibration File)

All components were found

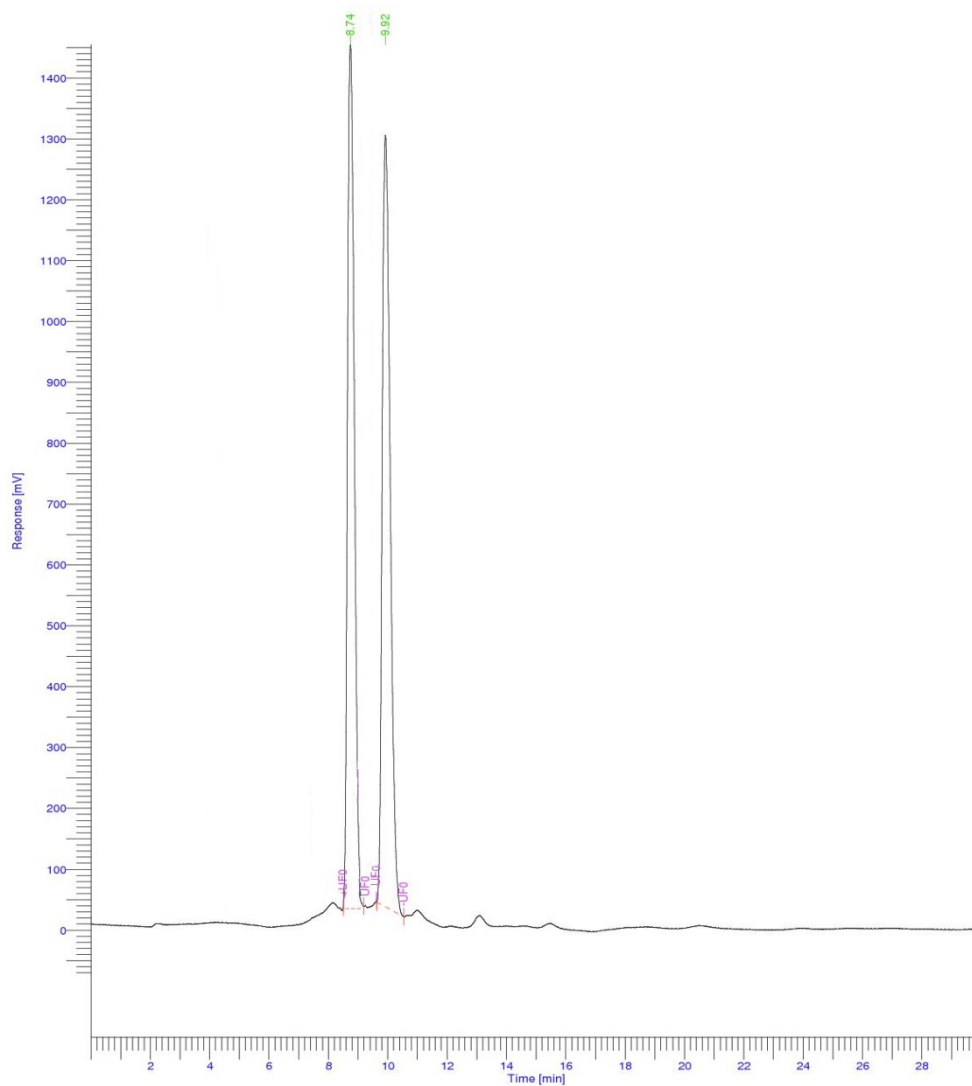

# Compound 12n

## DEFAULT REPORT

| Peak # | Component Name | Time [min] | Area [uV*sec] | Height [uV] | Area [%] | Norm. Area [%] | Cal. Range | Volt Range | BL  | Raw Amount | Adjusted Amount |
|--------|----------------|------------|---------------|-------------|----------|----------------|------------|------------|-----|------------|-----------------|
| 1      |                | 8.353      | 1815200.50    | 141022.64   | 8.55     | 8.55           |            |            | *MM | 1.8152     | 1.8152          |
| 2      |                | 9.643      | 19421651.98   | 854393.49   | 91.45    | 91.45          |            |            | *MM | 19.4217    | 19.4217         |
|        |                |            | 21236852.48   | 995416.13   | 100.00   | 100.00         |            |            |     | 21.2369    | 21.2369         |

Missing Component Report  
Component Expected Retention (Calibration File)

All components were found

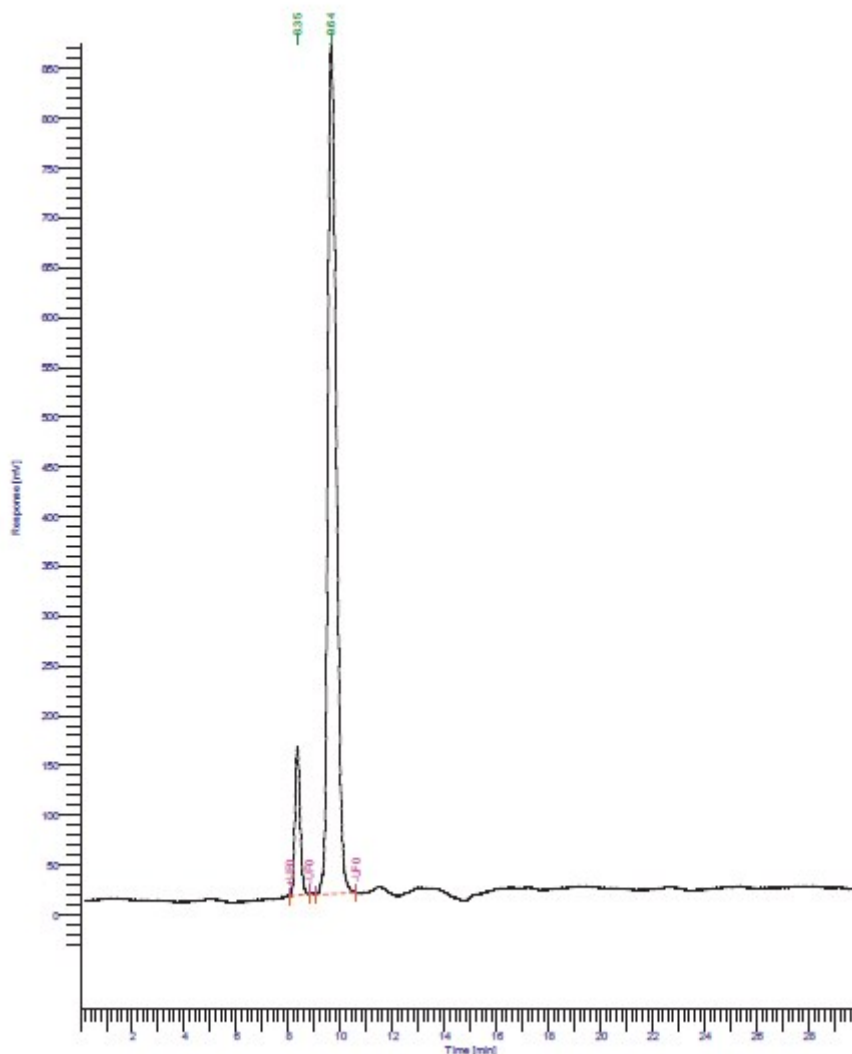

# DEFAULT REPORT

| Peak # | Component Name | Time [min] | Area [uV*sec] | Height [uV] | Area [%] | Norm. Area [%] | Cal. Range | Volt Range | BL  | Raw Amount | Adjusted Amount |
|--------|----------------|------------|---------------|-------------|----------|----------------|------------|------------|-----|------------|-----------------|
| 1      |                | 8.331      | 20650676.04   | 1.22e+06    | 49.48    | 49.48          |            |            | *MM | 20.6507    | 20.6507         |
| 2      |                | 9.563      | 21086575.66   | 1.17e+06    | 50.52    | 50.52          |            |            | *MM | 21.0866    | 21.0866         |
|        |                |            | 41737251.70   | 2.40e+06    | 100.00   | 100.00         |            |            |     | 41.7373    | 41.7373         |

Missing Component Report  
Component Expected Retention (Calibration File)

All components were found

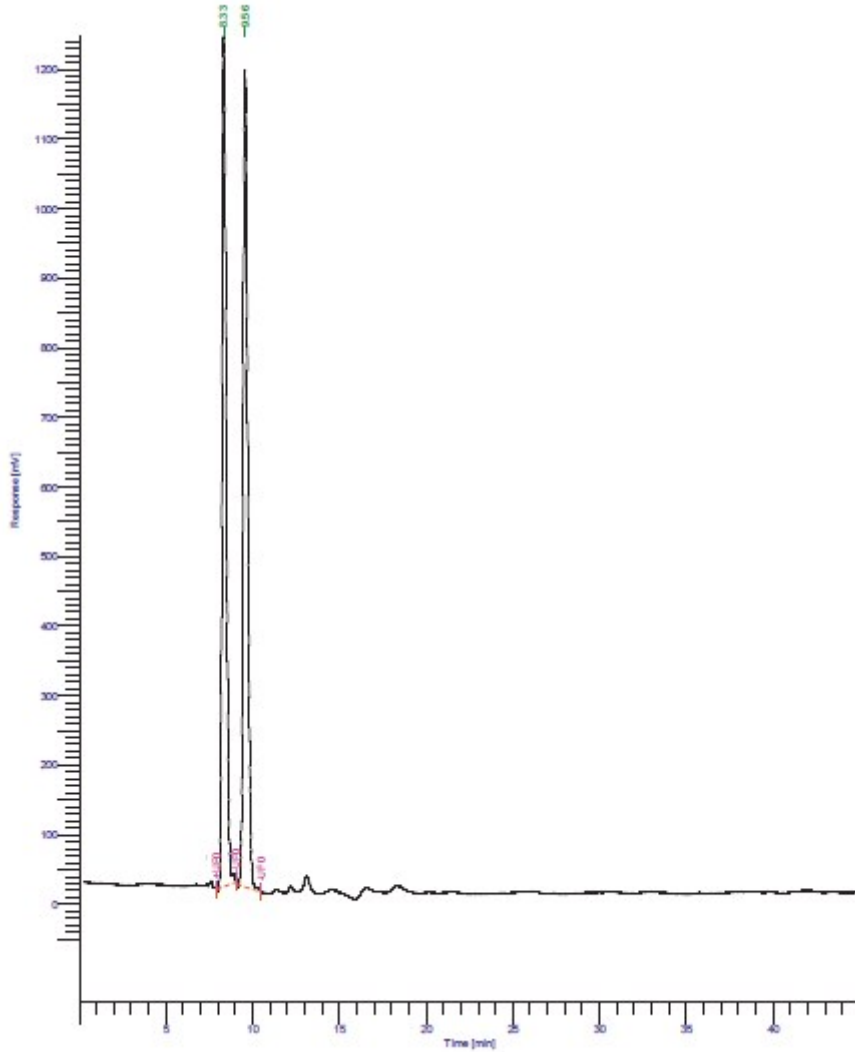

# Compound 12o

## DEFAULT REPORT

| Peak # | Component Name | Time [min] | Area [uV*sec] | Height [uV] | Area [%] | Norm. Area [%] | Cal. Range | Volt Range | BL  | Raw Amount | Adjusted Amount |
|--------|----------------|------------|---------------|-------------|----------|----------------|------------|------------|-----|------------|-----------------|
| 1      |                | 15.026     | 13394492.95   | 586781.42   | 39.51    | 39.51          |            |            | *MM | 13.3945    | 13.3945         |
| 2      |                | 16.016     | 20505366.36   | 914804.91   | 60.49    | 60.49          |            |            | *MM | 20.5054    | 20.5054         |
|        |                |            | 33899859.31   | 1.50e+06    | 100.00   | 100.00         |            |            |     | 33.8999    | 33.8999         |

Missing Component Report  
Component Expected Retention (Calibration File)

All components were found

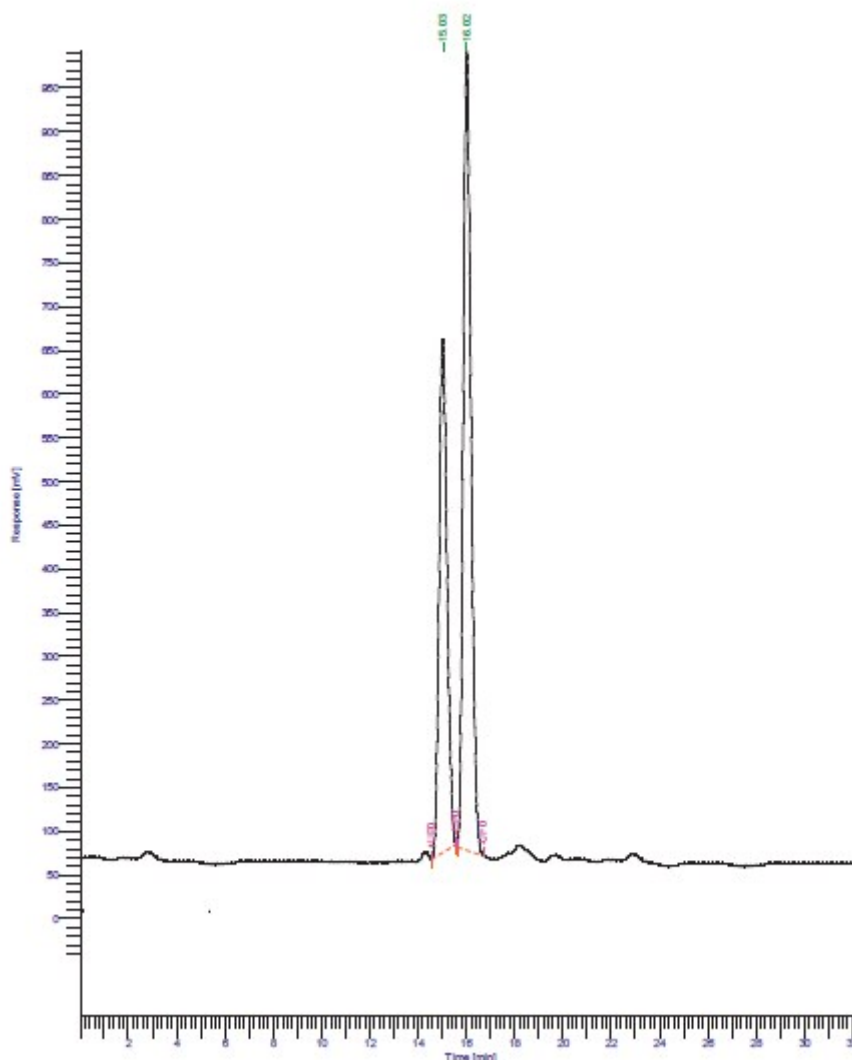

# DEFAULT REPORT

| Peak # | Component Name | Time [min] | Area [uV*sec] | Height [uV] | Area [%] | Norm. Area [%] | Cal. Range | Volt Range | BL | Raw Amount  | Adjusted Amount |
|--------|----------------|------------|---------------|-------------|----------|----------------|------------|------------|----|-------------|-----------------|
| 1      |                | 20.101     | 48829867.44   | 1.44e+06    | 49.09    | 49.09          |            |            |    | *MM 48.8299 | 48.8299         |
| 2      |                | 21.897     | 50629283.15   | 1.33e+06    | 50.90    | 50.90          |            |            |    | *MM 50.6293 | 50.6293         |
| 3      |                | 29.949     | 2691.12       | 1235.16     | 0.00     | 0.00           |            |            |    | *MM 0.0027  | 0.0027          |
|        |                |            | 99461841.71   | 2.77e+06    | 100.00   | 100.00         |            |            |    | 99.4618     | 99.4618         |

Missing Component Report  
Component Expected Retention (Calibration File)

All components were found

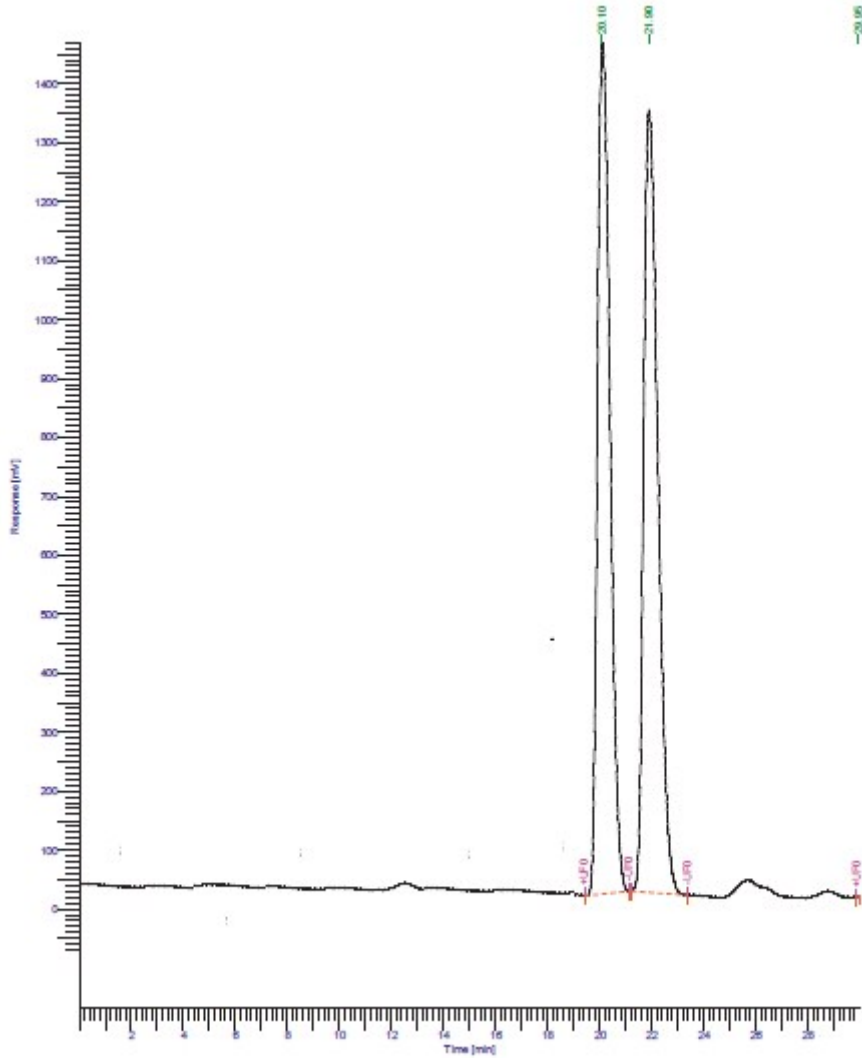

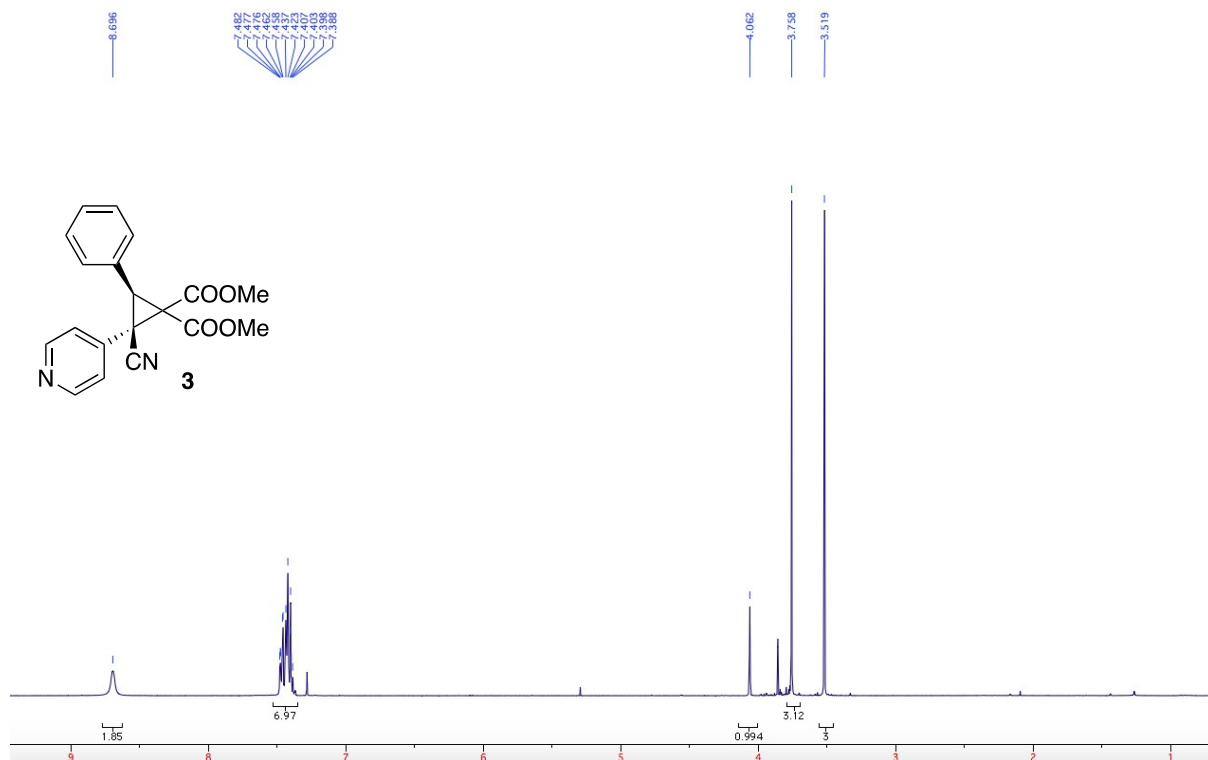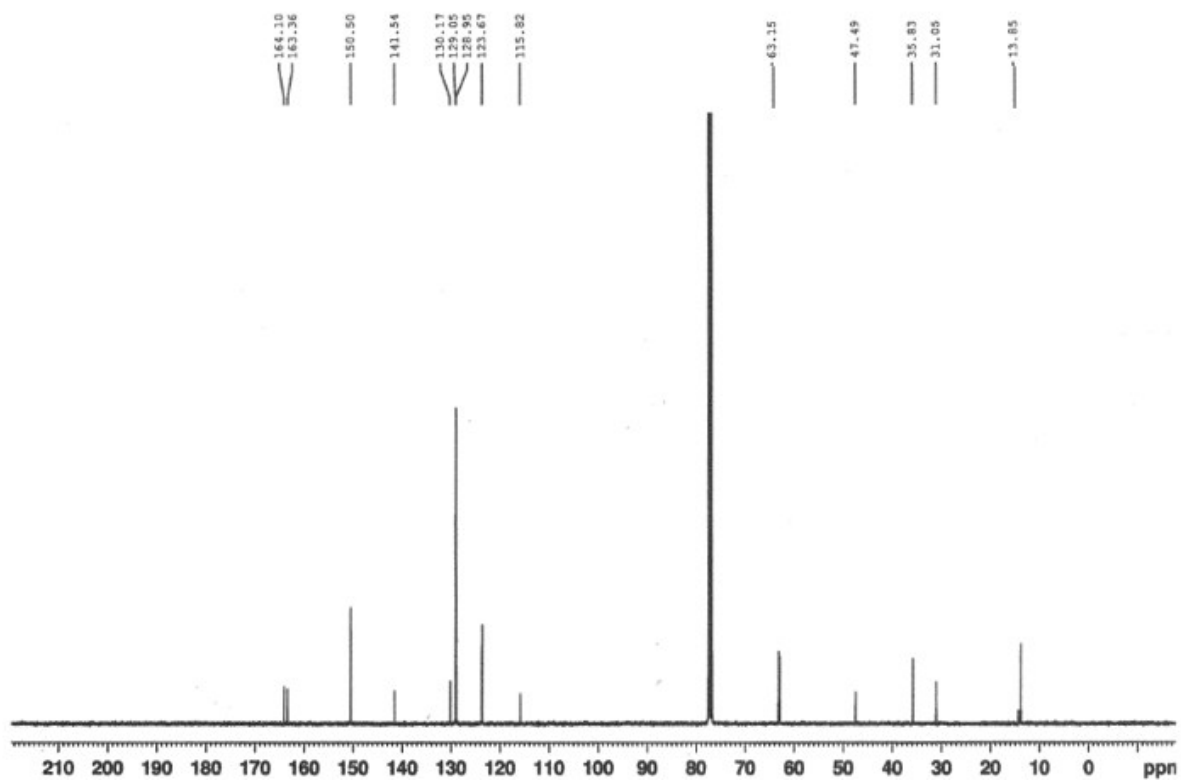

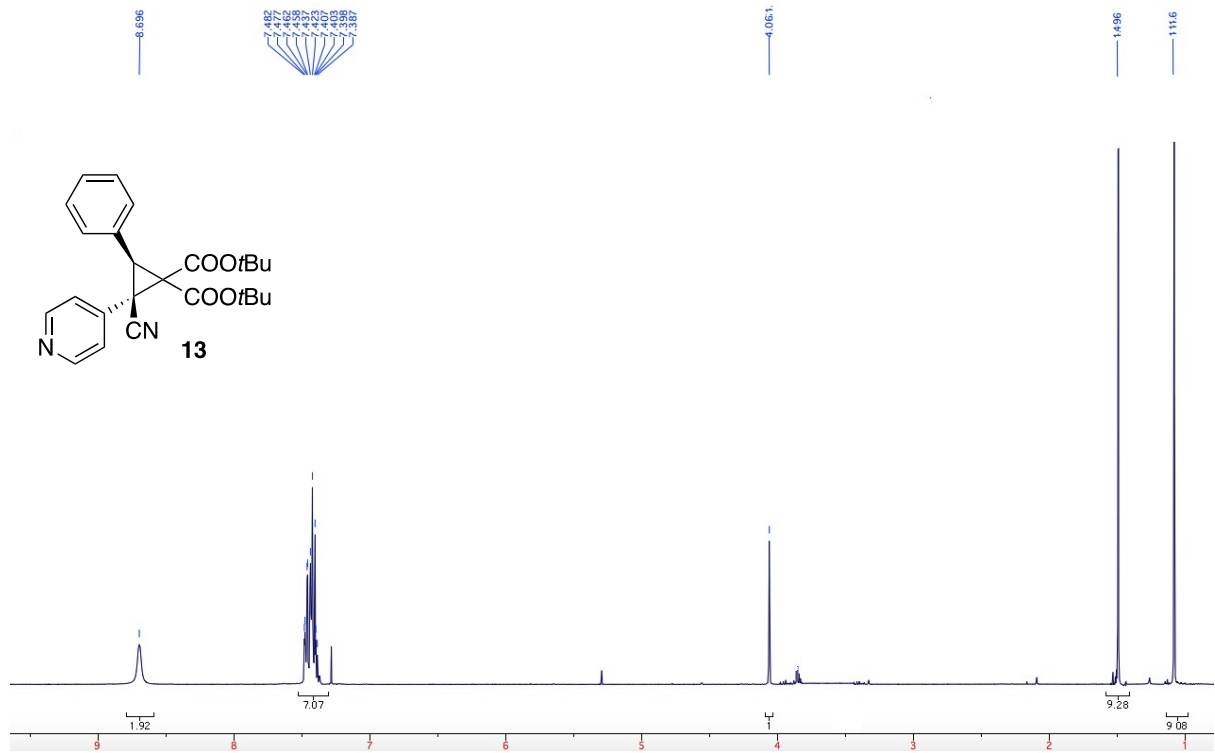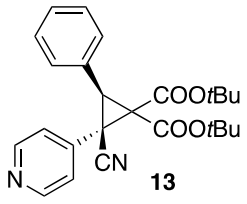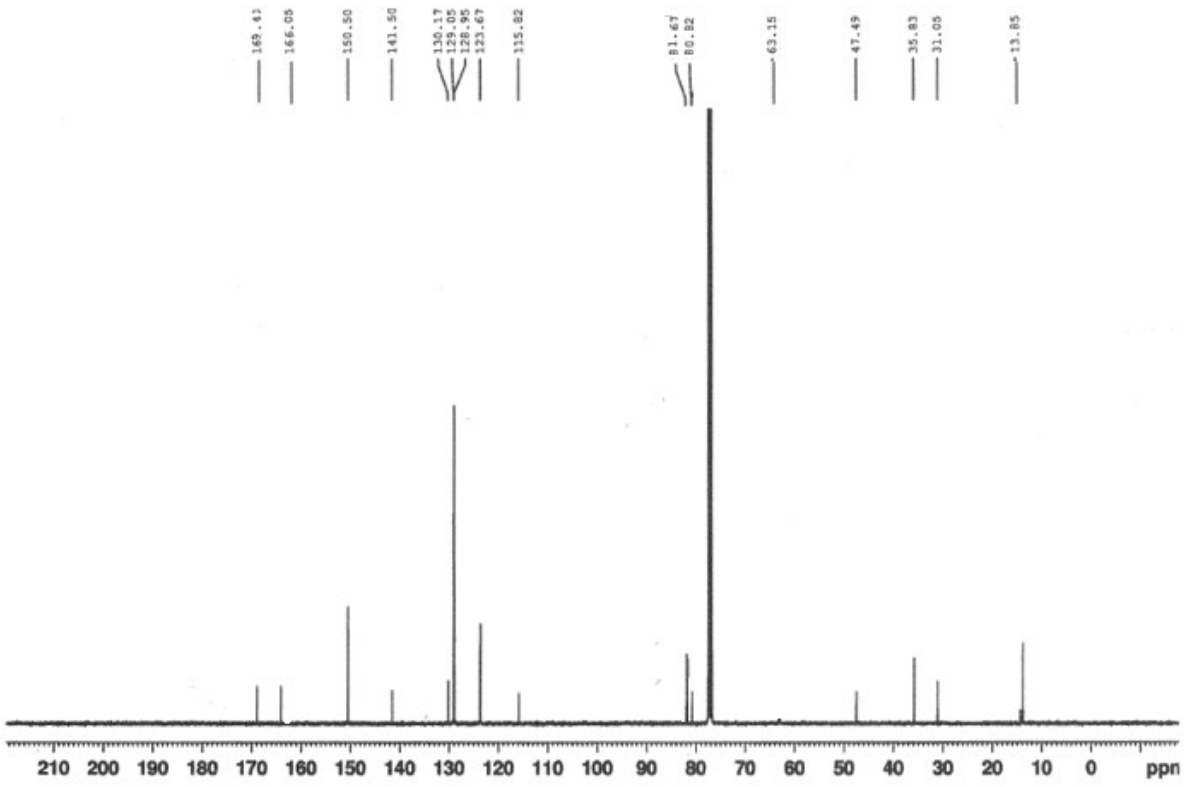



### Compound 3

## DEFAULT REPORT

| Peak # | Component Name | Time [min] | Area [uV*sec] | Height [uV] | Area [%] | Norm. Area [%] | Cal. Range | Volt Range | BL  | Raw Amount | Adjusted Amount |
|--------|----------------|------------|---------------|-------------|----------|----------------|------------|------------|-----|------------|-----------------|
| 1      |                | 26.275     | 30974526.90   | 362318.32   | 88.92    | 88.92          |            |            | *MM | 30.9745    | 30.9745         |
| 2      |                | 31.416     | 3859334.41    | 44074.25    | 11.08    | 11.08          |            |            | *MM | 3.8593     | 3.8593          |
|        |                |            | 34833861.31   | 406392.57   | 100.00   | 100.00         |            |            |     | 34.8339    | 34.8339         |

Missing Component Report  
Component Expected Retention (Calibration File)

All components were found

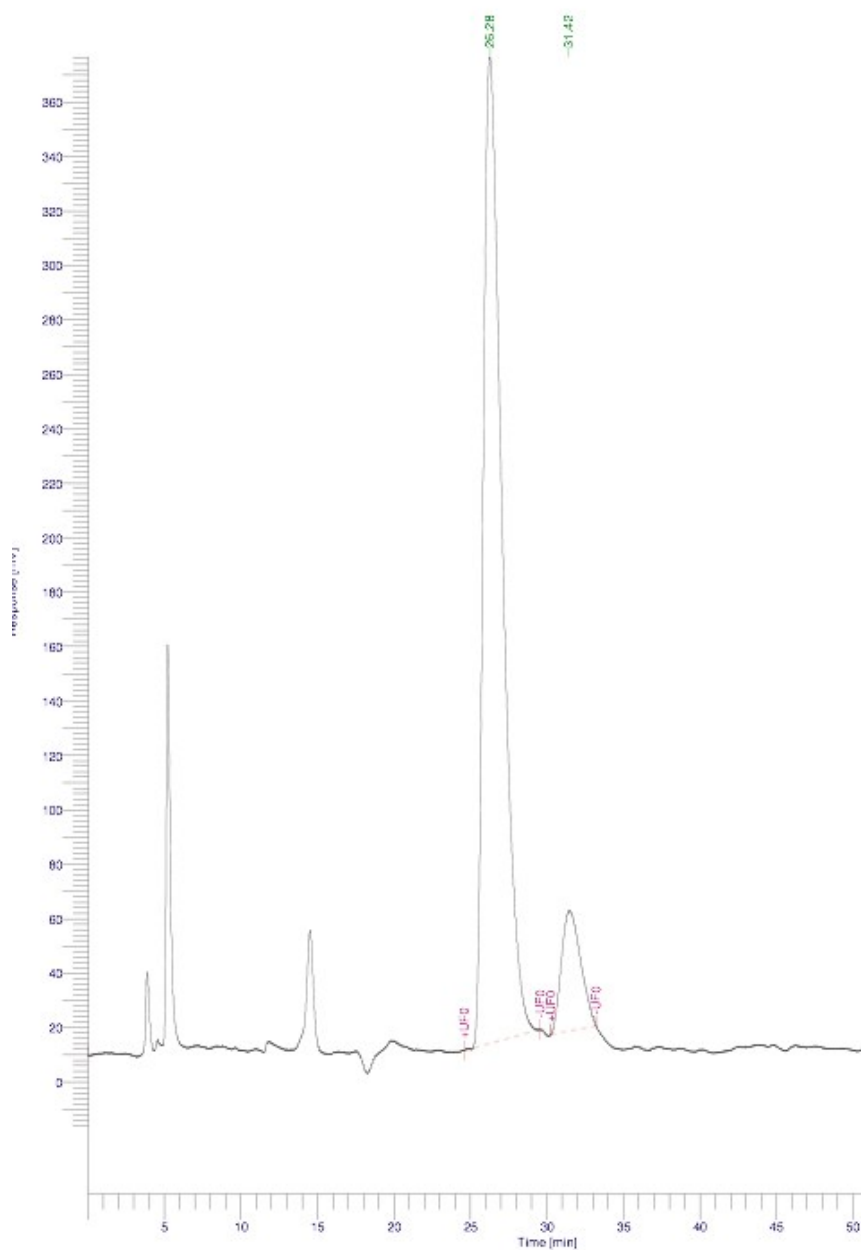

# DEFAULT REPORT

| Peak # | Component Name | Time [min] | Area [uV*sec] | Height [uV] | Area [%] | Norm. Area [%] | Cal. Range | Volt Range | BL  | Raw Amount | Adjusted Amount |
|--------|----------------|------------|---------------|-------------|----------|----------------|------------|------------|-----|------------|-----------------|
| 1      |                | 26.884     | 20866612.39   | 237380.66   | 50.46    | 50.46          |            |            | *MM | 20.8666    | 20.8666         |
| 2      |                | 31.555     | 20485605.08   | 179036.05   | 49.54    | 49.54          |            |            | *MM | 20.4856    | 20.4856         |
|        |                |            | 41352217.48   | 416416.71   | 100.00   | 100.00         |            |            |     | 41.3522    | 41.3522         |

## Missing Component Report

Component    Expected Retention (Calibration File)

All components were found

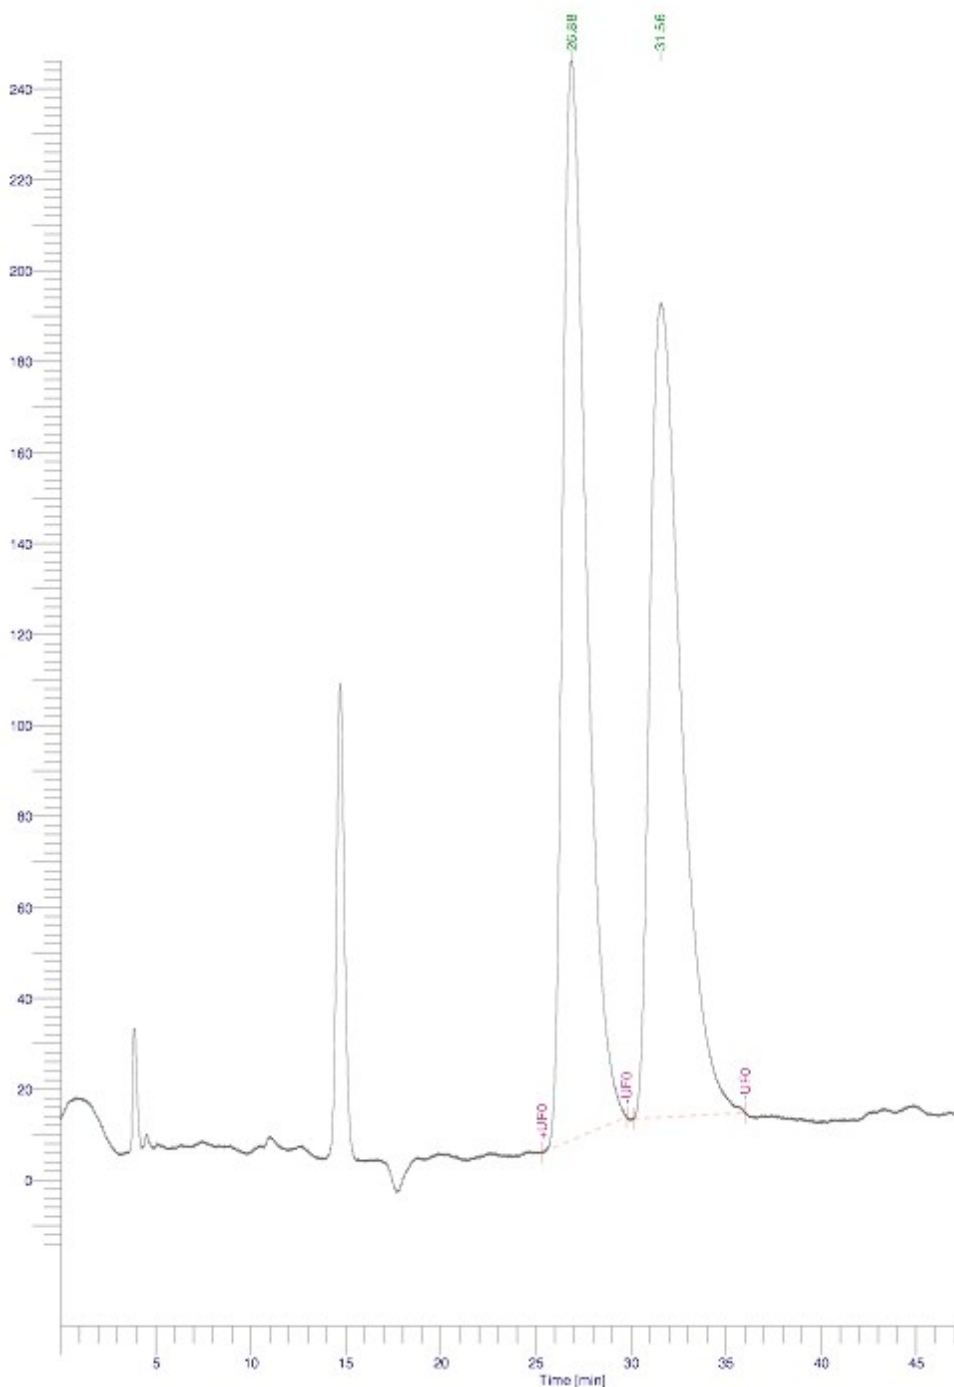

Compound 13

## DEFAULT REPORT

| Peak # | Component Name | Time [min] | Area [uV*sec] | Height [uV] | Area [%] | Norm. Area [%] | Cal. Range | Volt Range | BL    | Raw Amount | Adjusted Amount |
|--------|----------------|------------|---------------|-------------|----------|----------------|------------|------------|-------|------------|-----------------|
| 1      |                | 13.655     | 30974526.90   | 362318.32   | 82.24    | 82.24          |            |            | + *MM | 30.9745    | 30.9745         |
| 2      |                | 19.052     | 3859334.41    | 44074.25    | 17.76    | 17.76          |            |            | *MM   | 3.8593     | 3.8593          |
|        |                |            | 34833861.31   | 406392.57   | 100.00   | 100.00         |            |            |       | 34.8339    | 434.8339        |

Warning -- Signal level out-of-range in peak

Missing Component Report

Component Expected Retention (Calibration File)

All components were found

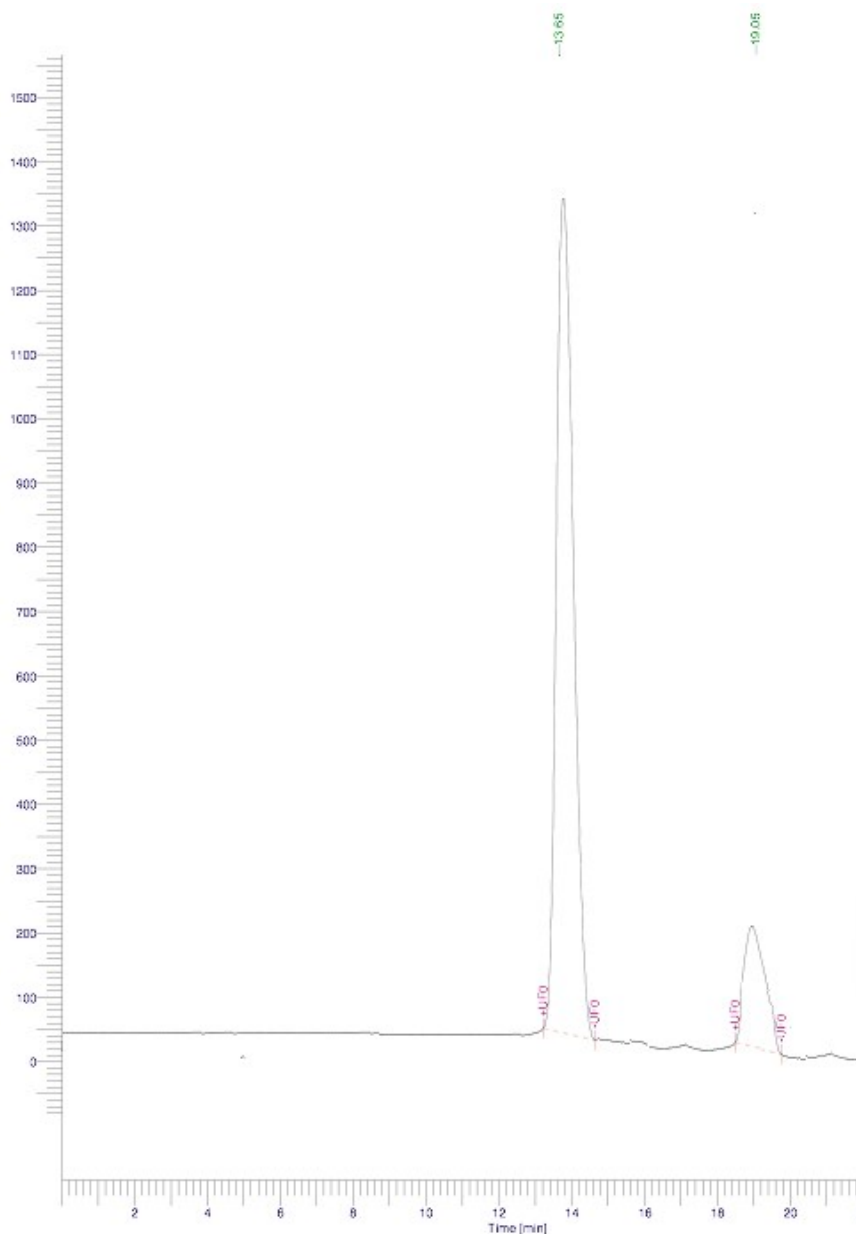

# DEFAULT REPORT

| Peak # | Component Name | Time [min] | Area [uV*sec] | Height [uV] | Area [%] | Norm. Area [%] | Cal. Range | Volt Range | BL    | Raw Amount | Adjusted Amount |
|--------|----------------|------------|---------------|-------------|----------|----------------|------------|------------|-------|------------|-----------------|
| 1      |                | 13.706     | 37769910.34   | 1.49e+06    | 49.03    | 49.03          |            |            | + *MM | -----      | -----           |
| 2      |                | 19.133     | 39269801.37   | 1.19e+06    | 50.97    | 50.97          |            |            | *MM   | 39.2698    | 39.2698         |
|        |                |            | 77039711.71   | 2.68e+06    | 100.00   | 100.00         |            |            |       | 39.2698    | 39.2698         |

Warning -- Signal level out-of-range in peak

### Missing Component Report

Component Expected Retention (Calibration File)

All components were found

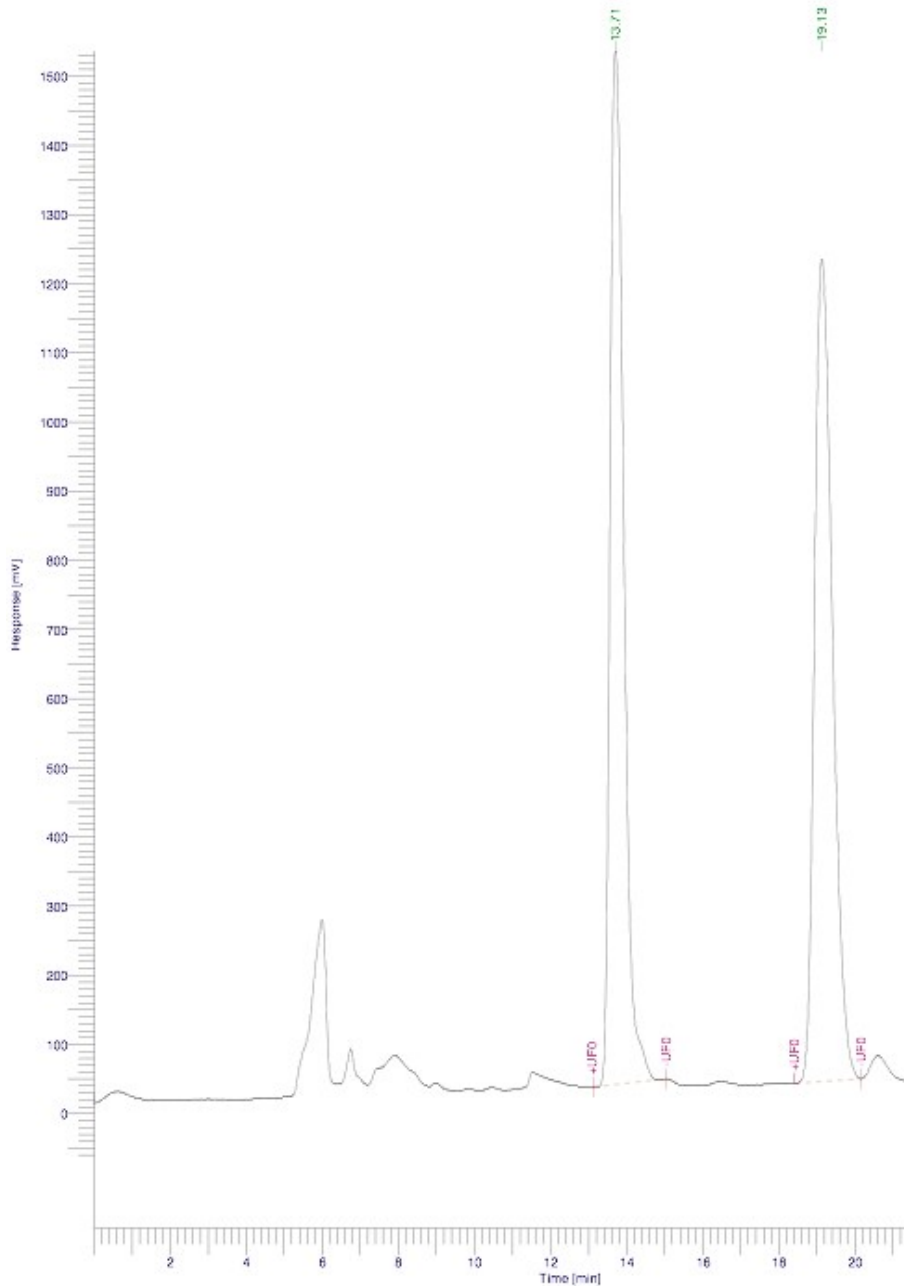

## X-ray of compound **3a**

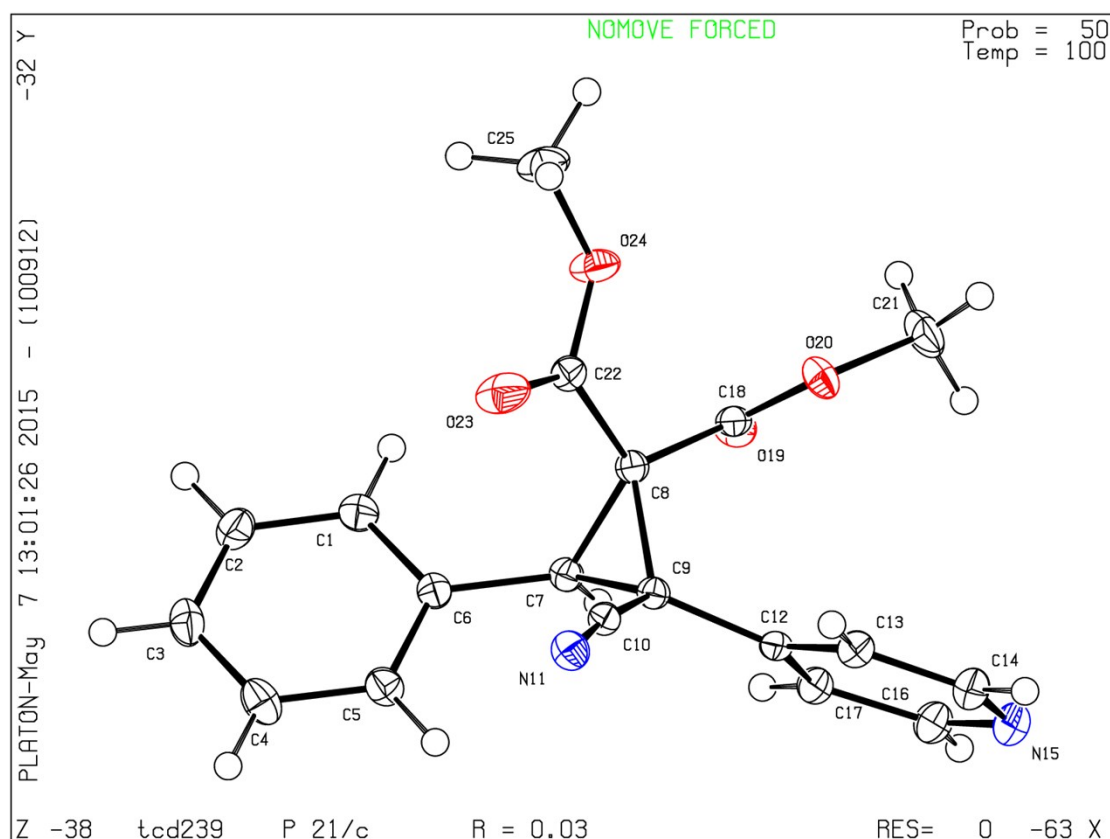

A specimen of  $C_{19}H_{16}N_2O_4$ , approximate dimensions 0.090 mm x 0.220 mm x 0.320 mm, was used for the X-ray crystallographic analysis. The X-ray intensity data were measured at 100(2)K using an Oxford Cryosystems Cobra low temperature device using a MiTeGen micromount. See Table 1 for collection parameters and exposure time. Bruker APEX software was used to correct for Lorentz and polarization effects.

A total of 1904 frames were collected. The total exposure time was 9.52 hours. The integration of the data using a monoclinic unit cell yielded a total of 38423 reflections to a maximum  $\theta$  angle of  $30.14^\circ$  (0.71 Å resolution), of which 4916 were independent (average redundancy 7.816, completeness = 99.8%,  $R_{\text{int}} = 1.92\%$ ,  $R_{\text{sig}} = 1.06\%$ ) and 4327 (88.02%) were greater than  $2\sigma(F^2)$ . The final cell constants of  $a = 9.5875(4)$  Å,  $b = 10.4816(5)$  Å,  $c = 16.9137(8)$  Å,  $\beta = 100.3989(12)^\circ$ , volume =  $1671.78(13)$  Å<sup>3</sup>, are based upon the refinement of the XYZ-centroids of reflections above  $20\sigma(I)$ . Data were corrected for absorption effects using the multi-scan method (SADABS). The ratio of minimum to maximum apparent transmission was 0.961. The calculated minimum and maximum transmission coefficients (based on crystal size) are 0.7166 and 0.7460.

The structure was solved and refined using the Bruker SHELXTL Software Package, using the space group  $P2_1/c$ , with  $Z = 4$  for the formula unit,  $C_{19}H_{16}N_2O_4$ . The final anisotropic full-

matrix least-squares refinement on  $F^2$  with 228 variables converged at  $R1 = 3.50\%$ , for the observed data and  $wR2 = 10.07\%$  for all data. The goodness-of-fit was 1.039. The largest peak in the final difference electron density synthesis was  $0.417 \text{ e}/\text{\AA}^3$  and the largest hole was  $-0.206 \text{ e}/\text{\AA}^3$  with an RMS deviation of  $0.043 \text{ e}/\text{\AA}^3$ . On the basis of the final model, the calculated density was  $1.336 \text{ g}/\text{cm}^3$  and  $F(000)$ , 704  $e^-$ .

**References:**

Bruker APEX2 v2014.11-0, Bruker AXS Inc., Madison, Wisconsin, USA.

SADABS (2014/5) Bruker AXS Inc., Madison, Wisconsin, USA; Sheldrick, G. M. University of Göttingen, Germany.

SHELXL-2014, (2014), Bruker AXS Inc., Madison, Wisconsin, USA; Sheldrick, G. M. University of Göttingen, Germany.

Table 1: Data collection details for TCD239.

| Axis  | dx/mm  | 2 $\theta$ / $^{\circ}$ | $\omega$ / $^{\circ}$ | $\varphi$ / $^{\circ}$ | $\chi$ / $^{\circ}$ | Width/ $^{\circ}$ | Frames | Time/s | Wavelength/ $\text{\AA}$ | Voltage/kV | Current/mA | Temperature/K |
|-------|--------|-------------------------|-----------------------|------------------------|---------------------|-------------------|--------|--------|--------------------------|------------|------------|---------------|
| Omega | 45.000 | 27.36                   | 18.58                 | 255.00                 | -54.74              | 0.60              | 206    | 18.00  | 0.71073                  | 50         | 30.0       | 100           |
| Omega | 45.000 | 27.36                   | 18.58                 | 102.00                 | -54.74              | 0.60              | 206    | 18.00  | 0.71073                  | 50         | 30.0       | 100           |
| Omega | 45.000 | 28.47                   | 278.50                | 355.86                 | 43.94               | 0.60              | 203    | 18.00  | 0.71073                  | 50         | 30.0       | 100           |
| Omega | 45.000 | 27.36                   | 18.58                 | 204.00                 | -54.74              | 0.60              | 206    | 18.00  | 0.71073                  | 50         | 30.0       | 100           |
| Omega | 45.000 | 28.47                   | 279.83                | 82.48                  | 41.28               | 0.60              | 202    | 18.00  | 0.71073                  | 50         | 30.0       | 100           |
| Omega | 45.000 | 12.36                   | 2.68                  | 0.00                   | -54.74              | 0.60              | 209    | 18.00  | 0.71073                  | 50         | 30.0       | 100           |
| Phi   | 45.000 | 27.36                   | 17.69                 | 278.20                 | -57.06              | 0.60              | 286    | 18.00  | 0.71073                  | 50         | 30.0       | 100           |
| Phi   | 45.000 | 27.36                   | 287.26                | 230.00                 | 23.00               | 0.60              | 180    | 18.00  | 0.71073                  | 50         | 30.0       | 100           |
| Omega | 45.000 | 27.36                   | 18.58                 | 51.00                  | -54.74              | 0.60              | 206    | 18.00  | 0.71073                  | 50         | 30.0       | 100           |

Table 2. Crystal data and structure refinement for ted239.

|                                   |                                                               |                    |
|-----------------------------------|---------------------------------------------------------------|--------------------|
| Identification code               | ted239                                                        |                    |
| Empirical formula                 | C <sub>19</sub> H <sub>16</sub> N <sub>2</sub> O <sub>4</sub> |                    |
| Formula weight                    | 336.34                                                        |                    |
| Temperature                       | 100(2) K                                                      |                    |
| Wavelength                        | 0.71073 Å                                                     |                    |
| Crystal system                    | Monoclinic                                                    |                    |
| Space group                       | P2 <sub>1</sub> /c                                            |                    |
| Unit cell dimensions              | a = 9.5857(4) Å                                               | α = 90°.           |
|                                   | b = 10.4800(5) Å                                              | β = 100.4013(12)°. |
|                                   | c = 16.9107(8) Å                                              | γ = 90°.           |
| Volume                            | 1670.90(13) Å <sup>3</sup>                                    |                    |
| Z                                 | 4                                                             |                    |
| Density (calculated)              | 1.337 Mg/m <sup>3</sup>                                       |                    |
| Absorption coefficient            | 0.095 mm <sup>-1</sup>                                        |                    |
| F(000)                            | 704                                                           |                    |
| Crystal size                      | 0.320 x 0.220 x 0.090 mm <sup>3</sup>                         |                    |
| Theta range for data collection   | 2.160 to 27.510°.                                             |                    |
| Index ranges                      | -12 ≤ h ≤ 12, -13 ≤ k ≤ 13, -19 ≤ l ≤ 21                      |                    |
| Reflections collected             | 32841                                                         |                    |
| Independent reflections           | 3841 [R(int) = 0.0182]                                        |                    |
| Completeness to theta = 25.242°   | 100.0 %                                                       |                    |
| Absorption correction             | Semi-empirical from equivalents                               |                    |
| Max. and min. transmission        | 0.7460 and 0.7166                                             |                    |
| Refinement method                 | Full-matrix least-squares on F <sup>2</sup>                   |                    |
| Data / restraints / parameters    | 3841 / 0 / 228                                                |                    |
| Goodness-of-fit on F <sup>2</sup> | 1.051                                                         |                    |
| Final R indices [I > 2σ(I)]       | R1 = 0.0327, wR2 = 0.0920                                     |                    |
| R indices (all data)              | R1 = 0.0365, wR2 = 0.0961                                     |                    |
| Largest diff. peak and hole       | 0.344 and -0.185 e.Å <sup>-3</sup>                            |                    |



Table 3. Atomic coordinates ( $\times 10^4$ ) and equivalent isotropic displacement parameters ( $\text{\AA}^2 \times 10^3$ ) for tcd239.  $U(\text{eq})$  is defined as one third of the trace of the orthogonalized  $U^{ij}$  tensor.

|       | x        | y       | z       | U(eq) |
|-------|----------|---------|---------|-------|
| C(1)  | -588(1)  | 1500(1) | 537(1)  | 21(1) |
| C(2)  | -1844(1) | 1290(1) | -4(1)   | 24(1) |
| C(3)  | -3107(1) | 1120(1) | 277(1)  | 23(1) |
| C(4)  | -3107(1) | 1122(1) | 1097(1) | 23(1) |
| C(5)  | -1844(1) | 1306(1) | 1638(1) | 19(1) |
| C(6)  | -580(1)  | 1522(1) | 1363(1) | 16(1) |
| C(7)  | 812(1)   | 1665(1) | 1924(1) | 15(1) |
| C(8)  | 1703(1)  | 2863(1) | 1973(1) | 15(1) |
| C(9)  | 1003(1)  | 2442(1) | 2692(1) | 14(1) |
| C(10) | -211(1)  | 3164(1) | 2854(1) | 15(1) |
| N(11) | -1172(1) | 3643(1) | 3044(1) | 19(1) |
| C(12) | 1998(1)  | 2048(1) | 3448(1) | 15(1) |
| C(13) | 2231(1)  | 2869(1) | 4106(1) | 19(1) |
| C(14) | 3238(1)  | 2539(1) | 4772(1) | 23(1) |
| N(15) | 4015(1)  | 1472(1) | 4821(1) | 26(1) |
| C(16) | 3761(1)  | 681(1)  | 4190(1) | 23(1) |
| C(17) | 2765(1)  | 917(1)  | 3498(1) | 19(1) |
| C(18) | 3293(1)  | 2657(1) | 2101(1) | 16(1) |
| O(19) | 3849(1)  | 1752(1) | 1845(1) | 21(1) |
| O(20) | 3969(1)  | 3589(1) | 2547(1) | 21(1) |
| C(21) | 5502(1)  | 3476(1) | 2726(1) | 27(1) |
| C(22) | 1174(1)  | 4034(1) | 1500(1) | 17(1) |
| O(23) | 22(1)    | 4492(1) | 1464(1) | 31(1) |
| O(24) | 2172(1)  | 4462(1) | 1115(1) | 25(1) |
| C(25) | 1854(1)  | 5613(1) | 640(1)  | 29(1) |

Table 4. Bond lengths [ $\text{\AA}$ ] and angles [ $^\circ$ ] for *tcd239*.

|              |            |                  |            |
|--------------|------------|------------------|------------|
| C(1)-C(2)    | 1.3917(14) | C(21)-H(21C)     | 0.9800     |
| C(1)-C(6)    | 1.3949(14) | C(22)-O(23)      | 1.1956(12) |
| C(1)-H(1)    | 0.9500     | C(22)-O(24)      | 1.3290(12) |
| C(2)-C(3)    | 1.3892(15) | O(24)-C(25)      | 1.4500(12) |
| C(2)-H(2)    | 0.9500     | C(25)-H(25A)     | 0.9800     |
| C(3)-C(4)    | 1.3871(15) | C(25)-H(25B)     | 0.9800     |
| C(3)-H(3)    | 0.9500     | C(25)-H(25C)     | 0.9800     |
| C(4)-C(5)    | 1.3936(14) |                  |            |
| C(4)-H(4)    | 0.9500     | C(2)-C(1)-C(6)   | 120.53(9)  |
| C(5)-C(6)    | 1.3930(13) | C(2)-C(1)-H(1)   | 119.7      |
| C(5)-H(5)    | 0.9500     | C(6)-C(1)-H(1)   | 119.7      |
| C(6)-C(7)    | 1.4990(12) | C(3)-C(2)-C(1)   | 119.99(10) |
| C(7)-C(8)    | 1.5122(13) | C(3)-C(2)-H(2)   | 120.0      |
| C(7)-C(9)    | 1.5148(13) | C(1)-C(2)-H(2)   | 120.0      |
| C(7)-H(7)    | 1.0000     | C(4)-C(3)-C(2)   | 119.93(9)  |
| C(8)-C(22)   | 1.5023(13) | C(4)-C(3)-H(3)   | 120.0      |
| C(8)-C(18)   | 1.5159(12) | C(2)-C(3)-H(3)   | 120.0      |
| C(8)-C(9)    | 1.5550(13) | C(3)-C(4)-C(5)   | 120.00(10) |
| C(9)-C(10)   | 1.4556(13) | C(3)-C(4)-H(4)   | 120.0      |
| C(9)-C(12)   | 1.5083(12) | C(5)-C(4)-H(4)   | 120.0      |
| C(10)-N(11)  | 1.1451(13) | C(6)-C(5)-C(4)   | 120.51(9)  |
| C(12)-C(17)  | 1.3886(14) | C(6)-C(5)-H(5)   | 119.7      |
| C(12)-C(13)  | 1.3925(14) | C(4)-C(5)-H(5)   | 119.7      |
| C(13)-C(14)  | 1.3883(14) | C(5)-C(6)-C(1)   | 118.99(9)  |
| C(13)-H(13)  | 0.9500     | C(5)-C(6)-C(7)   | 122.17(9)  |
| C(14)-N(15)  | 1.3383(15) | C(1)-C(6)-C(7)   | 118.63(8)  |
| C(14)-H(14)  | 0.9500     | C(6)-C(7)-C(8)   | 123.18(8)  |
| N(15)-C(16)  | 1.3383(15) | C(6)-C(7)-C(9)   | 123.58(8)  |
| C(16)-C(17)  | 1.3928(14) | C(8)-C(7)-C(9)   | 61.82(6)   |
| C(16)-H(16)  | 0.9500     | C(6)-C(7)-H(7)   | 113.0      |
| C(17)-H(17)  | 0.9500     | C(8)-C(7)-H(7)   | 113.0      |
| C(18)-O(19)  | 1.2047(12) | C(9)-C(7)-H(7)   | 113.0      |
| C(18)-O(20)  | 1.3298(12) | C(22)-C(8)-C(7)  | 121.06(8)  |
| O(20)-C(21)  | 1.4509(12) | C(22)-C(8)-C(18) | 115.28(8)  |
| C(21)-H(21A) | 0.9800     | C(7)-C(8)-C(18)  | 115.65(8)  |
| C(21)-H(21B) | 0.9800     | C(22)-C(8)-C(9)  | 119.74(8)  |

|                   |            |                     |           |
|-------------------|------------|---------------------|-----------|
| C(7)-C(8)-C(9)    | 59.17(6)   | C(12)-C(17)-H(17)   | 120.7     |
| C(18)-C(8)-C(9)   | 114.36(7)  | C(16)-C(17)-H(17)   | 120.7     |
| C(10)-C(9)-C(12)  | 112.76(8)  | O(19)-C(18)-O(20)   | 125.48(9) |
| C(10)-C(9)-C(7)   | 117.65(8)  | O(19)-C(18)-C(8)    | 124.00(9) |
| C(12)-C(9)-C(7)   | 122.64(8)  | O(20)-C(18)-C(8)    | 110.50(8) |
| C(10)-C(9)-C(8)   | 118.23(8)  | C(18)-O(20)-C(21)   | 115.39(8) |
| C(12)-C(9)-C(8)   | 116.41(7)  | O(20)-C(21)-H(21A)  | 109.5     |
| C(7)-C(9)-C(8)    | 59.01(6)   | O(20)-C(21)-H(21B)  | 109.5     |
| N(11)-C(10)-C(9)  | 172.92(10) | H(21A)-C(21)-H(21B) | 109.5     |
| C(17)-C(12)-C(13) | 118.13(9)  | O(20)-C(21)-H(21C)  | 109.5     |
| C(17)-C(12)-C(9)  | 122.19(9)  | H(21A)-C(21)-H(21C) | 109.5     |
| C(13)-C(12)-C(9)  | 119.57(9)  | H(21B)-C(21)-H(21C) | 109.5     |
| C(14)-C(13)-C(12) | 118.81(10) | O(23)-C(22)-O(24)   | 125.43(9) |
| C(14)-C(13)-H(13) | 120.6      | O(23)-C(22)-C(8)    | 125.12(9) |
| C(12)-C(13)-H(13) | 120.6      | O(24)-C(22)-C(8)    | 109.43(8) |
| N(15)-C(14)-C(13) | 123.83(10) | C(22)-O(24)-C(25)   | 116.98(8) |
| N(15)-C(14)-H(14) | 118.1      | O(24)-C(25)-H(25A)  | 109.5     |
| C(13)-C(14)-H(14) | 118.1      | O(24)-C(25)-H(25B)  | 109.5     |
| C(14)-N(15)-C(16) | 116.65(9)  | H(25A)-C(25)-H(25B) | 109.5     |
| N(15)-C(16)-C(17) | 123.93(10) | O(24)-C(25)-H(25C)  | 109.5     |
| N(15)-C(16)-H(16) | 118.0      | H(25A)-C(25)-H(25C) | 109.5     |
| C(17)-C(16)-H(16) | 118.0      | H(25B)-C(25)-H(25C) | 109.5     |
| C(12)-C(17)-C(16) | 118.60(10) |                     |           |

---

Table 5. Anisotropic displacement parameters ( $\text{\AA}^2 \times 10^3$ ) for tcd239. The anisotropic displacement factor exponent takes the form:  $-2\pi^2 [ h^2 a^{*2} U^{11} + \dots + 2 h k a^* b^* U^{12} ]$

|       | $U^{11}$ | $U^{22}$ | $U^{33}$ | $U^{23}$ | $U^{13}$ | $U^{12}$ |
|-------|----------|----------|----------|----------|----------|----------|
| C(1)  | 19(1)    | 24(1)    | 20(1)    | 1(1)     | 5(1)     | -2(1)    |
| C(2)  | 27(1)    | 26(1)    | 17(1)    | 1(1)     | 1(1)     | -2(1)    |
| C(3)  | 18(1)    | 23(1)    | 26(1)    | -1(1)    | -4(1)    | 1(1)     |
| C(4)  | 16(1)    | 25(1)    | 29(1)    | -6(1)    | 5(1)     | -1(1)    |
| C(5)  | 18(1)    | 21(1)    | 19(1)    | -3(1)    | 5(1)     | -2(1)    |
| C(6)  | 15(1)    | 13(1)    | 18(1)    | 0(1)     | 2(1)     | 1(1)     |
| C(7)  | 14(1)    | 14(1)    | 17(1)    | 1(1)     | 3(1)     | 1(1)     |
| C(8)  | 13(1)    | 15(1)    | 16(1)    | 1(1)     | 3(1)     | 1(1)     |
| C(9)  | 13(1)    | 14(1)    | 16(1)    | 2(1)     | 2(1)     | 1(1)     |
| C(10) | 16(1)    | 15(1)    | 15(1)    | 1(1)     | 1(1)     | -2(1)    |
| N(11) | 17(1)    | 19(1)    | 21(1)    | -1(1)    | 4(1)     | 1(1)     |
| C(12) | 13(1)    | 17(1)    | 16(1)    | 4(1)     | 2(1)     | -2(1)    |
| C(13) | 19(1)    | 19(1)    | 18(1)    | 2(1)     | 2(1)     | 0(1)     |
| C(14) | 24(1)    | 26(1)    | 18(1)    | 1(1)     | -1(1)    | -3(1)    |
| N(15) | 23(1)    | 28(1)    | 23(1)    | 6(1)     | -2(1)    | 0(1)     |
| C(16) | 20(1)    | 23(1)    | 26(1)    | 7(1)     | 0(1)     | 3(1)     |
| C(17) | 17(1)    | 18(1)    | 20(1)    | 3(1)     | 1(1)     | 0(1)     |
| C(18) | 14(1)    | 17(1)    | 17(1)    | 4(1)     | 4(1)     | 0(1)     |
| O(19) | 17(1)    | 19(1)    | 27(1)    | 1(1)     | 7(1)     | 3(1)     |
| O(20) | 13(1)    | 21(1)    | 27(1)    | -2(1)    | 2(1)     | -2(1)    |
| C(21) | 12(1)    | 30(1)    | 38(1)    | 0(1)     | 1(1)     | -3(1)    |
| C(22) | 17(1)    | 16(1)    | 17(1)    | 1(1)     | 2(1)     | 0(1)     |
| O(23) | 22(1)    | 34(1)    | 40(1)    | 19(1)    | 12(1)    | 12(1)    |
| O(24) | 24(1)    | 23(1)    | 29(1)    | 12(1)    | 11(1)    | 5(1)     |
| C(25) | 32(1)    | 24(1)    | 31(1)    | 14(1)    | 10(1)    | 3(1)     |

Table 6. Hydrogen coordinates ( $\times 10^4$ ) and isotropic displacement parameters ( $\text{\AA}^2 \times 10^{-3}$ ) for tcd239.

|        | x     | y    | z    | U(eq) |
|--------|-------|------|------|-------|
| H(1)   | 271   | 1629 | 342  | 25    |
| H(2)   | -1838 | 1265 | -565 | 28    |
| H(3)   | -3969 | 1001 | -93  | 28    |
| H(4)   | -3969 | 998  | 1290 | 28    |
| H(5)   | -1844 | 1285 | 2200 | 23    |
| H(7)   | 1392  | 867  | 1979 | 18    |
| H(13)  | 1711  | 3641 | 4099 | 23    |
| H(14)  | 3384  | 3104 | 5218 | 28    |
| H(16)  | 4293  | -88  | 4216 | 28    |
| H(17)  | 2613  | 318  | 3070 | 23    |
| H(21A) | 5767  | 2728 | 3068 | 41    |
| H(21B) | 5910  | 4245 | 3006 | 41    |
| H(21C) | 5865  | 3377 | 2223 | 41    |
| H(25A) | 1221  | 5406 | 134  | 43    |
| H(25B) | 2736  | 5980 | 525  | 43    |
| H(25C) | 1390  | 6233 | 941  | 43    |

Table 7. Torsion angles [°] for tcd239.

|                        |             |                         |             |
|------------------------|-------------|-------------------------|-------------|
| C(6)-C(1)-C(2)-C(3)    | 0.92(16)    | C(17)-C(12)-C(13)-C(14) | 1.51(14)    |
| C(1)-C(2)-C(3)-C(4)    | -1.80(17)   | C(9)-C(12)-C(13)-C(14)  | -174.67(9)  |
| C(2)-C(3)-C(4)-C(5)    | 0.52(17)    | C(12)-C(13)-C(14)-N(15) | 0.41(16)    |
| C(3)-C(4)-C(5)-C(6)    | 1.65(16)    | C(13)-C(14)-N(15)-C(16) | -1.56(16)   |
| C(4)-C(5)-C(6)-C(1)    | -2.51(15)   | C(14)-N(15)-C(16)-C(17) | 0.81(16)    |
| C(4)-C(5)-C(6)-C(7)    | -177.18(9)  | C(13)-C(12)-C(17)-C(16) | -2.19(14)   |
| C(2)-C(1)-C(6)-C(5)    | 1.23(15)    | C(9)-C(12)-C(17)-C(16)  | 173.89(9)   |
| C(2)-C(1)-C(6)-C(7)    | 176.08(9)   | N(15)-C(16)-C(17)-C(12) | 1.06(16)    |
| C(5)-C(6)-C(7)-C(8)    | -118.85(10) | C(22)-C(8)-C(18)-O(19)  | -117.14(11) |
| C(1)-C(6)-C(7)-C(8)    | 66.47(12)   | C(7)-C(8)-C(18)-O(19)   | 32.16(13)   |
| C(5)-C(6)-C(7)-C(9)    | -42.92(14)  | C(9)-C(8)-C(18)-O(19)   | 98.17(11)   |
| C(1)-C(6)-C(7)-C(9)    | 142.39(9)   | C(22)-C(8)-C(18)-O(20)  | 64.51(10)   |
| C(6)-C(7)-C(8)-C(22)   | 5.18(14)    | C(7)-C(8)-C(18)-O(20)   | -146.19(8)  |
| C(9)-C(7)-C(8)-C(22)   | -108.36(9)  | C(9)-C(8)-C(18)-O(20)   | -80.18(10)  |
| C(6)-C(7)-C(8)-C(18)   | -142.21(9)  | O(19)-C(18)-O(20)-C(21) | 0.31(14)    |
| C(9)-C(7)-C(8)-C(18)   | 104.25(9)   | C(8)-C(18)-O(20)-C(21)  | 178.63(8)   |
| C(6)-C(7)-C(8)-C(9)    | 113.54(10)  | C(7)-C(8)-C(22)-O(23)   | 47.41(15)   |
| C(6)-C(7)-C(9)-C(10)   | -4.98(13)   | C(18)-C(8)-C(22)-O(23)  | -165.08(10) |
| C(8)-C(7)-C(9)-C(10)   | 107.95(9)   | C(9)-C(8)-C(22)-O(23)   | -22.42(15)  |
| C(6)-C(7)-C(9)-C(12)   | 143.68(9)   | C(7)-C(8)-C(22)-O(24)   | -131.16(9)  |
| C(8)-C(7)-C(9)-C(12)   | -103.39(9)  | C(18)-C(8)-C(22)-O(24)  | 16.34(12)   |
| C(6)-C(7)-C(9)-C(8)    | -112.93(10) | C(9)-C(8)-C(22)-O(24)   | 159.01(8)   |
| C(22)-C(8)-C(9)-C(10)  | 3.58(13)    | O(23)-C(22)-O(24)-C(25) | 2.88(16)    |
| C(7)-C(8)-C(9)-C(10)   | -106.98(9)  | C(8)-C(22)-O(24)-C(25)  | -178.55(9)  |
| C(18)-C(8)-C(9)-C(10)  | 146.57(8)   |                         |             |
| C(22)-C(8)-C(9)-C(12)  | -135.61(9)  |                         |             |
| C(7)-C(8)-C(9)-C(12)   | 113.83(9)   |                         |             |
| C(18)-C(8)-C(9)-C(12)  | 7.38(12)    |                         |             |
| C(22)-C(8)-C(9)-C(7)   | 110.55(9)   |                         |             |
| C(18)-C(8)-C(9)-C(7)   | -106.45(9)  |                         |             |
| C(10)-C(9)-C(12)-C(17) | 147.51(9)   |                         |             |
| C(7)-C(9)-C(12)-C(17)  | -2.52(14)   |                         |             |
| C(8)-C(9)-C(12)-C(17)  | -71.14(12)  |                         |             |
| C(10)-C(9)-C(12)-C(13) | -36.48(12)  |                         |             |
| C(7)-C(9)-C(12)-C(13)  | 173.50(8)   |                         |             |
| C(8)-C(9)-C(12)-C(13)  | 104.88(10)  |                         |             |



Table 8. Hydrogen bonds for tcd239 [ $\text{\AA}$  and  $^\circ$ ].

| D-H...A               | d(D-H) | d(H...A) | d(D...A)   | $\angle(\text{DHA})$ |
|-----------------------|--------|----------|------------|----------------------|
| C(16)-H(16)...N(15)#1 | 0.95   | 2.54     | 3.3371(14) | 142                  |

Symmetry transformations used to generate equivalent atoms:

#1  $-x+1, -y, -z+1$
